# Supplementary material for: Pd-catalyzed asymmetric Suzuki–Miyaura coupling reactions for the synthesis of chiral biaryl compounds with a large steric substituent at the 2-position
Source: publisher site journal article supplement (doi:10.3762/bjoc.16.85), 2020-05-11
Supplement: Additional file 1 [file 1860-5397-16-85-S1.pdf]

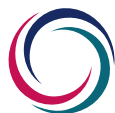

## Supporting Information

for

### **Pd-catalyzed asymmetric Suzuki–Miyaura coupling reactions for the synthesis of chiral biaryl compounds with a large steric substituent at the 2-position**

Yongsu Li, Bendu Pan, Xuefeng He, Wang Xia, Yaqi Zhang, Hao Liang, Chitreddy V. Subba Reddy, Rihui Cao and Liqin Qiu

*Beilstein J. Org. Chem.* **2020**, *16*, 966–973. [doi:10.3762/bjoc.16.85](https://doi.org/10.3762/bjoc.16.85)

### **Further experimental data, copies of NMR spectra and HPLC chromatograms**

## Table of Contents

|                                    |     |
|------------------------------------|-----|
| General consideration .....        | S2  |
| Experimental section.....          | S2  |
| Copies of NMR spectra.....         | S14 |
| Copies of HPLC chromatograms ..... | S49 |

## General consideration

All reactions and controls were accomplished in a nitrogen-filled glove box or under nitrogen using standard techniques unless otherwise noted. All the commercially available chemicals were purchased from suppliers such as Titan, Aladdin etc. and were used without further purification and the reactions were monitored by TLC. All the reactions were performed using oven dried glassware. A WRS-3 melting point apparatus was used for recording the melting points in open capillaries and are uncorrected. Column chromatography was performed using silica gel (200–300 mesh). The  $^1\text{H}$  NMR and  $^{13}\text{C}$  NMR values were obtained using a Bruker Avance-400 MHz spectrometer in  $\text{CDCl}_3$  or  $\text{DMSO-}d_6$  solvent with TMS or other deuterated solvent as the internal standard. The products' enantiomeric excesses (ee values) were determined by chiral HPLC analysis using an Agilent HP 1200 instrument (*n*-hexane/2-propanol as eluent) with a Chialcel OD-H, AD-H or IA-3. Chemical shift values ( $\delta$ ) were expressed in parts per million (ppm). Coupling constants (*J*) are reported in Hertz (Hz). Abbreviations are as follows: s = singlet, d = doublet, t = triplet, q = quartet, m = multiplet and dd = doublet of doublets.

## Experimental section

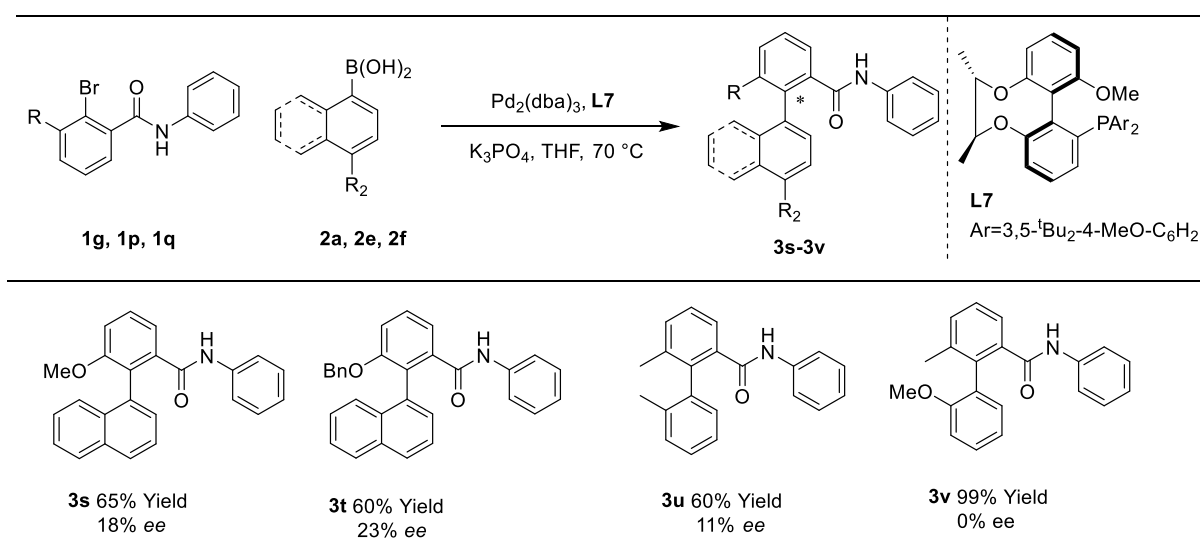

**Scheme S1:** Asymmetric Suzuki–Miyaura coupling. Reaction conditions: 1 equiv of aryl bromoaryl compounds, 2 equiv of arylboronic acids, 5 mol % Pd, 6 mol % of ligand, 3 equiv of  $\text{K}_3\text{PO}_4$ , 2 mL solvent, 70 °C, 72 h; Yields are combined isolated values; ee values were determined by HPLC.

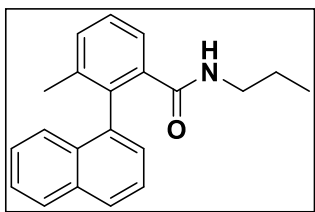

### 3-Methyl-2-(naphthalen-1-yl)-N-propylbenzamide (3a)

White solid, 84% yield, 77% ee,  $[\alpha]_D^{20} = -4.4$ , M.P.: 70.8 – 71.8 °C.

The enantiomeric excess was determined by HPLC analysis using a chiral stationary phase column [Daicel Chiralcel® AD-H, 254 nm, *n*-hexane/*i*PrOH = 95:5 as the eluent, flow rate: 1 mL/min,

retention times: 9.9 min (minor isomer) and 11.6 min (major isomer)]. <sup>1</sup>H NMR (400 MHz, CDCl<sub>3</sub>, ppm) δ 7.92 (d, *J* = 8.2 Hz, 1H), 7.89 (d, *J* = 8.4 Hz, 1H), 7.70 (dd, *J* = 6.2, 2.9 Hz, 1H), 7.53 (m, 1H), 7.50 (dd, *J* = 8.5, 4.3 Hz, 1H), 7.45 – 7.38 (m, 4H), 7.34 (d, *J* = 6.9 Hz, 1H), 5.10 (s, 1H), 2.83 (td, *J* = 13.4, 6.6 Hz, 1H), 2.70 (td, *J* = 12.9, 7.0 Hz, 1H), 1.95 (s, 3H), 0.71 – 0.59 (m, 1H), 0.59 – 0.46 (m, 1H), 0.28 (t, *J* = 7.4 Hz, 3H); <sup>13</sup>C NMR (101 MHz, CDCl<sub>3</sub>, ppm) δ 168.83, 137.64, 137.37, 137.20, 136.58, 133.69, 131.90, 131.66, 128.66, 128.12, 127.99, 127.01, 126.90, 126.49, 126.23, 125.78, 124.91, 41.13, 21.88, 20.34, 10.81; MS(ESI): *m/z* 304 [M+H]<sup>+</sup>

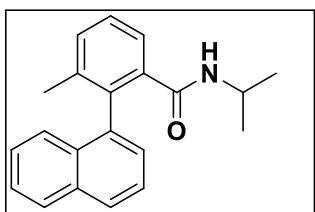

### N-Isopropyl-3-methyl-2-(naphthalen-1-yl)benzamide (3b)

White solid, 67% yield, 79% ee,  $[\alpha]_D^{20} = -60.9$ , M.P.: 89.3 – 91.1 °C.

The enantiomeric excess was determined by HPLC analysis using a chiral stationary phase column [Daicel Chiralcel® OD-H, 254 nm,

*n*-hexane/*i*PrOH = 97:3 as the eluent, flow rate: 1 mL/min, retention times: 10.1 min (minor isomer) and 11.1 min (major isomer)]. <sup>1</sup>H NMR (400 MHz, CDCl<sub>3</sub>, ppm) δ 7.92 (m, 2H), 7.72 – 7.66 (m, 1H), 7.55 (dd, *J* = 6.0, 4.8 Hz, 1H), 7.53 – 7.49 (m, 1H), 7.44 (m, 3H), 7.42 (m, 1H), 7.34 (dd, *J* = 7.0, 1.0 Hz, 1H), 5.00 – 4.75 (s, 1H), 3.71 – 3.59 (m, 1H), 1.99 (s, 3H), 0.40 (d, *J* = 6.5 Hz, 3H), 0.27 (d, *J* = 6.5 Hz, 3H); <sup>13</sup>C NMR (101 MHz, CDCl<sub>3</sub>, ppm) δ 167.88, 137.56, 137.52, 137.27, 136.53, 133.70, 132.08, 131.61, 128.63, 128.05, 128.01, 127.03, 126.96, 126.42, 126.24, 125.76, 124.87, 40.89, 21.69, 21.52, 20.33; MS(ESI): *m/z* 304 [M+H]<sup>+</sup>

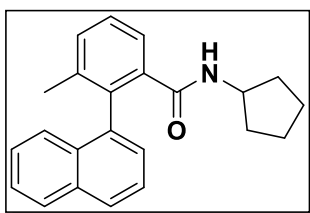

### N-Cyclopentyl-3-methyl-2-(naphthalen-1-yl)benzamide (3c)

White solid, 97% yield, 76% ee,  $[\alpha]_D^{20} = -66.5$ , M.P.: 95.9 – 96.8 °C

The enantiomeric excess was determined by HPLC analysis using a chiral stationary phase column [Daicel Chiralcel® AD-H, 254 nm,

*n*-hexane/*i*PrOH = 95:5 as the eluent, flow rate: 1 mL/min, retention times: 8.8 min (minor isomer) and 9.8 min (major isomer)]. <sup>1</sup>H NMR (400 MHz, CDCl<sub>3</sub>, ppm) δ 7.92 (m, 2H), 7.73 – 7.70 (m, 1H), 7.54 (m, 1H), 7.53 – 7.48 (m, 1H), 7.45 – 7.38 (m, 4H), 7.33 (m, 1H), 5.05 (s, 1H), 3.92 – 3.76 (m, 1H), 1.96 (s, 3H), 1.48 – 1.25 (m, 2H), 1.21 – 1.07 (m, 2H), 0.95 – 0.69 (m, 2H), 0.56 – 0.39 (m, 1H), 0.29 – 0.15 (m, 1H); <sup>13</sup>C NMR (101 MHz, CDCl<sub>3</sub>, ppm) δ 168.07, 137.55, 137.40, 137.30, 136.48, 133.70, 131.95, 131.63, 128.12, 128.03, 127.10, 126.95, 126.58, 126.30, 125.85, 124.82, 50.75, 32.32, 32.27, 23.18, 23.07, 20.34; MS(ESI): *m/z* 330 [M+H]<sup>+</sup>

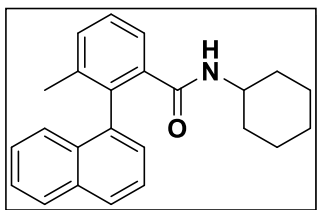

### ***N*-Cyclohexyl-3-methyl-2-(naphthalen-1-yl)benzamide (3d)**

White solid, 98% yield, 75% ee,  $[\alpha]_D^{20} = -67.6$ , M.P.: 128.8 – 129.8 °C. The enantiomeric excess was determined by HPLC analysis using a chiral stationary phase column [Daicel Chiralcel® AD-H, 254 nm, *n*-hexane/*i*PrOH = 95:5 as the eluent, flow rate: 1 mL/min, retention times: 7.4 min (minor isomer) and 9.0 min (major isomer)]. <sup>1</sup>H NMR (400 MHz, CDCl<sub>3</sub>, ppm) δ 7.94 (m, 2H), 7.72 (dd, *J* = 6.6, 2.4 Hz, 1H), 7.58 – 7.55 (m, 1H), 7.53 (m, 1H), 7.48 – 7.41 (m, 4H), 7.36 (m, 1H), 5.01 (s, 1H), 3.68 – 3.18 (m, 1H), 1.99 (s, 3H), 1.38 – 1.29 (m, 1H), 1.23 (m, 2H), 1.17 – 0.94 (m, 4H), 0.87 – 0.73 (m, 1H), 0.26 (m, 1H), 0.10 – -0.04 (m, 1H); <sup>13</sup>C NMR (101 MHz, CDCl<sub>3</sub>, ppm) δ 167.80, 137.59, 137.57, 137.28, 136.49, 133.74, 132.04, 131.58, 128.64, 128.07, 128.00, 127.03, 126.92, 126.52, 126.24, 125.81, 124.87, 47.54, 32.00, 31.75, 25.24, 24.19, 24.12, 20.35; MS(ESI): *m/z* 344 [M+H]<sup>+</sup>

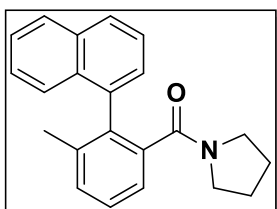

### **3-Methyl-2-(naphthalen-1-yl)phenyl(pyrrolidin-1-yl)methanone (3e)**

White solid, 83% yield, 77% ee,  $[\alpha]_D^{20} = -108.3$ , M.P.: 105.5 – 106.7 °C. The enantiomeric excess was determined by HPLC analysis using a chiral stationary phase column [Daicel Chiralcel® AD-H, 254 nm, *n*-hexane/*i*PrOH = 95:5 as the eluent, flow rate: 1 mL/min, retention times: 12.0 min (minor isomer) and 17.0 min (major isomer)]. <sup>1</sup>H NMR (400 MHz, CDCl<sub>3</sub>, ppm) δ 7.86 (m, 1H), 7.82 (d, *J* = 8.2 Hz, 1H), 7.50 (d, *J* = 7.1 Hz, 1H), 7.47 (d, *J* = 5.8 Hz, 1H), 7.44 (d, *J* = 1.1 Hz, 1H), 7.42 (d, *J* = 6.9 Hz, 1H), 7.40 – 7.37 (m, 1H), 7.37 – 7.32 (m, 2H), 7.25 (dd, *J* = 6.5, 1.8 Hz, 1H), 7.25 (m, 1H), 3.24 – 3.12 (m, 1H), 3.07 (dt, *J* = 10.9, 6.6 Hz, 1H), 3.03 – 2.94 (m, 1H), 2.94 – 2.85 (m, 1H), 1.98 (s, 3H), 1.66 – 1.56 (m, 1H), 1.56 – 1.48 (m, 1H), 1.49 – 1.38 (m, 1H), 1.14 (m, 1H); <sup>13</sup>C NMR (101 MHz, CDCl<sub>3</sub>, ppm) δ 169.10, 139.18, 138.06, 136.17, 133.39, 131.56, 130.17, 128.41, 127.90, 127.85, 127.24, 125.92, 125.69, 125.60, 125.30, 123.52, 48.40, 44.81, 25.43, 24.08, 20.31; MS(ESI): *m/z* 316 [M+H]<sup>+</sup>

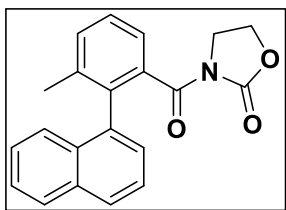

### **3-(3-Methyl-2-(naphthalen-1-yl)benzoyl)oxazolidin-2-one (3f)**

White solid, 76% yield, 70% ee,  $[\alpha]_D^{20} = -47.9$ , M.P.: 74.3 – 75.5 °C. The enantiomeric excess was determined by HPLC analysis using a chiral stationary phase column [Daicel Chiralcel® AD-H, 254 nm, *n*-hexane/*i*PrOH = 97:3 as the eluent, flow rate: 1 mL/min, retention times: 34.2 min (major isomer) and 38.9 min (minor isomer)]. <sup>1</sup>H NMR (400 MHz, CDCl<sub>3</sub>, ppm) δ 7.78 (m, 2H), 7.44 – 7.36 (m, 5H), 7.34 (d, *J* = 8.3 Hz, 1H), 7.29 (m, 2H), 3.73 (m, 1H), 3.66 (m, 1H), 3.37 (m, 1H), 3.19 (m, 1H), 1.95 (s, 3H); <sup>13</sup>C NMR (101 MHz, CDCl<sub>3</sub>, ppm) δ 169.79, 152.47, 137.62, 136.82, 136.26, 135.86, 133.33, 132.12, 131.71, 127.93, 127.91, 127.67, 126.36, 126.32, 126.15, 125.09, 124.43, 61.96, 42.51, 20.19; MS(ESI): *m/z* 354 [M+Na]<sup>+</sup>

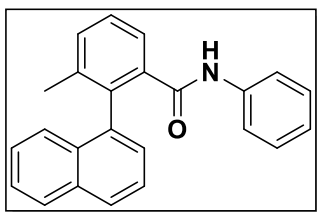

### 3-Methyl-2-(naphthalen-1-yl)-*N*-phenylbenzamide (3g)

White solid, 85% yield, 78% ee,  $[\alpha]_D^{20} = -102.4$ , M.P.: 125.9 – 126.7 °C. The enantiomeric excess was determined by HPLC analysis using a chiral stationary phase column [Daicel Chiralcel® AD-H, 254 nm, *n*-hexane/*i*PrOH = 97:3 as the eluent, flow rate: 1 mL/min, retention times: 27.4 min (major isomer) and 32.4 min (minor isomer)]. <sup>1</sup>H NMR (400 MHz, CDCl<sub>3</sub>, ppm) δ 7.95 (d, *J* = 8.1 Hz, 1H), 7.90 (d, *J* = 8.3 Hz, 1H), 7.86 (d, *J* = 4.9 Hz, 1H), 7.57 – 7.52 (m, 2H), 7.51 (d, *J* = 2.8 Hz, 1H), 7.48 (m, 3H), 7.39 (d, *J* = 6.9 Hz, 1H), 7.02 (m, 2H), 6.94 (s, 1H), 6.88 (m, 1H), 6.62 (m, 2H), 1.99 (s, 3H); <sup>13</sup>C NMR (101 MHz, CDCl<sub>3</sub>, ppm) δ 166.63, 137.92, 137.39, 136.89, 136.84, 136.69, 133.81, 132.35, 131.70, 128.92, 128.58, 128.53, 128.26, 127.46, 127.29, 127.09, 126.53, 126.09, 124.72, 123.99, 119.44, 77.37, 77.05, 76.73, 20.35; MS(ESI): *m/z* 338 [M+H]<sup>+</sup>

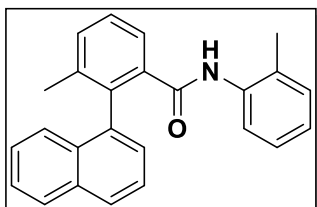

### 3-Methyl-2-(naphthalen-1-yl)-*N*-(*o*-tolyl)benzamide (3h)

White solid, 85% yield, 80% ee,  $[\alpha]_D^{20} = -61.1$ , M.P.: 108.1 – 108.5 °C. The enantiomeric excess was determined by HPLC analysis using a chiral stationary phase column [Daicel Chiralcel® AD-H, 254 nm, *n*-hexane/*i*PrOH = 95:5 as the eluent, flow rate: 1 mL/min, retention times: 27.0 min (major isomer) and 30.8 min (minor isomer)]. <sup>1</sup>H NMR (400 MHz, CDCl<sub>3</sub>, ppm) δ 7.91 (d, *J* = 7.9 Hz, 1H), 7.87 (d, *J* = 8.2 Hz, 1H), 7.83 (d, *J* = 5.5 Hz, 1H), 7.53 (m, 3H), 7.49 – 7.41 (m, 4H), 7.31 (d, *J* = 7.9 Hz, 1H), 6.98 (m, 1H), 6.89 (m, 2H), 6.68 (s, 1H), 6.68 (s, 1H), 1.96 (s, 3H), 1.28 (s, 3H); <sup>13</sup>C NMR (101 MHz, CDCl<sub>3</sub>, ppm) δ 167.31, 138.00, 137.36, 136.76, 136.45, 135.43, 133.85, 132.15, 131.88, 130.07, 129.37, 128.84, 128.47, 128.20, 127.21, 127.18, 127.07, 126.39, 126.31, 126.01, 124.98, 122.84, 20.38, 16.69; MS(ESI): *m/z* 352 [M+H]<sup>+</sup>

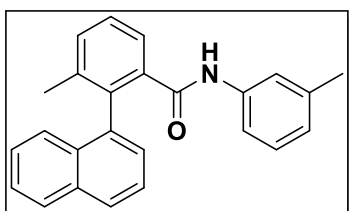

### 3-Methyl-2-(naphthalen-1-yl)-*N*-(*m*-tolyl)benzamide (3i)

White solid, 73% yield, 77% ee,  $[\alpha]_D^{20} = -45.3$ , M.P.: 116.6 – 117.7 °C. The enantiomeric excess was determined by HPLC analysis using a chiral stationary phase column [Daicel Chiralcel® OD-H, 254 nm, *n*-hexane/*i*PrOH = 95:5 as the eluent, flow rate: 1 mL/min, retention times: 12.1 min (minor isomer) and 14.0 min (major isomer)]. <sup>1</sup>H NMR (400 MHz, CDCl<sub>3</sub>, ppm) δ 7.96 (d, *J* = 8.1 Hz, 1H), 7.89 (d, *J* = 8.3 Hz, 1H), 7.85 (dd, *J* = 5.4, 3.6 Hz, 1H), 7.57 (d, *J* = 2.0 Hz, 1H), 7.56 – 7.54 (m, 1H), 7.53 (d, *J* = 1.0 Hz, 1H), 7.51 (d, *J* = 3.8 Hz, 2H), 7.49 – 7.46 (m, 2H), 7.38 (d, *J* = 6.9 Hz, 1H), 6.95 – 6.82 (m, 2H), 6.70 (d, *J* = 7.6 Hz, 1H), 6.51 (s, 1H), 6.31 (d, *J* = 7.9 Hz, 1H), 2.13 (s, 3H), 2.00 (s, 3H); <sup>13</sup>C NMR (101 MHz, CDCl<sub>3</sub>, ppm) δ 166.62, 138.43, 137.90, 137.27, 137.03, 136.86, 136.68, 133.85, 132.26, 131.73, 128.88, 128.47, 128.32, 128.24, 127.45, 127.22, 127.09, 126.48, 126.11, 124.79, 124.72, 120.19, 116.47, 77.34, 77.03, 76.71, 21.29, 20.32; MS(ESI): *m/z* 352 [M+H]<sup>+</sup>

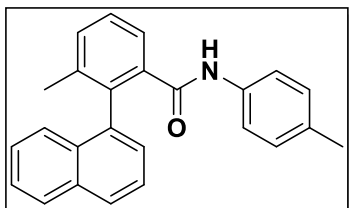

### 3-Methyl-2-(naphthalen-1-yl)-*N*-(*p*-tolyl)benzamide (3j)

White solid, 72% yield, 75% ee,  $[\alpha]_{\text{D}}^{20} = -125.5$ , M.P.: 109.5 – 110.0 °C. The enantiomeric excess was determined by HPLC analysis using a chiral stationary phase column [Daicel Chiralcel® OD-H, 254 nm, *n*-hexane/*i*PrOH = 95:5 as the eluent, flow rate: 1 mL/min, retention times: 12.1 min (minor isomer) and 13.0 min (major isomer)].  $^1\text{H NMR}$  (400 MHz,  $\text{CDCl}_3$ , ppm)  $\delta$  7.95 (d,  $J = 8.1$  Hz, 1H), 7.90 (d,  $J = 8.3$  Hz, 1H), 7.86 (dd,  $J = 6.1, 3.0$  Hz, 1H), 7.57 – 7.51 (m, 2H), 7.50 (m, 2H), 7.49 – 7.45 (m, 2H), 7.39 (d,  $J = 6.9$  Hz, 1H), 6.83 (m, 2H), 6.50 (m, 2H), 2.16 (s, 3H), 1.99 (s, 3H);  $^{13}\text{C NMR}$  (101 MHz,  $\text{CDCl}_3$ , ppm)  $\delta$  166.51, 137.86, 136.98, 136.89, 136.63, 134.81, 133.79, 133.61, 132.24, 131.70, 129.07, 128.88, 128.47, 128.23, 127.42, 127.27, 127.07, 126.50, 126.08, 124.73, 119.52, 20.74, 20.35; MS(ESI):  $m/z$  352  $[\text{M}+\text{H}]^+$

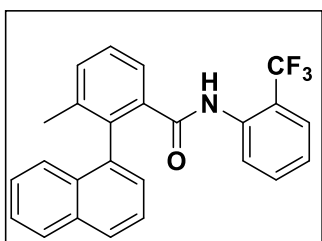

### 3-Methyl-2-(naphthalen-1-yl)-*N*-(2-(trifluoromethyl)phenyl)benzamide (3k)

White solid, 90% yield, 72% ee,  $[\alpha]_{\text{D}}^{20} = -49.2$ , M.P.: 80.4 – 81.5 °C. The enantiomeric excess was determined by HPLC analysis using a chiral stationary phase column [Daicel Chiralcel® OD-H, 254 nm, *n*-hexane/*i*PrOH = 95:5 as the eluent, flow rate: 1 mL/min, retention times: 6.7 min (minor isomer) and 7.5 min (major isomer)].  $^1\text{H NMR}$  (400 MHz,  $\text{CDCl}_3$ , ppm)  $\delta$  7.87 (d,  $J = 8.1$  Hz, 1H), 7.84 (d,  $J = 8.3$  Hz, 1H), 7.72 (dd,  $J = 6.4, 1.8$  Hz, 1H), 7.56 – 7.47 (m, 5H), 7.44 (m, 3H), 7.33 (m, 1H), 7.23 (m, 1H), 7.11 (m, 1H), 2.04 (s, 3H);  $^{13}\text{C NMR}$  (101 MHz,  $\text{CDCl}_3$ , ppm)  $\delta$  167.68, 138.30, 137.44, 137.08, 136.43, 134.72, 133.61, 132.47, 132.43, 131.87, 128.49, 128.28, 128.13, 126.80, 126.75, 126.12, 125.79, 125.79 (q, 20 Hz), 125.13, 124.96, 124.56, 20.33;  $^{19}\text{F NMR}$  (377 MHz,  $\text{CDCl}_3$ , ppm)  $\delta$  -61.06; MS(ESI):  $m/z$  406  $[\text{M}+\text{H}]^+$

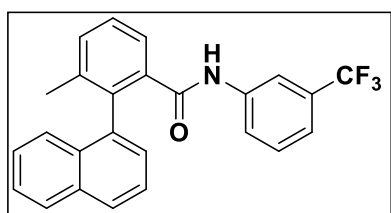

### 3-Methyl-2-(naphthalen-1-yl)-*N*-(3-(trifluoromethyl)phenyl)benzamide (3l)

White solid, 91% yield, 76% ee,  $[\alpha]_{\text{D}}^{20} = -52.0$ , M.P.: 124.5 – 125.6 °C. The enantiomeric excess was determined by HPLC analysis using a chiral stationary phase column [Daicel Chiralcel® OD-H, 254 nm, *n*-hexane/*i*PrOH = 97:3 as the eluent, flow rate: 1 mL/min, retention times: 9.9 min (minor isomer) and 10.7 min (major isomer)].  $^1\text{H NMR}$  (400 MHz,  $\text{CDCl}_3$ , ppm)  $\delta$  7.98 (d,  $J = 8.1$  Hz, 1H), 7.91 (d,  $J = 8.3$  Hz, 1H), 7.90 – 7.86 (m, 1H), 7.58 (dd,  $J = 7.9, 3.8$  Hz, 1H), 7.55 (dd,  $J = 7.0, 1.8$  Hz, 1H), 7.52 (d,  $J = 2.3$  Hz, 1H), 7.52 (m, 2H), 7.50 (d,  $J = 2.1$  Hz, 1H), 7.39 (dd,  $J = 7.0, 0.9$  Hz, 1H), 7.16 – 7.10 (m, 2H), 7.00 (s, 1H), 6.91 – 6.85 (m, 1H), 6.65 (s, 1H), 2.03 (s, 3H);  $^{13}\text{C NMR}$  (101 MHz,  $\text{CDCl}_3$ , ppm)  $\delta$  166.76, 138.01, 137.78, 136.75, 136.70, 136.34, 133.86, 132.71, 131.59,  $\delta$  130.88 (q,  $J = 32.4$  Hz), 129.10, 129.06, 128.66, 128.39, 127.73, 127.41, 127.15, 126.70, 126.18, 124.49, 122.31, 120.47, 120.44, 115.99, 115.95, 20.33;  $^{19}\text{F NMR}$  (376 MHz,  $\text{CDCl}_3$ )  $\delta$  -62.95; MS(ESI):  $m/z$  406  $[\text{M}+\text{H}]^+$

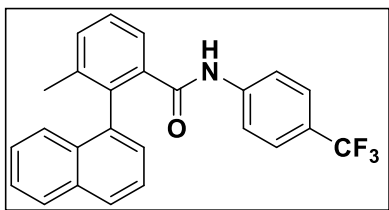

**3-Methyl-2-(naphthalen-1-yl)-N-(4-(trifluoromethyl)phenyl)benzamide (3m)**

White solid, 85% yield, 77% ee,  $[\alpha]_{\text{D}}^{20} = -54.0$ , M.P.: 135.0 – 136.3 °C. The enantiomeric excess was determined by HPLC analysis using a chiral stationary phase column [Daicel Chiralcel<sup>®</sup> AD-H, 254 nm, *n*-hexane/*i*PrOH = 95:5 as the eluent, flow rate: 1 mL/min, retention times: 13.2 min (minor isomer) and 15.1 min (major isomer)]. <sup>1</sup>H NMR (400 MHz, CDCl<sub>3</sub>, ppm) δ 7.98 (d, *J* = 8.1 Hz, 1H), 7.91 (d, *J* = 8.3 Hz, 1H), 7.87 (dd, *J* = 8.5, 4.5 Hz, 1H), 7.60 – 7.56 (m, 1H), 7.56 – 7.52 (m, 1H), 7.53 – 7.50 (m, 4H), 7.39 (dd, *J* = 6.9, 0.9 Hz, 1H), 7.28 (m, 2H), 7.06 (s, 1H), 6.70 (m, 2H), 2.01 (s, 3H); <sup>13</sup>C NMR (101 MHz, CDCl<sub>3</sub>, ppm) δ 166.75, 140.38, 138.06, 136.72, 136.66, 136.27, 133.81, 132.78, 131.57, 129.02, 128.70, 128.40, 127.67, 127.46, 127.15, 126.70, 126.16, 125.86 (q, *J* = 12.0 Hz), 124.55, 118.72, 20.32; <sup>19</sup>F NMR (376 MHz, CDCl<sub>3</sub>) δ -62.20; MS(ESI): *m/z* 406 [M+H]<sup>+</sup>

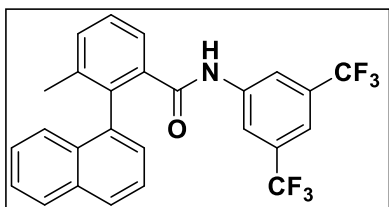

**N-(3,5-bis(trifluoromethyl)phenyl)-3-methyl-2-(naphthalen-1-yl)benzamide (3n)**

White solid, 95% yield, 75% ee,  $[\alpha]_{\text{D}}^{20} = -83.8$ , M.P.: 205.0 – 206.6 °C. The enantiomeric excess was determined by HPLC analysis using a chiral stationary phase column [Daicel Chiralcel<sup>®</sup> OD-H, 254 nm, *n*-hexane/*i*PrOH = 95:5 as the eluent, flow rate: 1 mL/min, retention times: 8.6 min (minor isomer) and 9.3 min (major isomer)]. <sup>1</sup>H NMR (400 MHz, CDCl<sub>3</sub>, ppm) δ 8.00 (d, *J* = 8.0 Hz, 1H), 7.92 (d, *J* = 8.3 Hz, 1H), 7.88 (dd, *J* = 6.9, 1.4 Hz, 1H), 7.63 – 7.59 (m, 1H), 7.58 (m, 1H), 7.54 (m, 4H), 7.38 (d, *J* = 7.0 Hz, 1H), 7.36 (s, 1H), 7.11 (s, 1H), 6.93 (s, 2H), 2.06 (s, 3H); <sup>13</sup>C NMR (101 MHz, CDCl<sub>3</sub>, ppm) δ 166.82, 138.58, 138.11, 136.81, 136.73, 136.59, 135.76, 133.89, 133.10, 131.98, 131.65, 131.50, 129.18, 128.78, 128.54, 128.02, 127.57, 127.25, 126.88, 126.31, 124.30, 121.50, 118.83 (q, *J* = 16 Hz), (q, *J* = 16 Hz), 20.32; <sup>19</sup>F NMR (377 MHz, CDCl<sub>3</sub>, ppm) δ -63.23; MS(ESI): *m/z* 474 [M+H]<sup>+</sup>

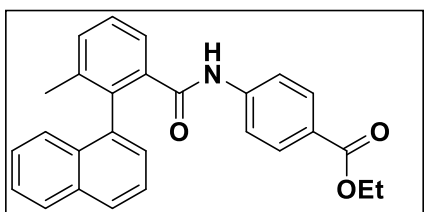

**Ethyl 4-(3-methyl-2-(naphthalen-1-yl)benzamido)benzoate (3o)**

White solid, 60% yield, 88% ee,  $[\alpha]_{\text{D}}^{20} = -141.0$ , M.P.: 86.9 – 87.5 °C. The enantiomeric excess was determined by HPLC analysis using a chiral stationary phase column [Daicel Chiralcel<sup>®</sup> OD-H, 254 nm, *n*-hexane/*i*PrOH = 95:5 as the eluent, flow rate: 1 mL/min, retention times: 14.5 min (minor isomer) and 18.2 min (major isomer)]. <sup>1</sup>H NMR (400 MHz, CDCl<sub>3</sub>, ppm) δ 7.97 (d, *J* = 8.1 Hz, 1H), 7.92 – 7.85 (m, 2H), 7.71 (m, 2H), 7.60 – 7.53 (m, 2H), 7.51 (m, 4H), 7.39 (dd, *J* = 6.9, 0.8 Hz, 1H), 7.10



(s, 1H), 6.67 (m, 2H), 4.28 (q,  $J = 7.1$  Hz, 2H), 2.02 (s, 3H), 1.32 (t,  $J = 7.1$  Hz, 3H);  $^{13}\text{C}$  NMR (101 MHz,  $\text{CDCl}_3$ , ppm)  $\delta$  166.71, 166.02, 141.45, 138.03, 136.76, 136.64, 136.44, 133.81, 132.71, 131.57, 130.37, 129.02, 128.67, 128.36, 127.63, 127.41, 127.13, 126.65, 126.13, 125.56, 124.55, 118.14, 60.72, 20.33, 14.31; MS(ESI):  $m/z$  410  $[\text{M}+\text{H}]^+$

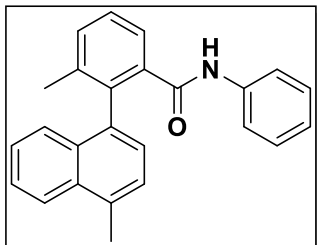

### 3-Methyl-2-(4-methylnaphthalen-1-yl)-*N*-phenylbenzamide

(3p)

White solid, 73% yield, 75% ee,  $[\alpha]_{\text{D}}^{20} = -57.3$ , M.P.: 143.3 – 143.9 °C. The enantiomeric excess was determined by HPLC analysis using a chiral stationary phase column [Daicel Chiralcel<sup>®</sup>

OD-H, 254 nm, *n*-hexane/*i*PrOH = 95:5 as the eluent, flow rate: 1 mL/min, retention times: 11.0 min (minor isomer) and 12.8 min (major isomer)].  $^1\text{H}$  NMR (400 MHz,  $\text{CDCl}_3$ , ppm)  $\delta$  8.11 (d,  $J = 8.4$  Hz, 1H), 7.90 – 7.85 (m, 1H), 7.62 – 7.54 (m, 1H), 7.52 (d,  $J = 7.7$  Hz, 1H), 7.50 – 7.45 (m, 3H), 7.38 (d,  $J = 7.1$  Hz, 1H), 7.28 (d,  $J = 7.1$  Hz, 1H), 7.02 (m, 2H), 6.96 (s, 1H), 6.88 (m, 1H), 6.61 (m, 2H), 2.73 (s, 3H), 2.00 (s, 3H);  $^{13}\text{C}$  NMR (101 MHz,  $\text{CDCl}_3$ , ppm)  $\delta$  166.64, 138.05, 137.53, 136.99, 136.90, 135.00, 134.95, 133.01, 132.31, 131.74, 128.54, 128.13, 127.34, 127.04, 126.82, 126.35, 125.32, 125.07, 123.87, 119.36, 20.38, 19.49; MS(ESI):  $m/z$  352  $[\text{M}+\text{H}]^+$

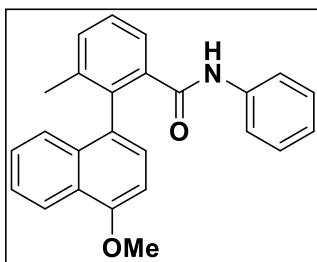

### 2-(4-Methoxynaphthalen-1-yl)-3-methyl-*N*-phenylbenzamide

(3q)

White solid, 56% yield, 72% ee,  $[\alpha]_{\text{D}}^{20} = -52.3$ , M.P.: 218.6 – 219.5 °C. The enantiomeric excess was determined by HPLC analysis using a chiral stationary phase column [Daicel Chiralcel<sup>®</sup>

IA-3, 254 nm, *n*-hexane/*i*PrOH = 90:10 as the eluent, flow rate: 1 mL/min, retention times: 11.1 min (major isomer) and 12.7 min (minor isomer)].  $^1\text{H}$  NMR (400 MHz,  $\text{CDCl}_3$ , ppm)  $\delta$  8.39 (d,  $J = 8.2$  Hz, 1H), 7.91 – 7.79 (m, 1H), 7.53 (m, 2H), 7.49 – 7.42 (m, 3H), 7.29 (d,  $J = 7.8$  Hz, 1H), 7.04 (m, 3H), 6.90 (d,  $J = 7.4$  Hz, 1H), 6.87 (d,  $J = 7.7$  Hz, 1H), 6.65 (m, 2H), 4.01 (s, 3H), 1.99 (s, 3H);  $^{13}\text{C}$  NMR (101 MHz,  $\text{CDCl}_3$ )  $\delta$  166.84, 155.53, 138.51, 137.54, 137.19, 136.75, 132.52, 132.26, 128.65, 128.59, 128.09, 127.92, 127.28, 125.91, 125.79, 124.44, 123.89, 123.00, 119.41, 104.02, 55.64, 20.36; MS(ESI):  $m/z$  368  $[\text{M}+\text{H}]^+$

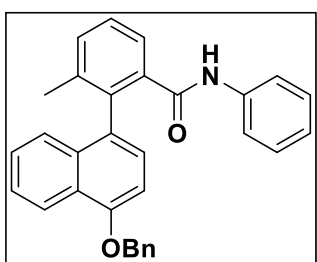

### 2-(4-(Benzyloxy)naphthalen-1-yl)-3-methyl-*N*-phenylbenzamide (3r)

White solid, 60% yield, 70% ee,  $[\alpha]_{\text{D}}^{20} = 47.4$ , M.P.: 71.9 – 73.0 °C. The enantiomeric excess was determined by HPLC analysis using a chiral stationary phase column [Daicel Chiralcel<sup>®</sup> OD-H, 254 nm,

*n*-hexane/*i*PrOH = 90:10 as the eluent, flow rate: 1 mL/min, retention times: 11.8 min (minor isomer) and 13.5 min (major isomer)]. <sup>1</sup>H NMR (400 MHz, CDCl<sub>3</sub>, ppm) δ 8.48 (d, *J* = 8.0 Hz, 1H), 7.91 – 7.80 (m, 1H), 7.57 – 7.48 (m, 4H), 7.47 (m, 3H), 7.44 – 7.34 (m, 3H), 7.26 (d, *J* = 4.7 Hz, 1H), 7.03 (m, 3H), 6.92 (m, 2H), 6.65 (m, 2H), 2.01 (s, 3H); <sup>13</sup>C NMR (101 MHz, CDCl<sub>3</sub>, ppm) δ 166.80, 154.60, 138.48, 137.56, 137.21, 136.81, 136.70, 132.62, 132.27, 128.97, 128.67, 128.60, 128.12, 128.07, 127.99, 127.35, 127.31, 127.22, 126.08, 125.88, 124.48, 123.89, 123.22, 119.40, 105.39, 99.99, 70.25, 20.38; MS(ESI): *m/z* 444 [M+H]<sup>+</sup>

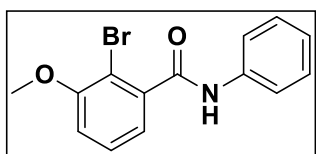

**2-Bromo-3-methoxy-*N*-phenylbenzamide (4i)**

<sup>1</sup>H NMR (400 MHz, CDCl<sub>3</sub>, ppm) δ 7.65 (m, 3H), 7.39 (m, 3H), 7.25 – 7.14 (m, 2H), 7.01 (d, *J* = 8.2 Hz, 1H), 3.95 (s, 3H); <sup>13</sup>C NMR (101 MHz, CDCl<sub>3</sub>, ppm) δ 165.69, 156.23, 139.82, 137.56, 129.13, 128.79, 124.83, 121.10, 120.05, 113.25, 109.18, 56.62.

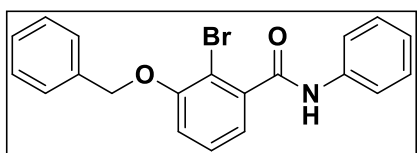

**3-(Benzyloxy)-2-bromo-*N*-phenylbenzamide (4j)**

<sup>1</sup>H NMR (400 MHz, CDCl<sub>3</sub>, ppm) δ 7.65 (m, 2H), 7.60 (s, 1H), 7.49 (m, 2H), 7.42 (m, 2H), 7.38 8.7 Hz(m, 2H), 7.35 (m, 1H), 7.32 (d, *J* = 8.0 Hz, 1H), 7.21 (dd, *J* = 7.7, 1.4 Hz, 1H), 7.18 (m, 1H), 7.03 (dd, *J* = 8.2, 1.2 Hz, 1H), 5.21 (s, 2H); <sup>13</sup>C NMR (101 MHz, CDCl<sub>3</sub>, ppm) δ 165.64, 155.35, 139.91, 137.56, 136.07, 129.15, 128.69, 128.14, 127.02, 124.85, 121.46, 120.04, 115.09, 109.96, 71.19.

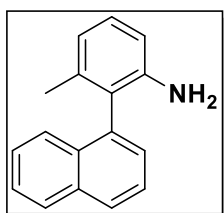

**3-Methyl-2-(naphthalen-1-yl)aniline (5a)**

Colourless oil : Known compound: <sup>1</sup>H NMR (400 MHz, CDCl<sub>3</sub>) δ 7.90 (m, 2H), 7.57 (m, 1H), 7.54 – 7.46 (m, 2H), 7.44 – 7.36 (m, 2H), 7.17 (m, 1H), 6.79 (d, *J* = 7.5 Hz, 1H), 6.71 (d, *J* = 8.0 Hz, 1H), 1.89 (s, 3H); <sup>13</sup>C NMR (101 MHz, CDCl<sub>3</sub>) δ 144.43, 137.98, 135.77, 134.09, 131.86, 128.38, 128.30, 127.90, 127.65, 126.40, 126.11, 126.06, 125.56, 125.33, 120.10, 112.91, 20.26.

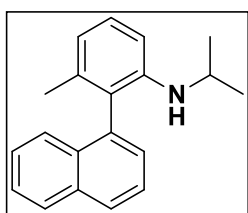

***N*-Isopropyl-3-methyl-2-(naphthalen-1-yl)aniline (5b)**

Yellow oil, 99% yield, 10% ee, [ $\alpha$ ]<sub>D</sub><sup>20</sup> = 29.8, The enantiomeric excess was determined by HPLC analysis using a chiral stationary phase column [Daicel Chiralcel<sup>®</sup> OD-H, 254 nm, *n*-hexane/*i*PrOH = 99:1 as the eluent, flow rate: 1 mL/min, retention times: 5.9 min (major isomer) and 6.2 min (minor isomer)]. <sup>1</sup>H NMR (400 MHz, CDCl<sub>3</sub>, ppm) δ 7.89 (m, 2H), 7.56 (m, 1H), 7.47 (m, 2H), 7.36 (m, 2H), 7.23 (m, 1H), 6.72 – 6.64 (m, 2H), 3.63 – 3.50 (m, 1H), 2.92 (s, 1H), 1.82 (s, 3H), 0.97 (d, *J* = 6.3 Hz, 3H), 0.89 (d, *J* = 6.3 Hz, 3H); <sup>13</sup>C NMR (101 MHz, CDCl<sub>3</sub>, ppm) δ 145.67, 137.66, 134.11, 132.11, 128.42, 128.31, 128.11, 127.87, 126.25, 126.12, 125.51, 118.40, 109.17, 44.57, 22.97, 22.73, 20.49; MS(ESI): *m/z* 276 [M+H]<sup>+</sup>

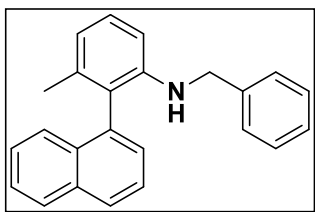

### ***N*-Benzyl-3-methyl-2-(naphthalen-1-yl)aniline (5c)**

Yellow oil, 99% yield, 10% ee,  $[\alpha]_D^{20} = 1.7$ . The enantiomeric excess was determined by HPLC analysis using a chiral stationary phase column [Daicel Chiralcel<sup>®</sup> IA-3, 254 nm, *n*-hexane/*i*PrOH = 99:1 as the eluent, flow rate: 0.8 mL/min, retention times: 6.08 min (major isomer) and 9.1 min (minor isomer)]. <sup>1</sup>H NMR (400 MHz, CDCl<sub>3</sub>, ppm) δ 7.94 (m, 2H), 7.62 (d, *J* = 7.0 Hz, 1H), 7.59 (d, *J* = 8.1 Hz, 1H), 7.56 – 7.52 (m, 1H), 7.47 – 7.42 (m, 2H), 7.28 – 7.25 (m, 1H), 7.24 (d, *J* = 5.8 Hz, 1H), 7.20 (m, 2H), 7.17 – 7.13 (m, 2H), 6.76 (d, *J* = 7.5 Hz, 1H), 6.59 (d, *J* = 8.2 Hz, 1H), 4.26 (s, 2H), 1.90 (s, 3H); <sup>13</sup>C NMR (101 MHz, CDCl<sub>3</sub>, ppm) δ 145.69, 139.53, 137.60, 135.61, 134.18, 132.14, 128.46, 128.41, 128.05, 128.03, 126.88, 126.39, 126.21, 126.17, 125.49, 119.11, 108.68, 48.06, 20.35; MS(ESI): *m/z* 324 [M+H]<sup>+</sup>

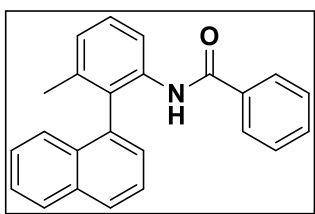

### ***N*-(3-Methyl-2-(naphthalen-1-yl)phenyl)benzamide (5d)**

White solid, 94% yield, 22% ee,  $[\alpha]_D^{20} = 31.0$ , M.P.: 111.9 - 112.7 °C. The enantiomeric excess was determined by HPLC analysis using a chiral stationary phase column [Daicel Chiralcel<sup>®</sup> AD-H, 254 nm, *n*-hexane/*i*PrOH = 97:3 as the eluent, flow rate: 1 mL/min, retention times: 18.2 min (minor isomer) and 22.4 min (major isomer)]. <sup>1</sup>H NMR (400 MHz, CDCl<sub>3</sub>, ppm) δ 8.33 (d, *J* = 8.2 Hz, 1H), 7.95 (m, 2H), 7.61 (m, 1H), 7.55 – 7.44 (m, 5H), 7.40 (m, 1H), 7.30 (m, 1H), 7.15 (m, 2H), 7.07 (m, 2H), 6.88 (d, *J* = 8.3 Hz, 1H), 3.67 (s, 3H); <sup>13</sup>C NMR (101 MHz, CDCl<sub>3</sub>, ppm) δ 164.83, 157.57, 137.35, 134.77, 134.01, 132.04, 131.48, 131.31, 129.64, 128.90, 128.66, 128.53, 126.88, 126.52, 126.42, 125.85, 125.46, 118.51, 113.05, 107.01, 55.90; MS(ESI): *m/z* 338 [M+H]<sup>+</sup>

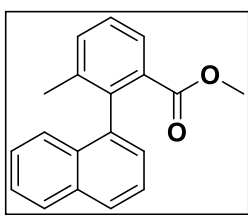

### **Methyl 3-methyl-2-(naphthalen-1-yl)benzoate (5e)**

White solid, 77% yield, 35% ee,  $[\alpha]_D^{20} = -10.7$ , M.P.: 79.0 - 80.1 °C. The enantiomeric excess was determined by HPLC analysis using a chiral stationary phase column [Daicel Chiralcel<sup>®</sup> AD-H, 254 nm, *n*-hexane/*i*PrOH = 95:5 as the eluent, flow rate: 1 mL/min, retention times: 5.5 min (minor isomer) and 6.0 min (major isomer)]. <sup>1</sup>H NMR (400 MHz, CDCl<sub>3</sub>, ppm) δ 7.97 (d, *J* = 8.2 Hz, 1H), 7.94 (m, 2H), 7.60 (d, *J* = 7.3 Hz, 1H), 7.55 (m, 2H), 7.50 (d, *J* = 7.9 Hz, 1H), 7.43 (m, 2H), 7.31 (d, *J* = 7.0 Hz, 1H), 3.42 (s, 3H), 2.03 (s, 3H); <sup>13</sup>C NMR (101 MHz, CDCl<sub>3</sub>, ppm) δ 168.17, 140.43, 138.43, 138.34, 133.40, 132.11, 128.35, 127.55, 127.54, 127.47, 126.09, 125.86, 125.70, 125.51, 125.37, 51.70, 20.40; MS(ESI): *m/z* 299 [M+Na]<sup>+</sup>

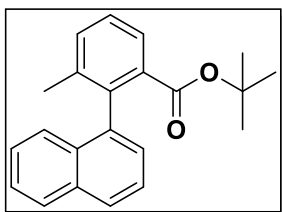

### **tert-Butyl 3-methyl-2-(naphthalen-1-yl)benzoate (5f)**

Off white solid, 90% yield, 70% ee,  $[\alpha]_D^{20} = 4.2$ , M.P.: 86.2 - 87.4 °C. The enantiomeric excess was determined by HPLC analysis using a chiral stationary phase column [Daicel Chiralcel<sup>®</sup> AD-H, 254 nm, *n*-hexane/*i*PrOH = 97:3 as the eluent, flow rate: 1 mL/min, retention times: 4.32 min (major isomer) and 4.65 min (minor isomer)]. <sup>1</sup>H NMR (400 MHz, CDCl<sub>3</sub> ppm) δ 7.77 (dd, *J* = 7.3, 1.5 Hz, 1H), 7.53 (m, 1H), 7.52 – 7.48 (m, 1H), 7.48 – 7.42 (m, 3H), 7.42 – 7.36 (m, 1H), 7.26 (dd, *J* = 7.0, 1.0 Hz, 1H), 1.99 (s, 3H), 0.79 (s, 9H); <sup>13</sup>C NMR (101 MHz, CDCl<sub>3</sub> ppm) δ 168.18, 138.95, 138.71, 137.89, 134.91, 133.49, 132.45, 132.43, 128.05, 127.49, 127.27, 126.92, 126.15, 126.10, 126.00, 125.71, 125.37, 80.66, 27.09, 20.36; MS(ESI): *m/z* 319 [M+H]<sup>+</sup>

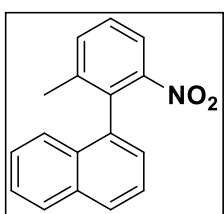

### **1-(2-Methyl-6-nitrophenyl)naphthalene (5g)**

Yellow solid, 98% yield, 75% ee,  $[\alpha]_D^{20} = 121.1$ , M.P.: 98.0 - 99.1 °C. The enantiomeric excess was determined by HPLC analysis using a chiral stationary phase column [Daicel Chiralcel<sup>®</sup> OD-H, 254 nm, *n*-hexane/*i*PrOH = 95:5 as the eluent, flow rate: 1 mL/min, retention times: 6.44 min (minor isomer) and 7.4 min (major isomer)]. <sup>1</sup>H NMR (400 MHz, CDCl<sub>3</sub>, ppm) δ 7.89 (m, 2H), 7.82 (d, *J* = 8.0 Hz, 1H), 7.55 (d, *J* = 7.6 Hz, 1H), 7.48 (m, 3H), 7.39 (m, 1H), 7.33 (d, *J* = 8.4 Hz, 1H), 7.24 (d, *J* = 6.9 Hz, 1H), 1.97 (s, 3H); <sup>13</sup>C NMR (101 MHz, CDCl<sub>3</sub>, ppm) δ 150.79, 140.34, 133.99, 133.96, 133.93, 133.54, 131.61, 128.55, 128.50, 128.24, 126.62, 126.08, 125.96, 125.43, 124.91, 121.43, 20.27; MS(ESI): *m/z* 286 [M+Na]<sup>+</sup>

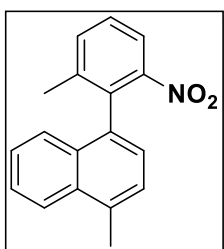

### **1-Methyl-4-(2-methyl-6-nitrophenyl)naphthalene (5h)**

Yellow solid, 97% yield, 83% ee,  $[\alpha]_D^{20} = 65.5$ , M.P.: 84.4 - 85.2 °C. The enantiomeric excess was determined by HPLC analysis using a chiral stationary phase column [Daicel Chiralcel<sup>®</sup> OD-H, 254 nm, *n*-hexane/*i*PrOH = 98:2 as the eluent, flow rate: 1 mL/min, retention times: 6.74 min (minor isomer) and 7.22 min (major isomer)]. <sup>1</sup>H NMR (400 MHz, CDCl<sub>3</sub> ppm) δ 8.10 (d, *J* = 8.4 Hz, 1H), 7.83 (d, *J* = 8.0 Hz, 1H), 7.58 (m, 1H), 7.57 – 7.53 (m, 1H), 7.50 (m, 1H), 7.47 – 7.41 (m, 1H), 7.41 – 7.35 (m, 2H), 7.17 (d, *J* = 7.1 Hz, 1H), 2.78 (s, 3H), 2.02 (s, 3H); <sup>13</sup>C NMR (101 MHz, CDCl<sub>3</sub> ppm) δ 150.99, 140.48, 134.88, 134.21, 133.78, 132.72, 132.09, 131.65, 128.10, 126.21, 125.87, 125.66, 125.52, 124.69, 121.30, 20.30, 19.56; MS(ESI): *m/z* 278 [M+H]<sup>+</sup>

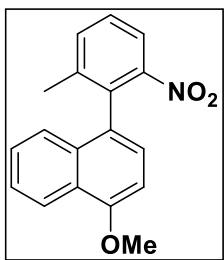

### 1-Methoxy-4-(2-methyl-6-nitrophenyl)naphthalene (5i)

Yellow solid, 98% yield, 85% ee,  $[\alpha]_D^{20} = 72.7$ , M.P.: 87.8 - 89.1 °C. The enantiomeric excess was determined by HPLC analysis using a chiral stationary phase column [Daicel Chiralcel<sup>®</sup> OD-H, 254 nm, *n*-hexane/*i*PrOH = 98:2 as the eluent, flow rate: 1 mL/min, retention times: 6.57 min (minor isomer) and 8.09 min (major isomer)]. <sup>1</sup>H NMR (400 MHz, CDCl<sub>3</sub>, ppm) δ 8.38 (d, *J* = 8.4 Hz, 1H), 7.79 (d, *J* = 8.0 Hz, 1H), 7.59 – 7.55 (m, 1H), 7.54 – 7.47 (m, 2H), 7.44 (dd, *J* = 7.9, 1.1 Hz, 1H), 7.31 (d, *J* = 8.3 Hz, 1H), 7.18 (dd, *J* = 7.8, 1.2 Hz, 1H), 6.87 (d, *J* = 7.9 Hz, 1H), 4.07 (s, 3H), 2.03 (s, 3H); <sup>13</sup>C NMR (101 MHz, CDCl<sub>3</sub>, ppm) δ 155.62, 151.37, 140.84, 133.92, 133.62, 132.56, 128.04, 127.07, 126.08, 125.78, 125.69, 125.35, 124.74, 122.52, 121.16, 103.35, 55.53, 20.27; MS(ESI): *m/z* 294 [M+H]<sup>+</sup>

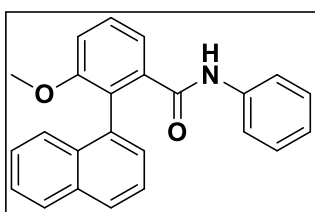

### 3-Methoxy-2-(naphthalen-1-yl)-*N*-phenylbenzamide (3s)

White solid, 65% yield, 18% ee,  $[\alpha]_D^{20} = -1.4$ , M.P.: 74.0 – 74.9 °C. The enantiomeric excess was determined by HPLC analysis using a chiral stationary phase column [Daicel Chiralcel<sup>®</sup> OD-H, 254 nm, *n*-hexane/*i*PrOH = 95:5 as the eluent, flow rate: 1 mL/min, retention times: 11.8 min (minor isomer) and 13.1 min (major isomer)]. <sup>1</sup>H NMR (400 MHz, CDCl<sub>3</sub>, ppm) δ 7.94 (d, *J* = 8.1 Hz, 1H), 7.90 (d, *J* = 8.2 Hz, 1H), 7.66 (d, *J* = 7.1 Hz, 1H), 7.56 (m, 2H), 7.55 – 7.50 (m, 2H), 7.48 (d, *J* = 8.1 Hz, 1H), 7.43 (d, *J* = 7.1 Hz, 1H), 7.18 (d, *J* = 8.2 Hz, 1H), 7.03 (m, 2H), 6.89 (m, 1H), 6.83 (s, 1H), 6.60 (m, 2H), 3.65 (s, 3H); <sup>13</sup>C NMR (101 MHz, CDCl<sub>3</sub>, ppm) δ 166.08, 157.51, 137.97, 137.29, 133.96, 133.69, 132.16, 129.58, 128.71, 128.60, 128.58, 127.75, 127.05, 126.43, 126.33, 125.96, 125.11, 124.07, 121.80, 119.53, 113.16, 56.08; MS(ESI): *m/z* 354 [M+H]<sup>+</sup>

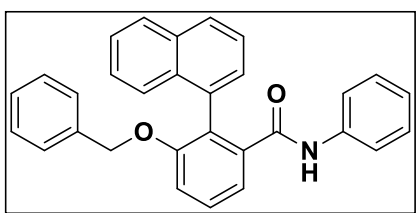

### 3-(Benzyloxy)-2-(naphthalen-1-yl)-*N*-phenylbenzamide (3t)

White solid, 60% yield, 23% ee,  $[\alpha]_D^{20} = -8.6$ , M.P.: 93.3 – 94.5 °C. The enantiomeric excess was determined by HPLC analysis using a chiral stationary phase column [Daicel Chiralcel<sup>®</sup> IC-3, 254 nm, *n*-hexane/*i*PrOH = 90:10 as the eluent, flow rate: 1 mL/min, retention times: 22.9 min (minor isomer) and 24.6 min (major isomer)]. <sup>1</sup>H NMR (400 MHz, CDCl<sub>3</sub>, ppm) δ 7.96 (d, *J* = 8.1 Hz, 1H), 7.91 (d, *J* = 8.2 Hz, 1H), 7.68 (d, *J* = 7.7 Hz, 1H), 7.64 (d, *J* = 8.3 Hz, 1H), 7.54 (m, 2H), 7.51 (d, *J* = 4.3 Hz, 1H), 7.47 (m, 2H), 7.19 (d, *J* = 8.2 Hz, 1H), 7.17 – 7.12 (m, 3H), 7.04 (m, 2H), 6.95 (s, 1H), 6.90 (m, 3H), 6.64 (m, 2H), 4.99 (s, 2H); <sup>13</sup>C NMR (101 MHz, CDCl<sub>3</sub>, ppm) δ 165.93, 156.42, 137.92, 137.33, 136.64, 134.01, 133.72, 132.23, 129.49, 128.68, 128.59, 128.25, 127.78, 127.54, 127.28, 127.05, 126.46, 126.34, 125.92, 125.24, 124.08, 122.29, 119.55, 115.31, 70.48; MS(ESI): *m/z* 430 [M+H]<sup>+</sup>

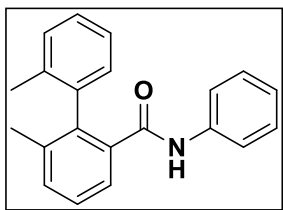

**2',6-Dimethyl-N-phenyl-[1,1'-biphenyl]-2-carboxamide (3u)**

White solid, 60% yield, 11% ee,  $[\alpha]_D^{20} = 4.2$ , M.P.: 143.2 - 144.1 °C.

The enantiomeric excess was determined by HPLC analysis using a chiral stationary phase column [Daicel Chiralcel® OD-H, 254 nm, *n*-hexane/*i*PrOH = 95:5 as the eluent, flow rate: 1 mL/min, retention

times: 11.0 min (minor isomer) and 12.8 min (major isomer)]. <sup>1</sup>H NMR (400 MHz, CDCl<sub>3</sub>, ppm) δ 7.95 (dd, *J* = 7.4, 1.2 Hz, 1H), 7.44 (dd, *J* = 7.4, 1.5 Hz, 1H), 7.42 (d, *J* = 7.4 Hz, 1H), 7.39 – 7.35 (m, 3H), 7.22 (d, *J* = 8.5 Hz, 1H), 7.18 (m, 2H), 7.07 – 7.02 (m, 2H), 7.02 – 6.98 (m, 1H), 2.06 (s, 3H), 2.04 (s, 3H); <sup>13</sup>C NMR (101 MHz, CDCl<sub>3</sub>, ppm) δ 166.07, 138.92, 138.18, 137.73, 136.74, 136.54, 134.76, 132.79, 131.16, 129.03, 128.76, 128.61, 127.85, 127.71, 126.89, 124.13, 119.86, 20.44, 19.71; MS(ESI): *m/z* 302 [M+H]<sup>+</sup>

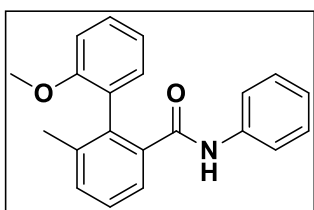

**2'-Methoxy-6-methyl-N-phenyl-[1,1'-biphenyl]-2-carboxamide (3v)**

White solid, 99% yield, 0% ee,  $[\alpha]_D^{20} = 1.6$ , M.P.: 114.2 – 115.8 °C.

The enantiomeric excess was determined by HPLC analysis using a chiral stationary phase column [Daicel Chiralcel® OD-H, 254 nm, *n*-hexane/*i*PrOH = 95:5 as the eluent, flow rate: 1 mL/min, retention times: 11.8 min and 13.5 min]. <sup>1</sup>H NMR (400 MHz, CDCl<sub>3</sub>, ppm) δ 7.70 (dd, *J* = 6.4, 1.8 Hz, 1H), 7.48 (s, 1H), 7.42 – 7.32 (m, 3H), 7.20 (m, 2H), 7.17 – 7.11 (m, 3H), 7.05 (d, *J* = 7.4 Hz, 1H), 7.03 – 6.98 (m, 2H), 3.82 (s, 3H), 2.06 (s, 3H); <sup>13</sup>C NMR (101 MHz, CDCl<sub>3</sub>, ppm) δ 167.34, 156.04, 137.86, 137.62, 136.90, 135.18, 131.89, 130.80, 129.72, 128.79, 127.81, 126.35, 124.04, 121.67, 119.68, 111.08, 55.70, 20.36; MS(ESI): *m/z* 318 [M+H]<sup>+</sup>

## Copies of NMR spectra

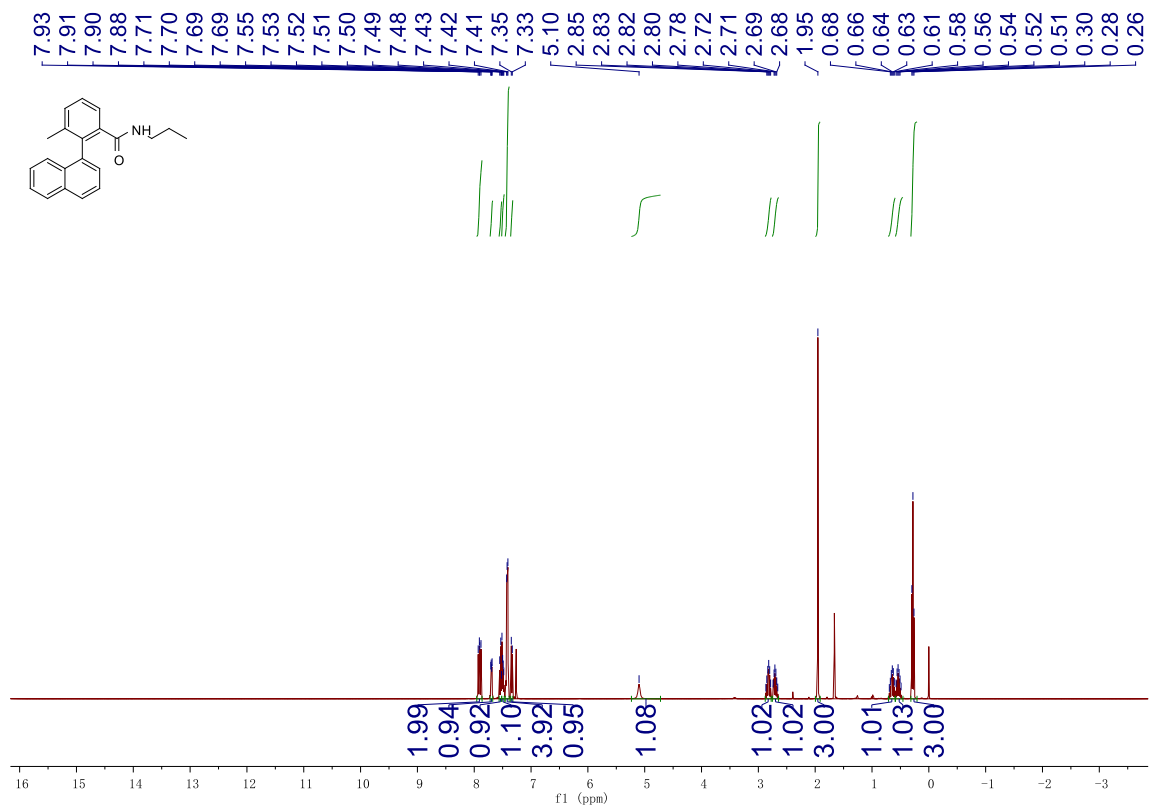

**<sup>1</sup>H NMR Spectrum of 3-methyl-2-(naphthalen-1-yl)-N-propylbenzamide (3a)**

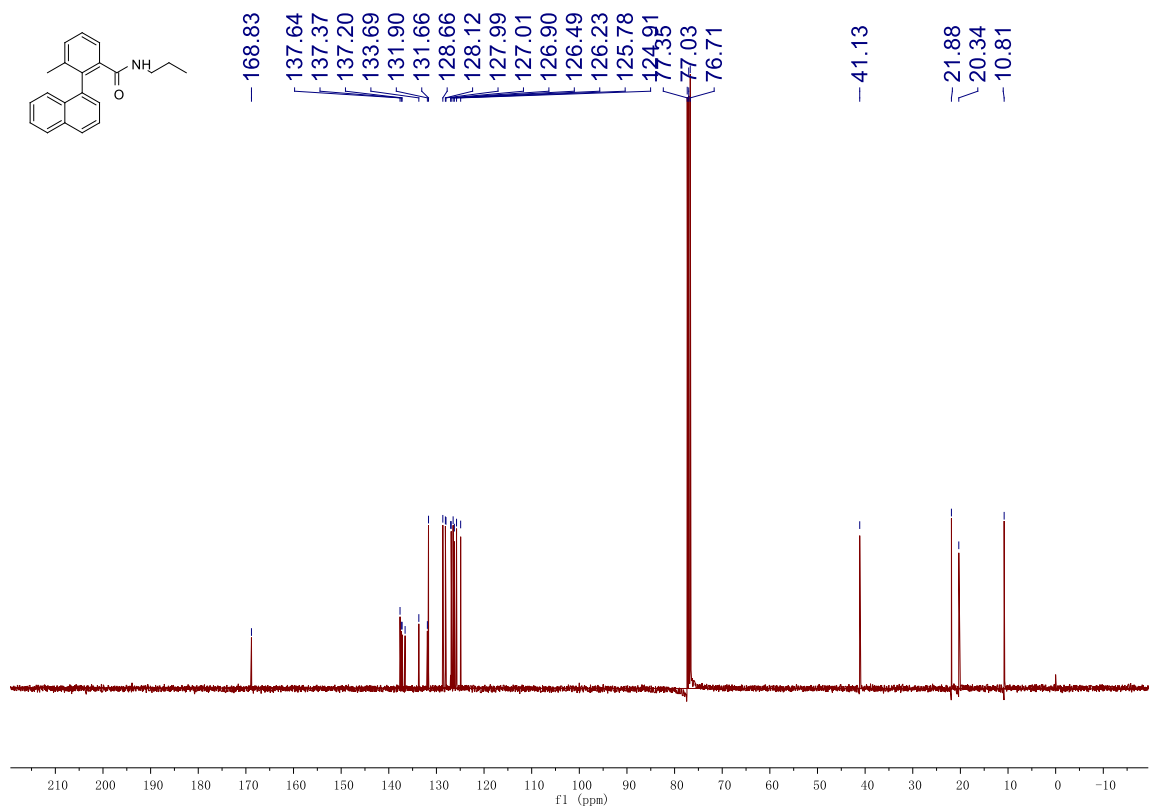

**<sup>13</sup>C NMR Spectrum of 3-methyl-2-(naphthalen-1-yl)-N-propylbenzamide (3a)**

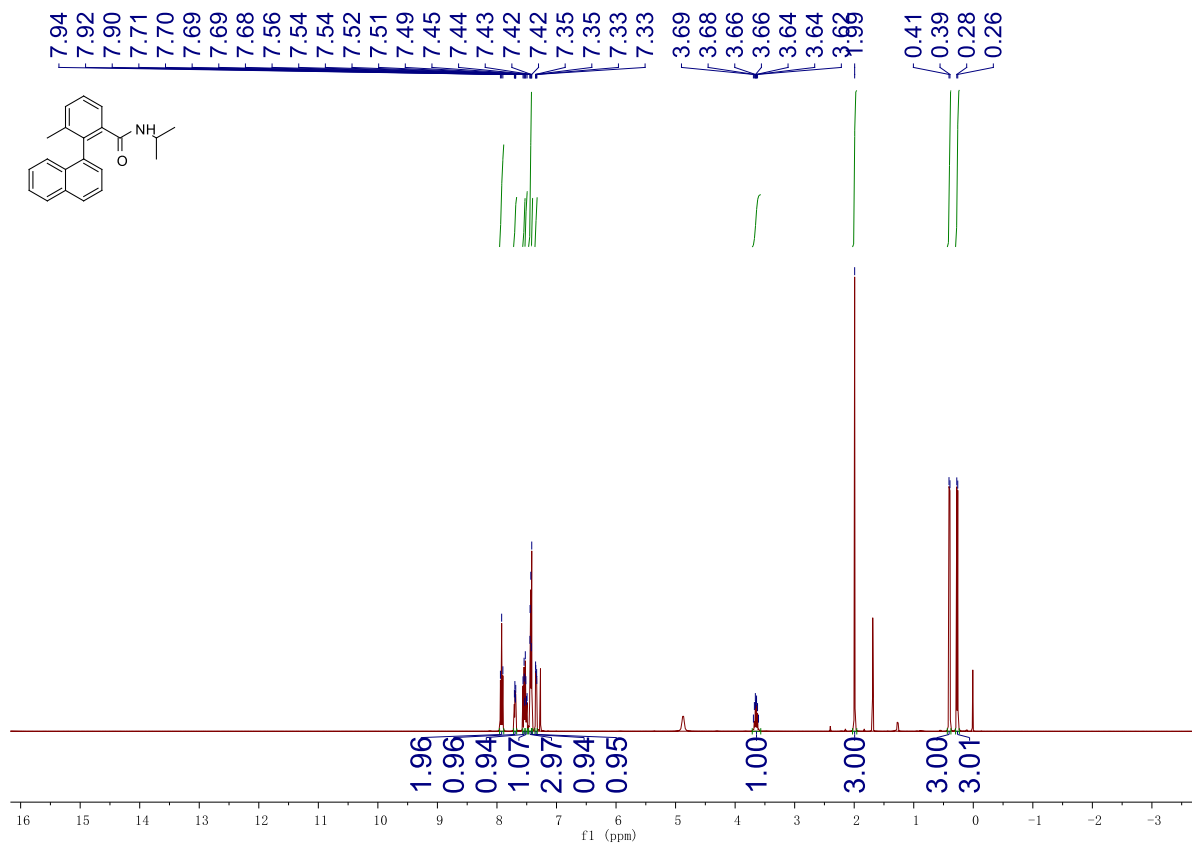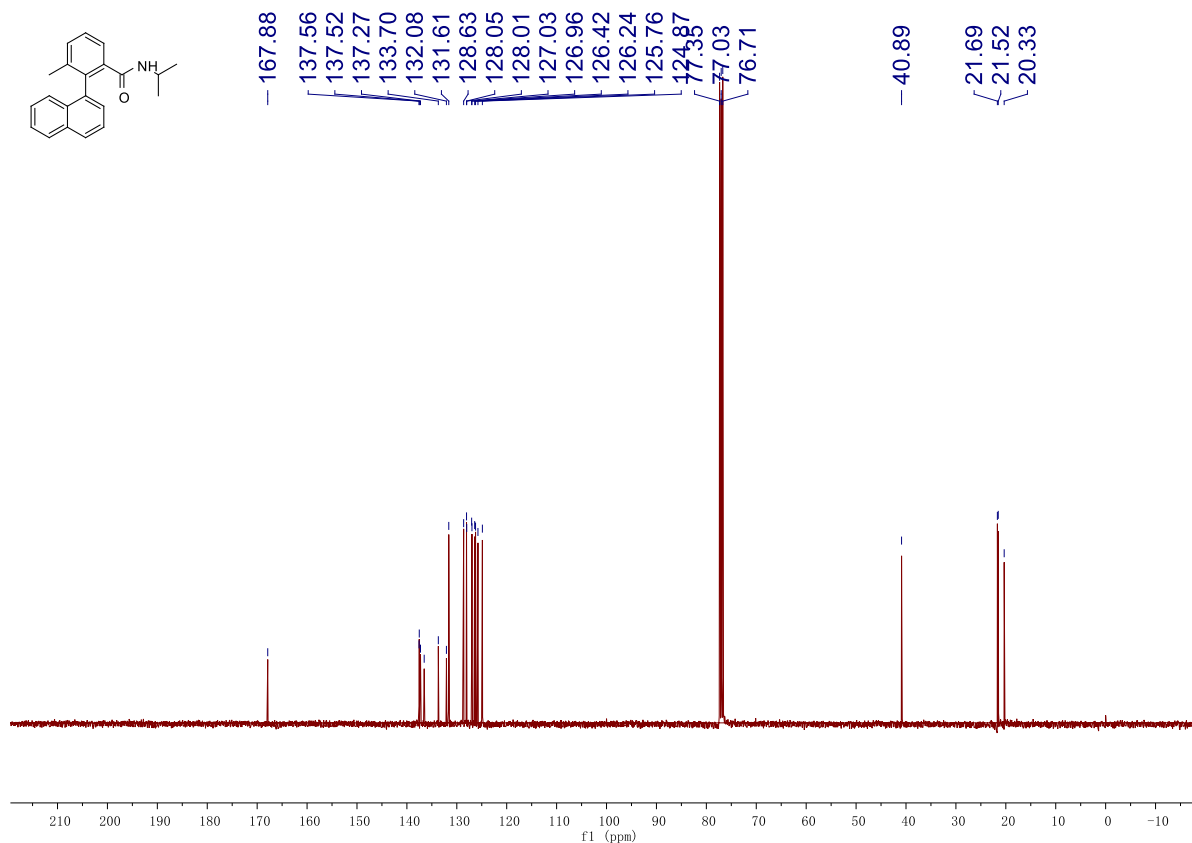



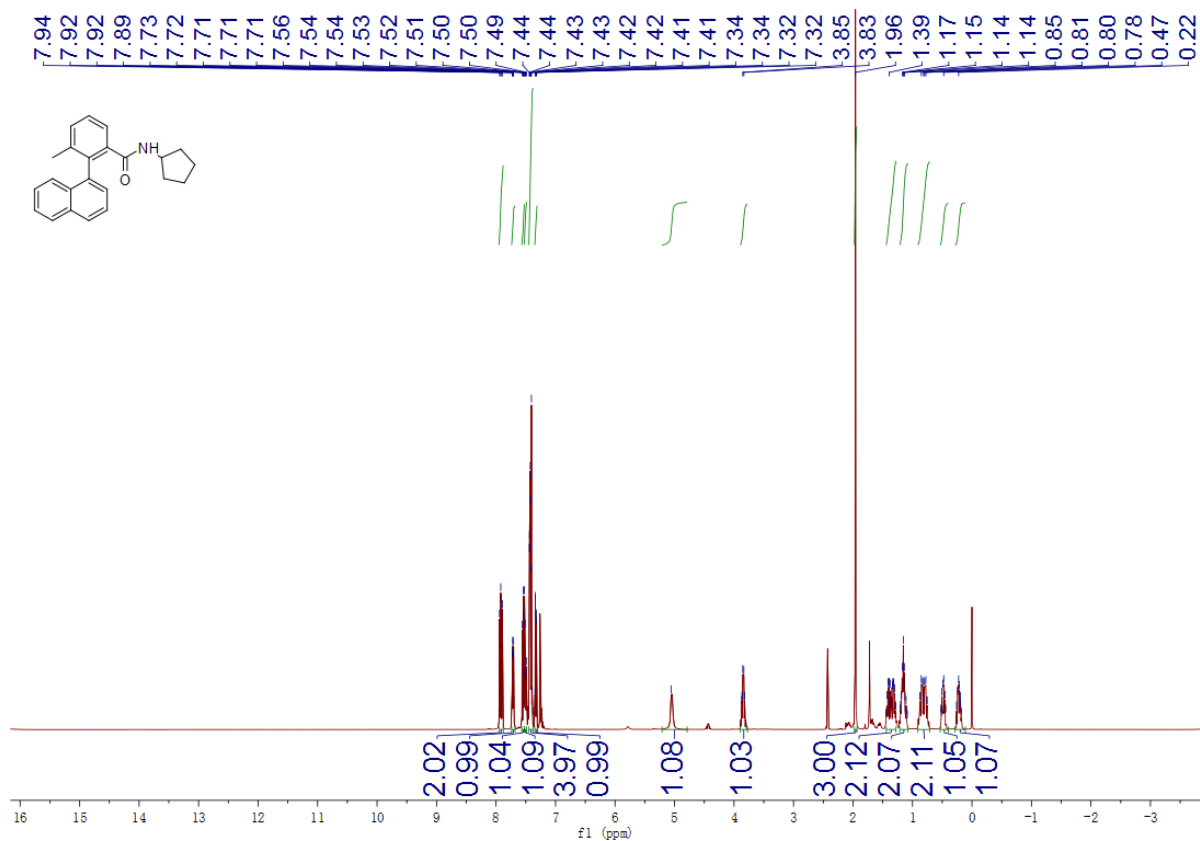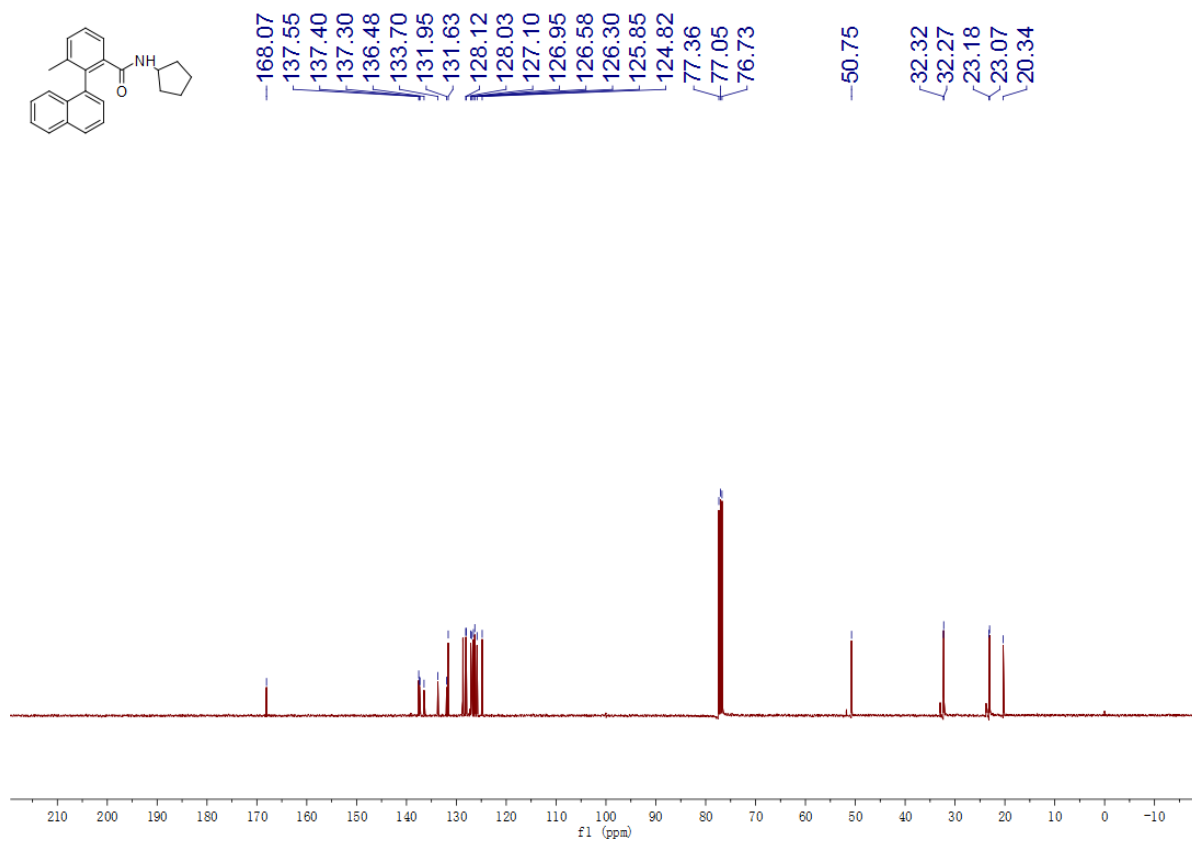

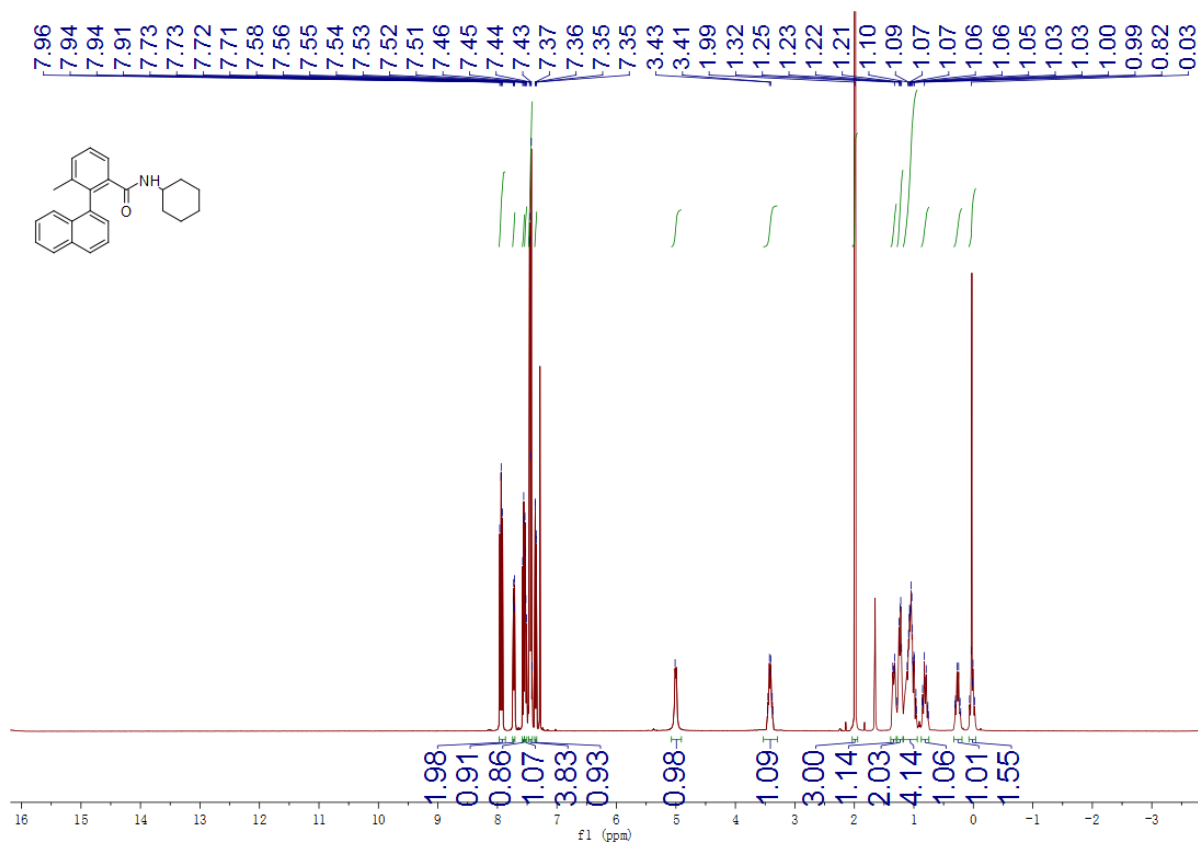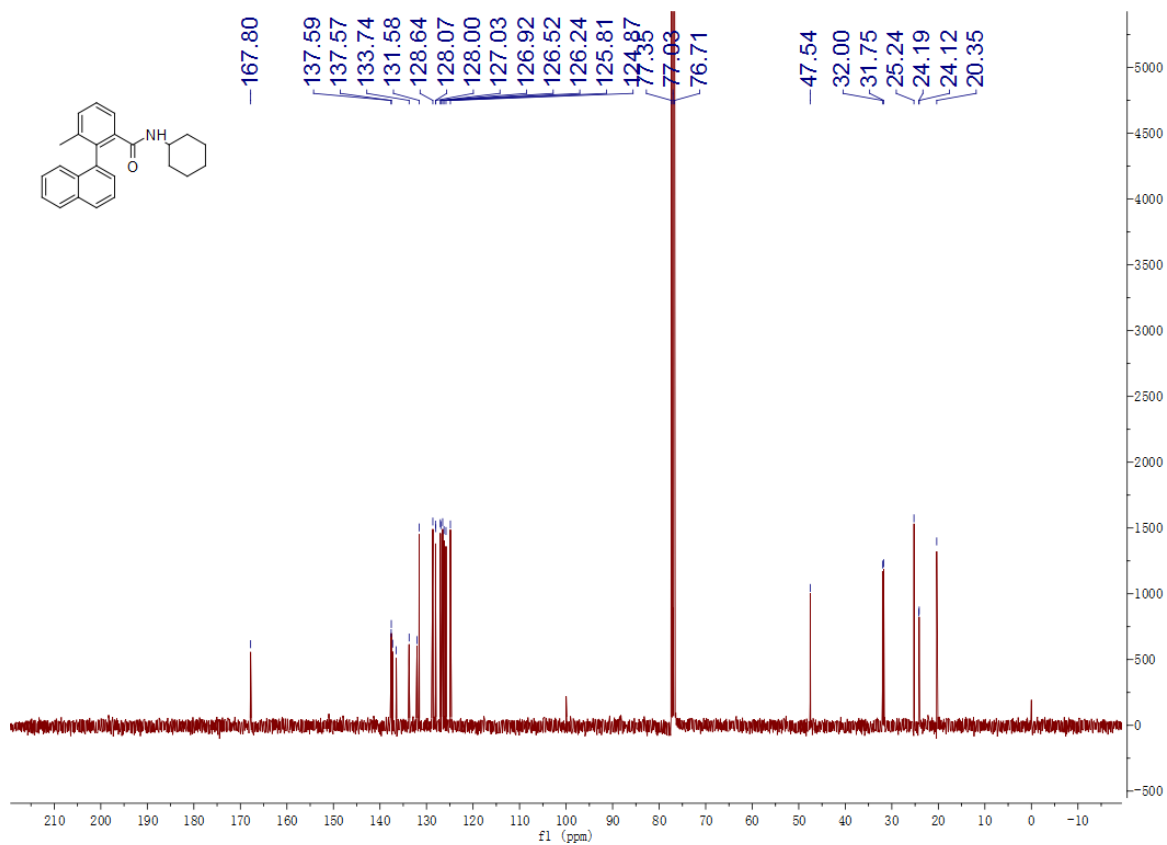

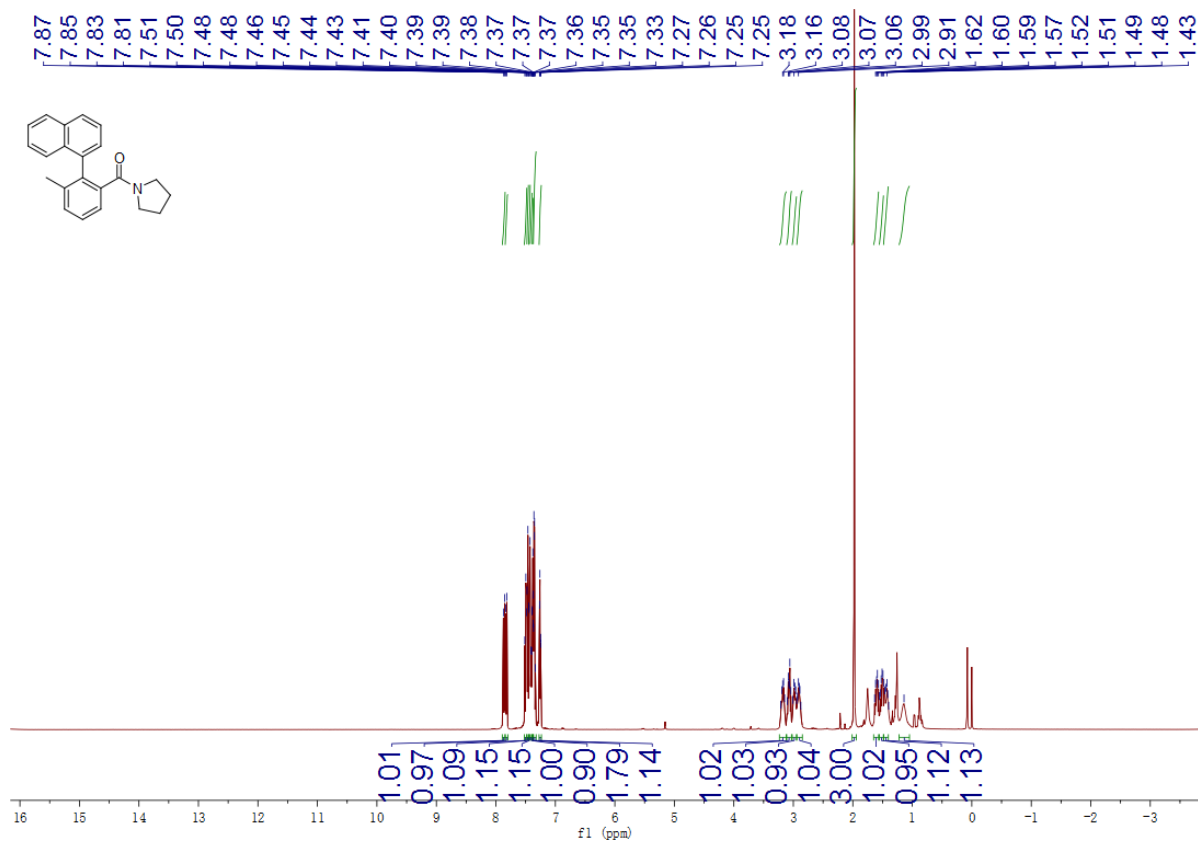

**<sup>1</sup>H NMR Spectrum of 3-methyl-2-(naphthalen-1-yl)phenyl(pyrrolidin-1-yl)methanone (3e)**

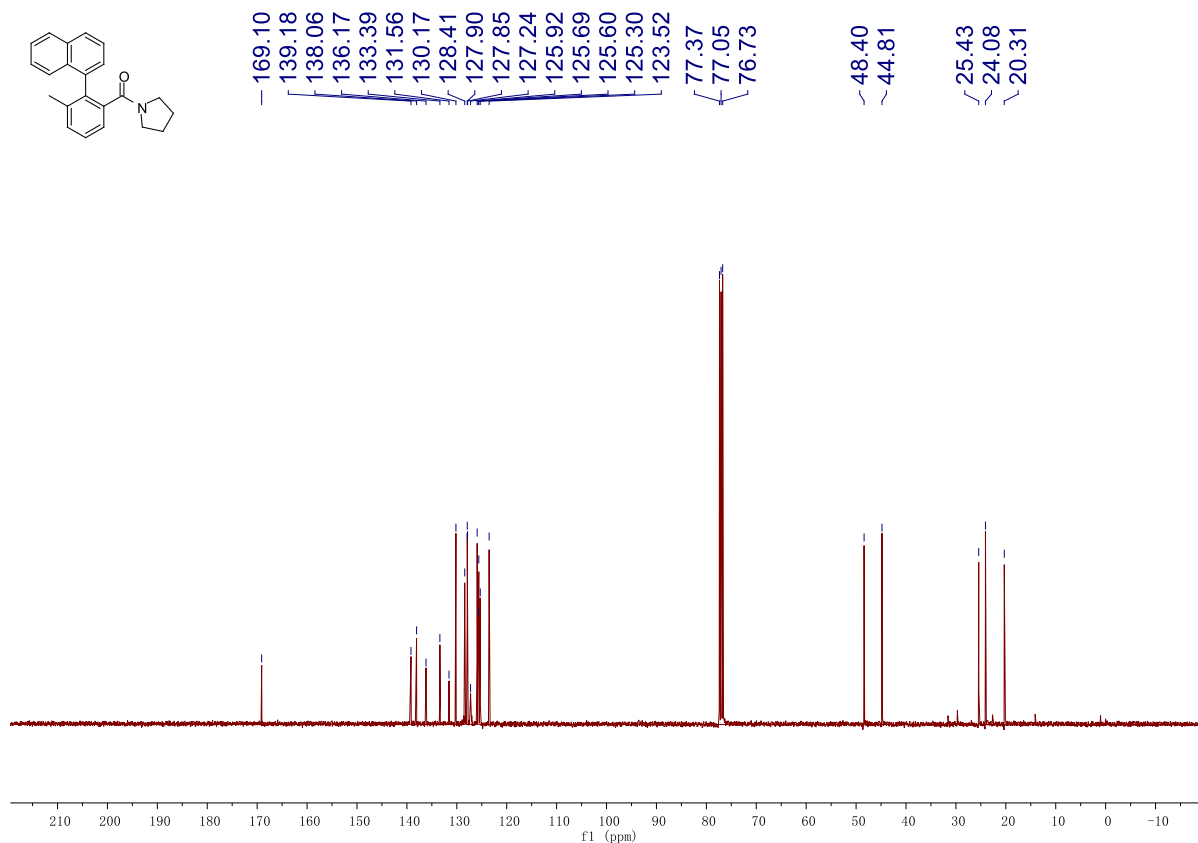

**<sup>13</sup>C NMR Spectrum of 3-methyl-2-(naphthalen-1-yl)phenyl(pyrrolidin-1-yl)methanone (3e)**

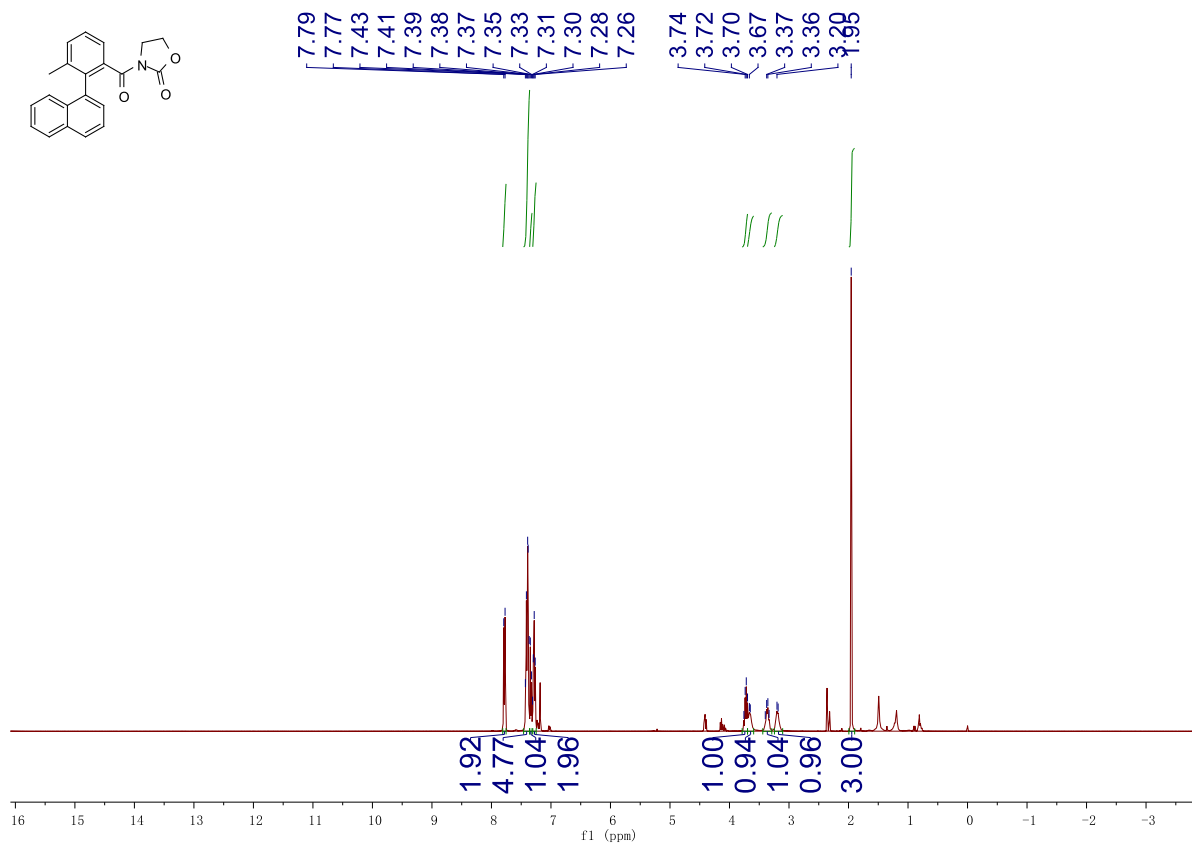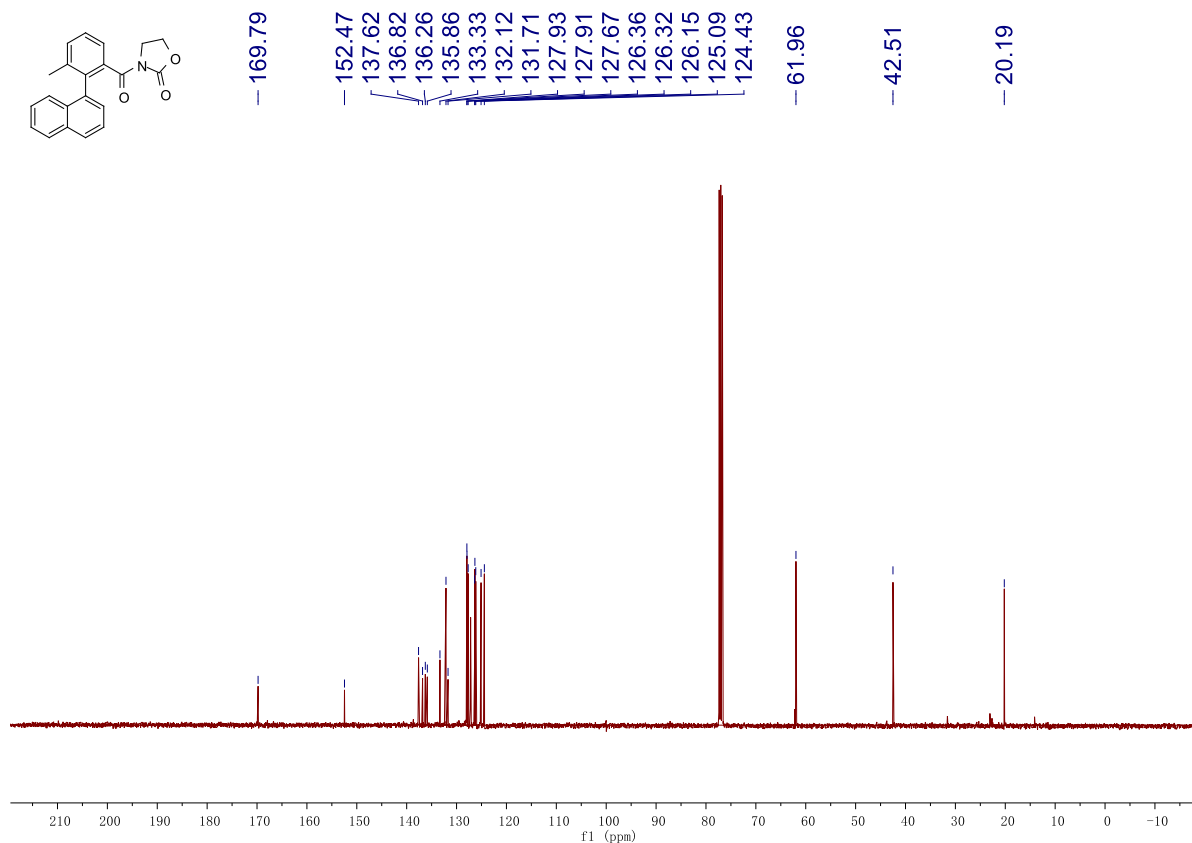

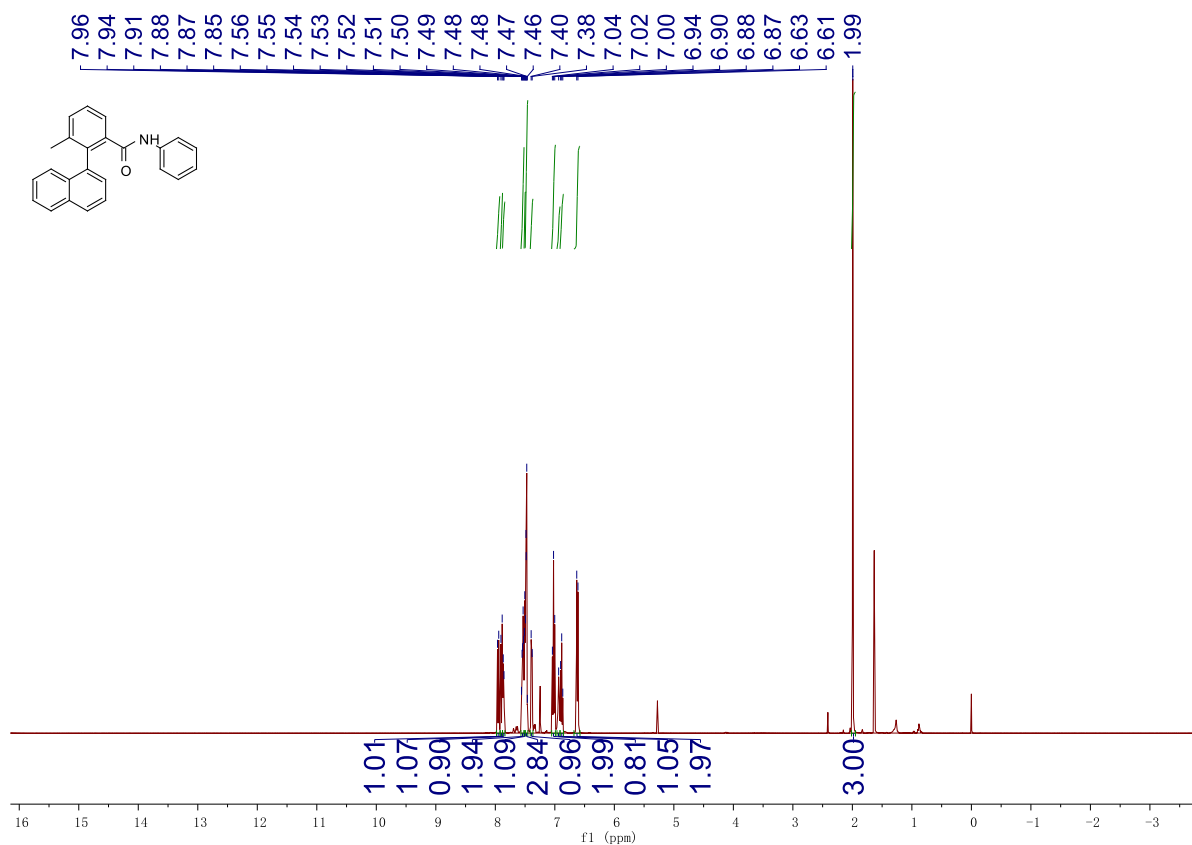

**<sup>1</sup>H NMR Spectrum of 3-methyl-2-(naphthalen-1-yl)-N-phenylbenzamide (3g)**

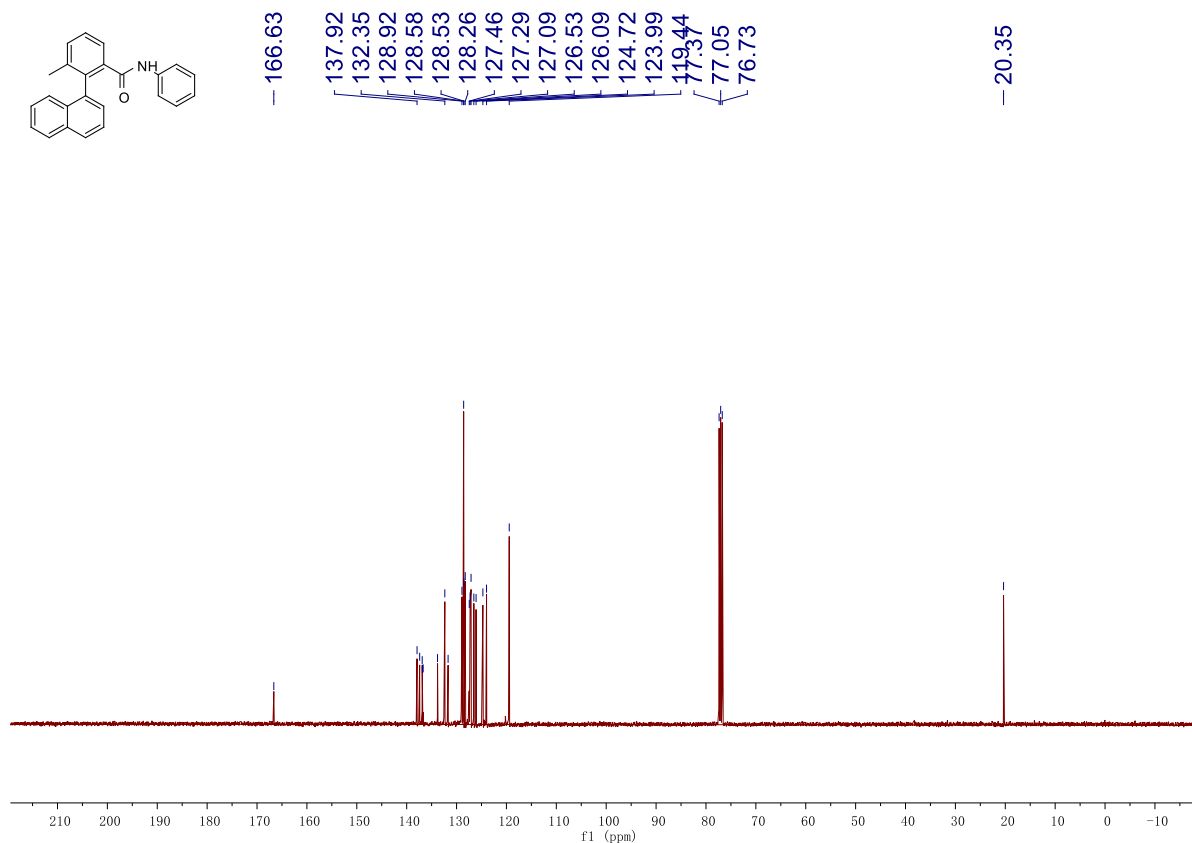

**<sup>13</sup>C NMR Spectrum of 3-methyl-2-(naphthalen-1-yl)-N-phenylbenzamide (3g)**

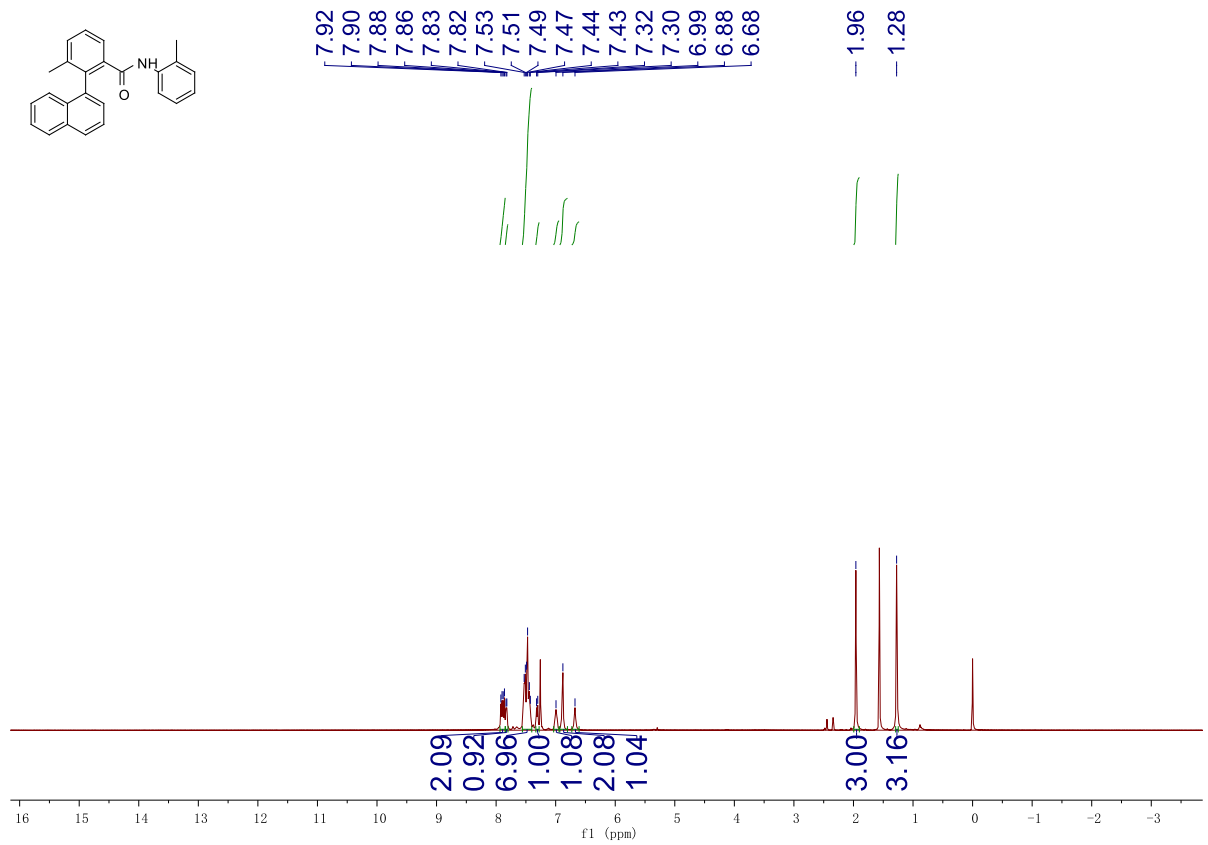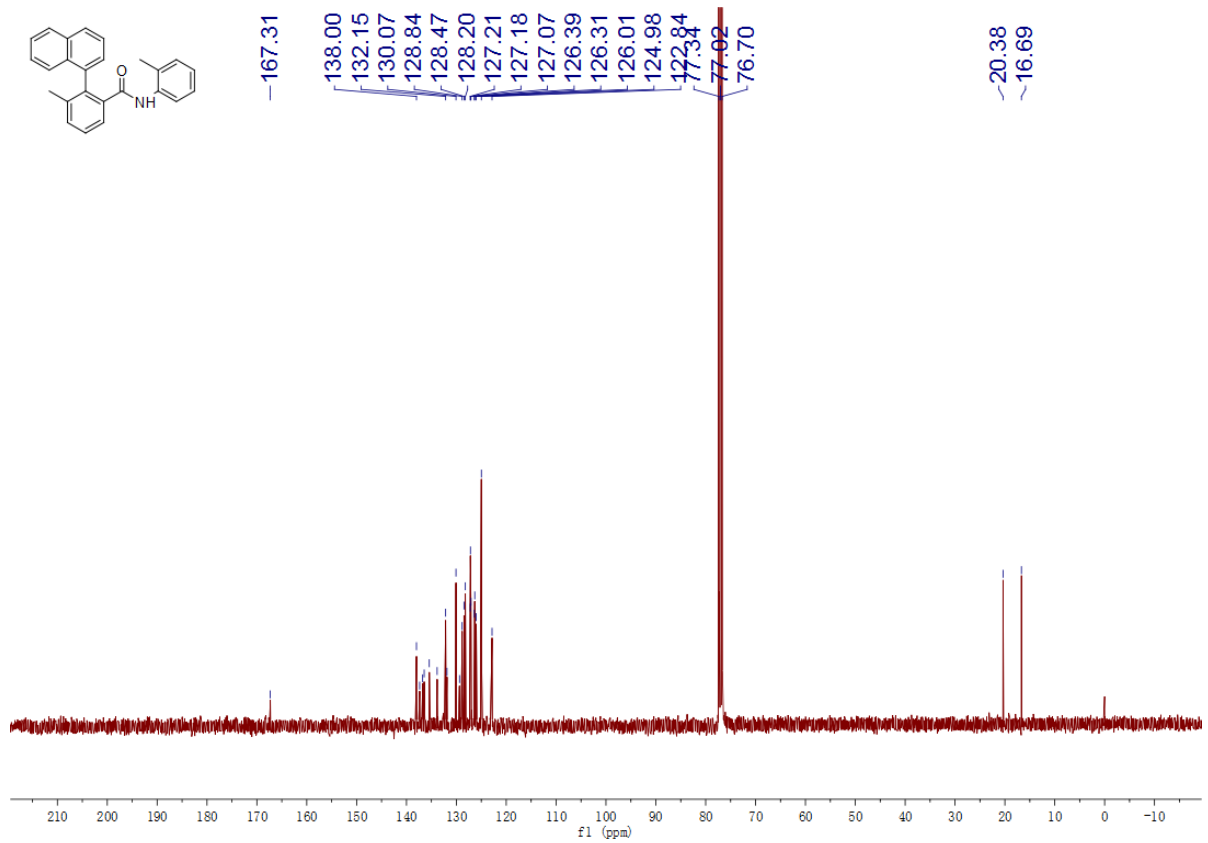

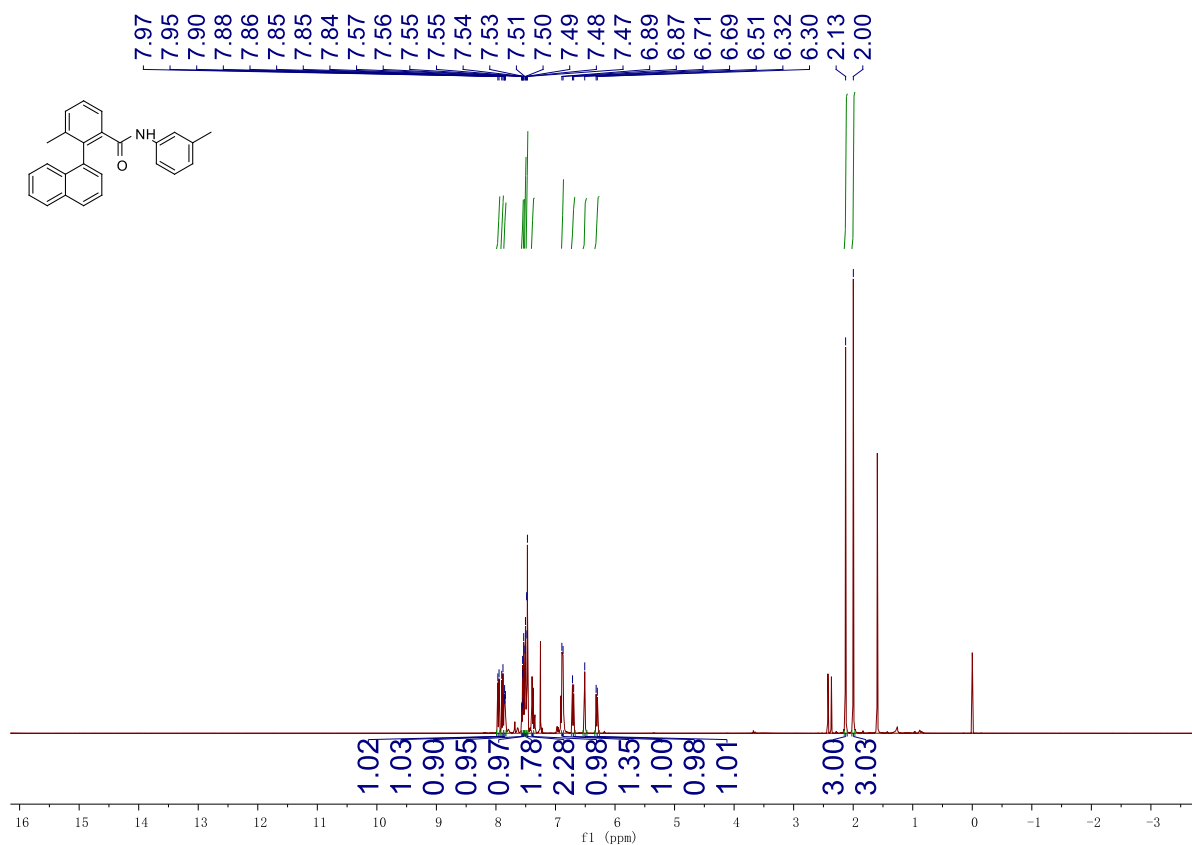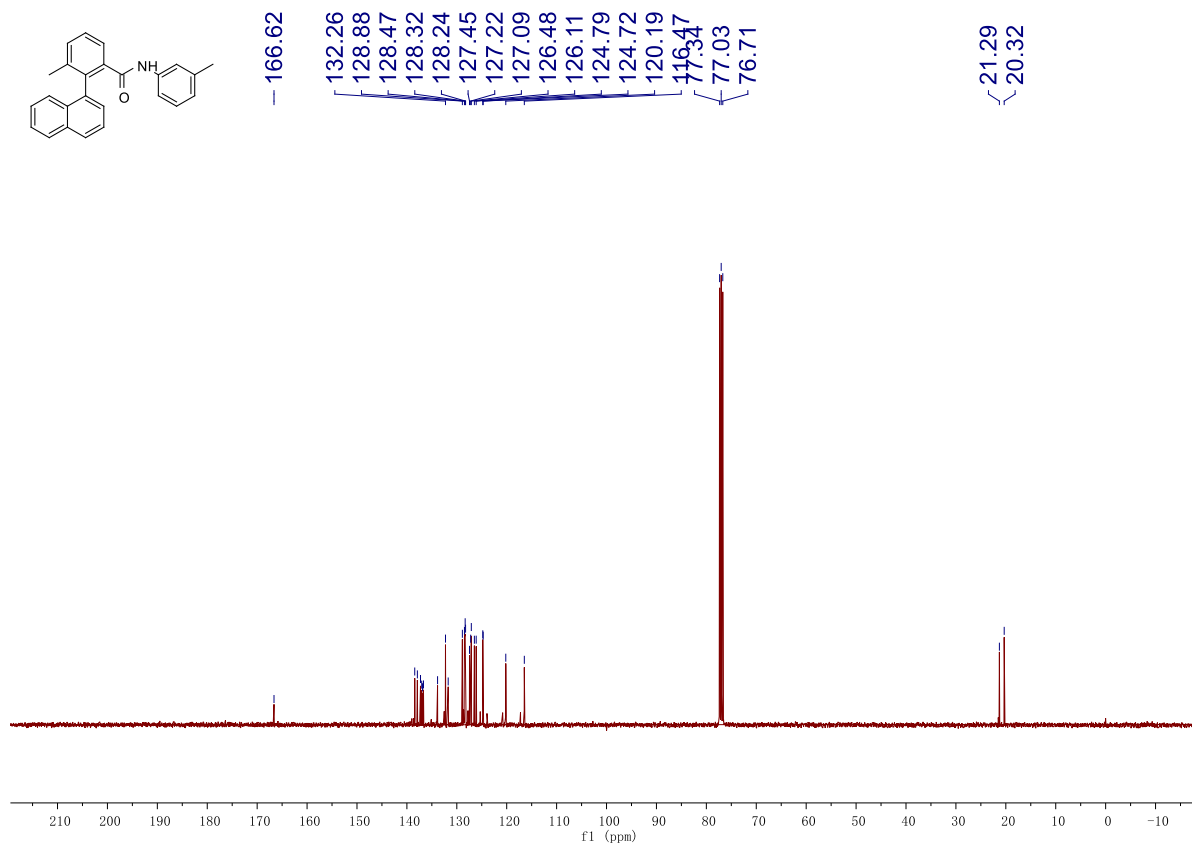

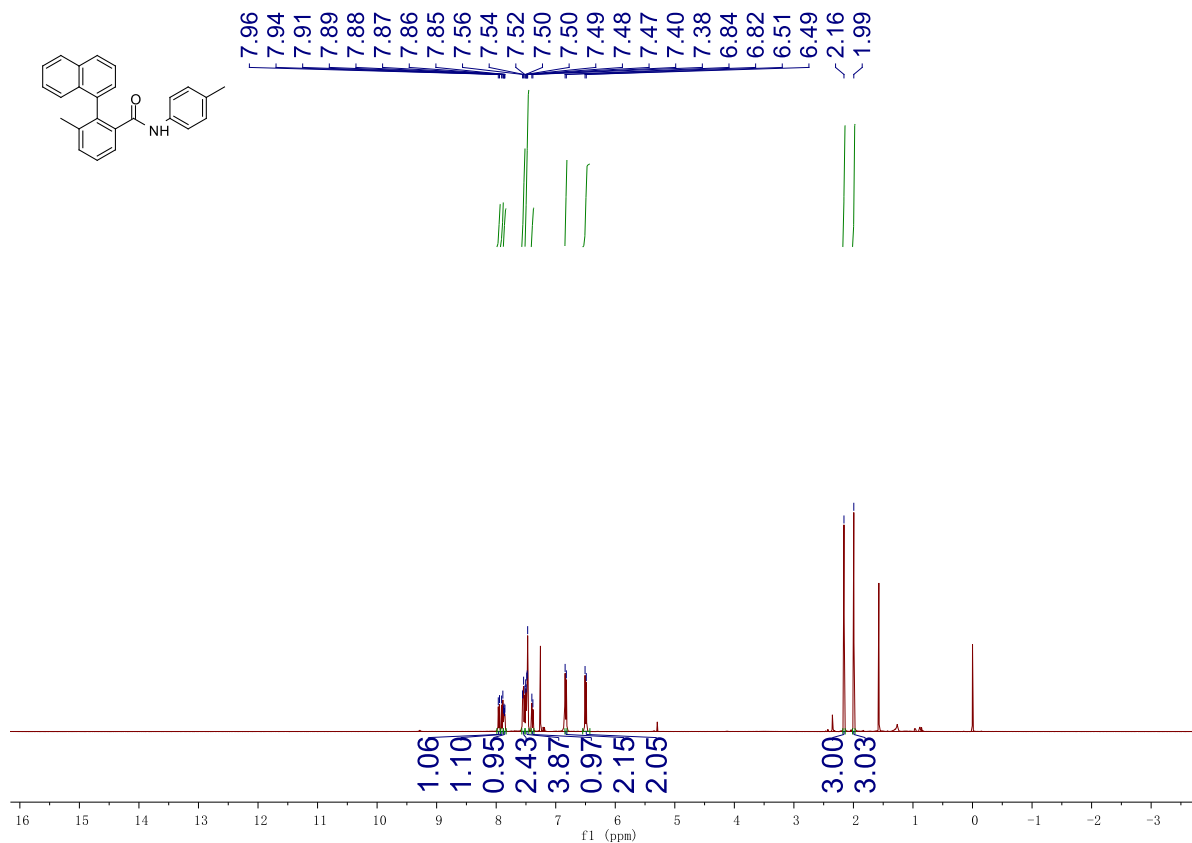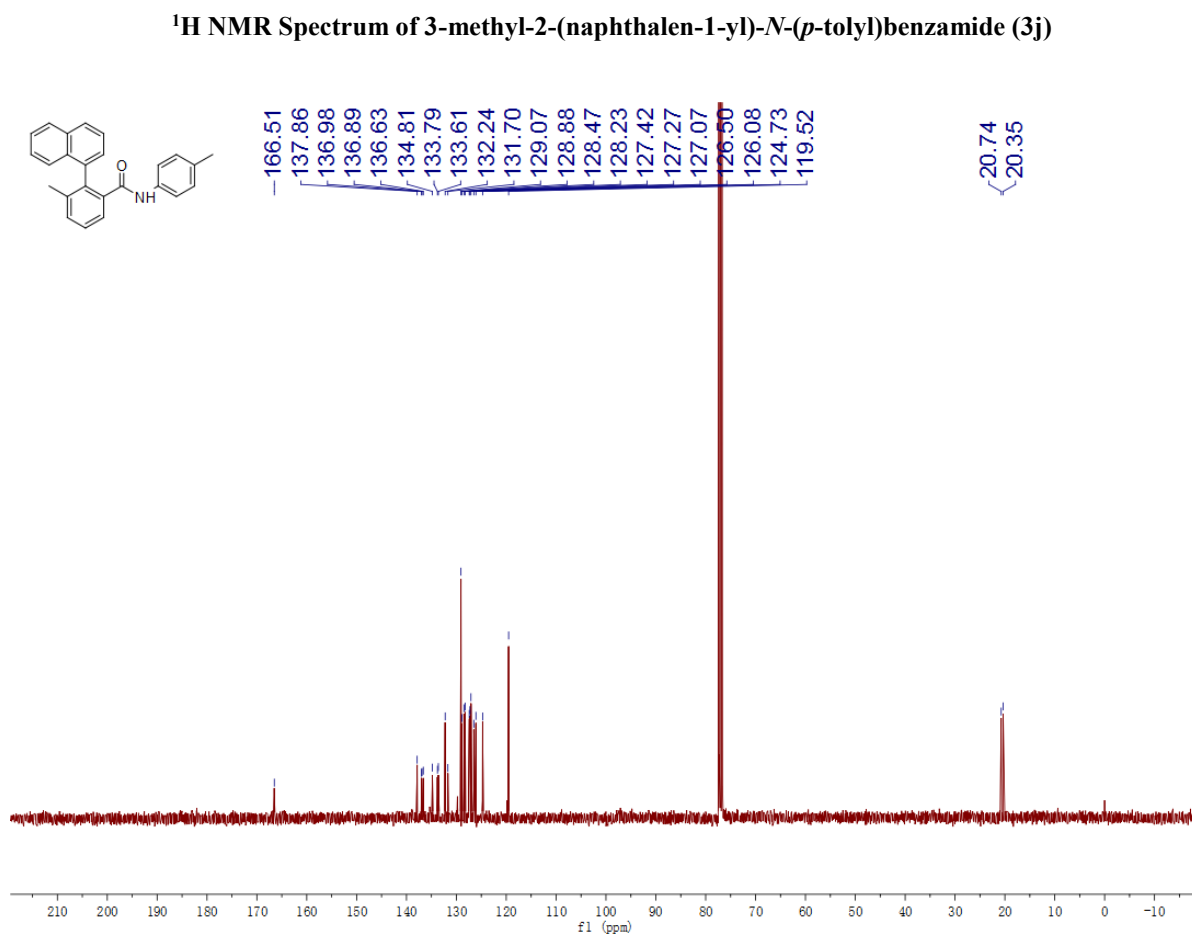



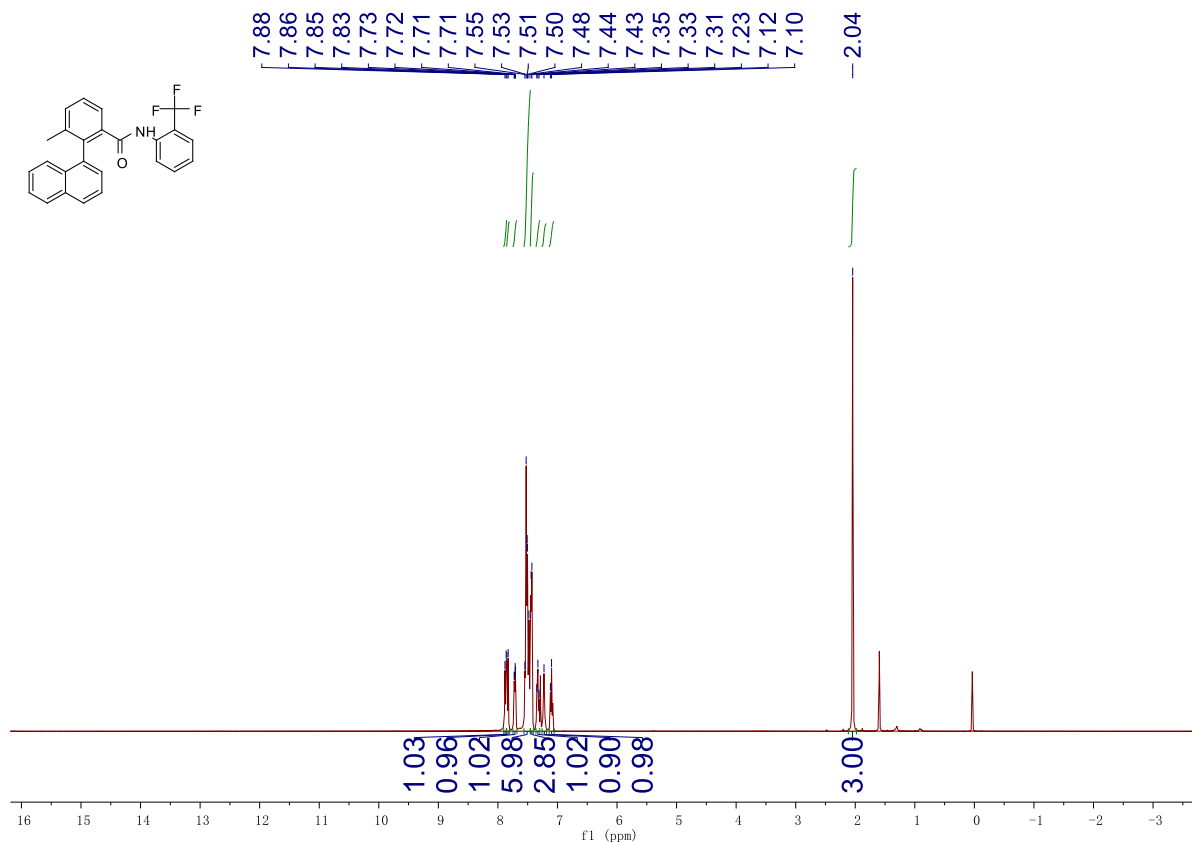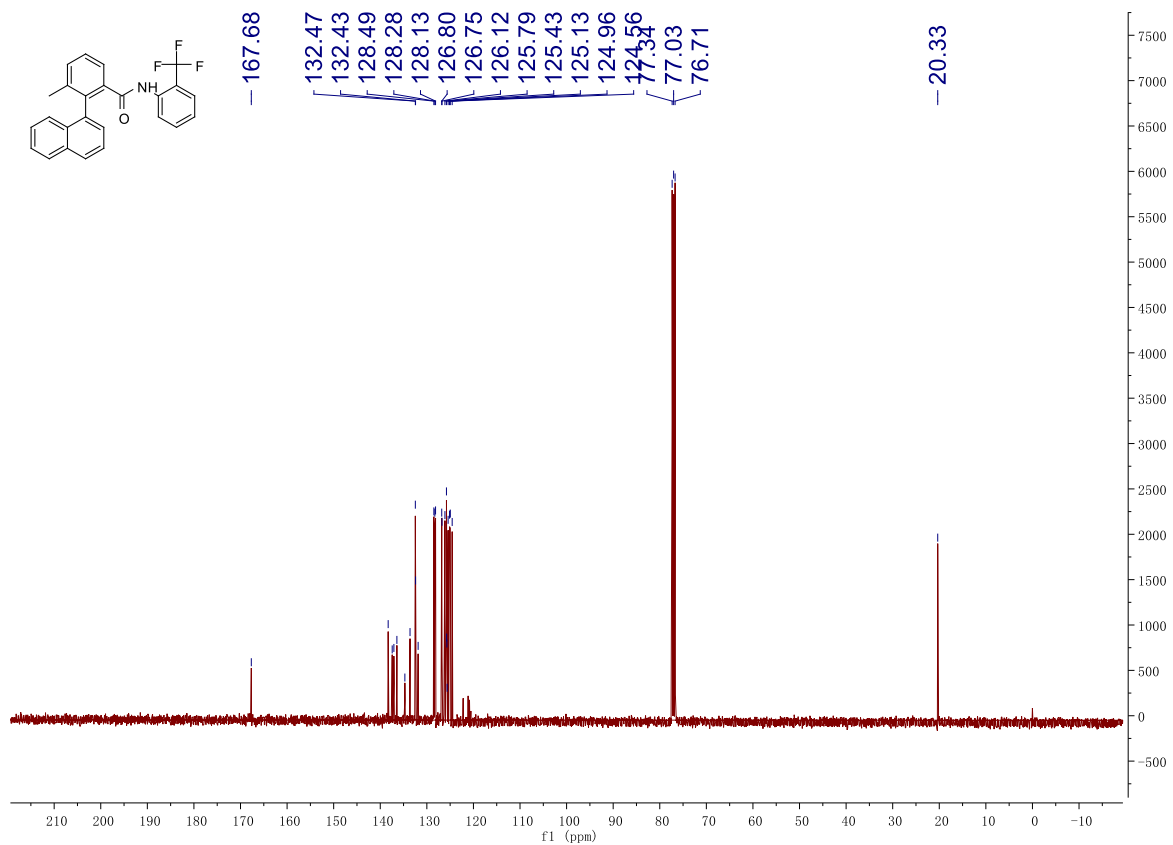

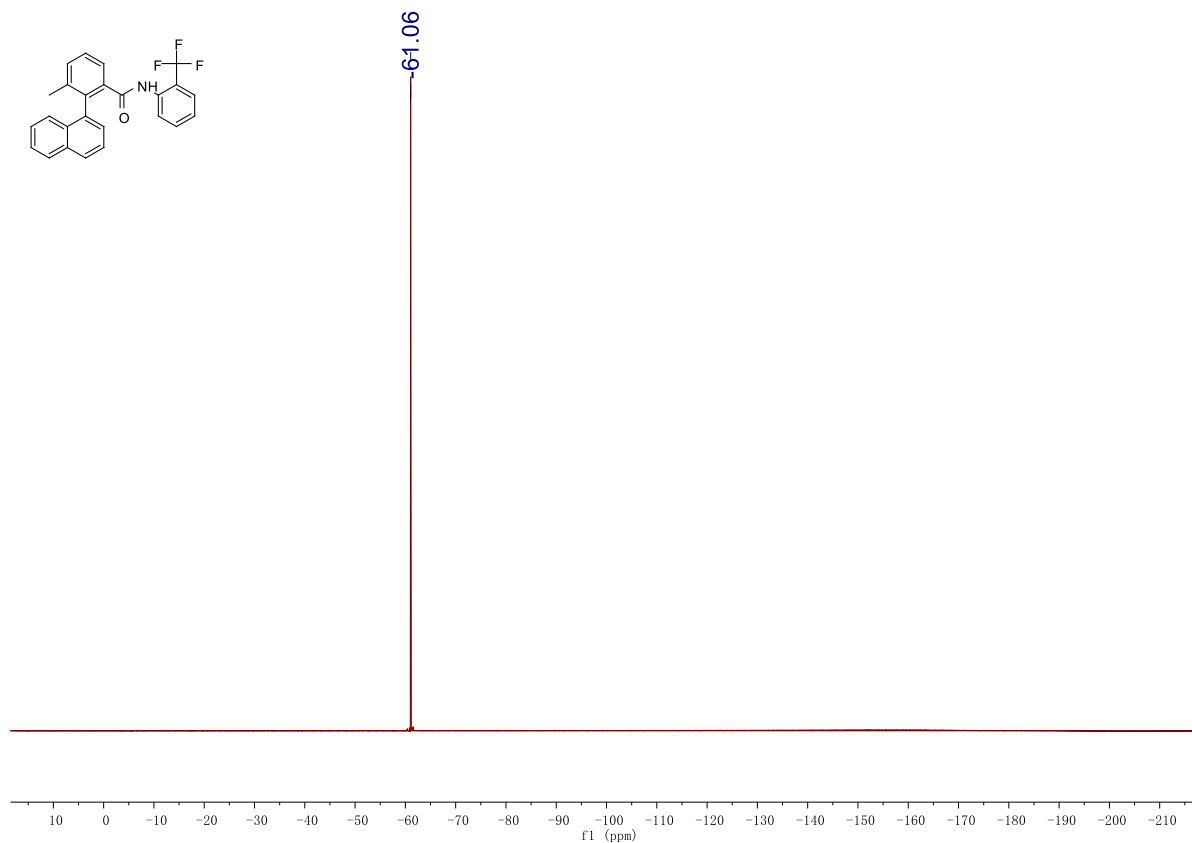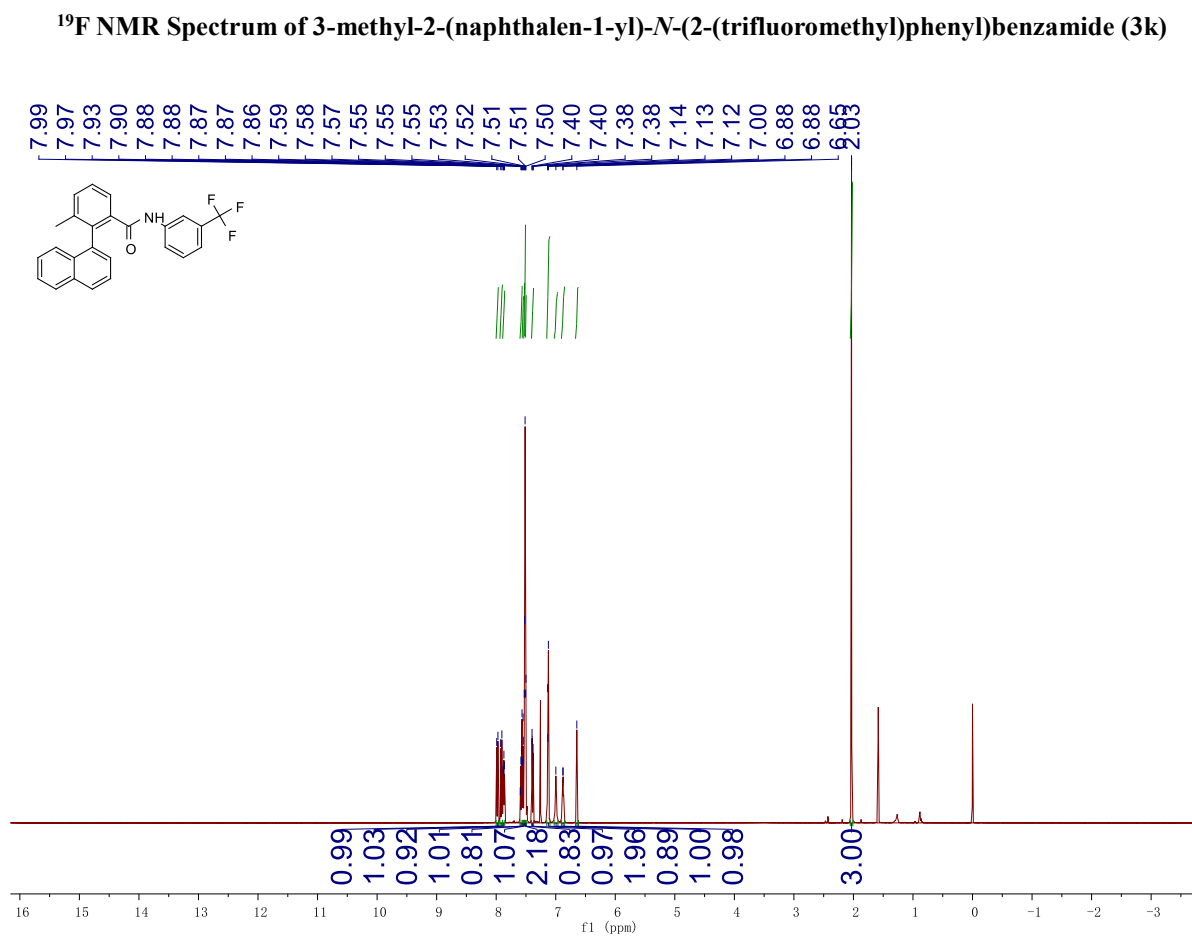

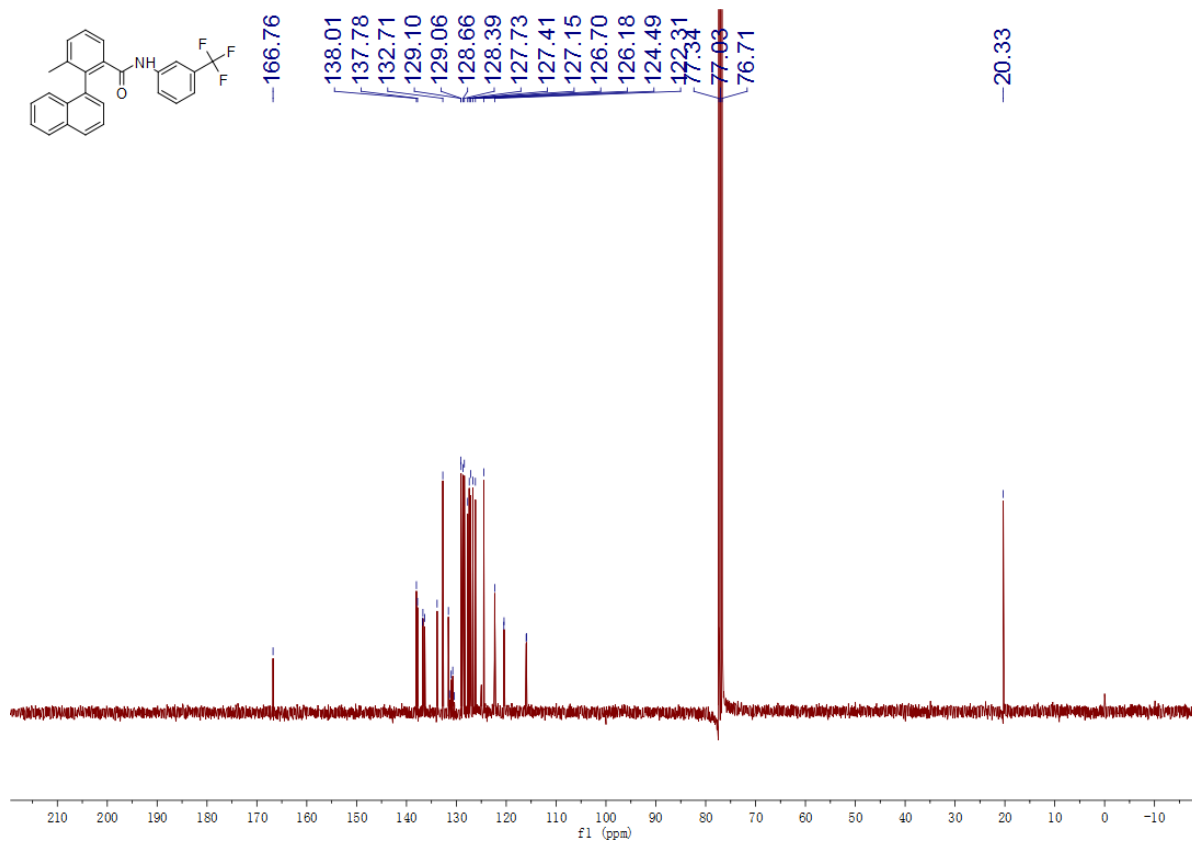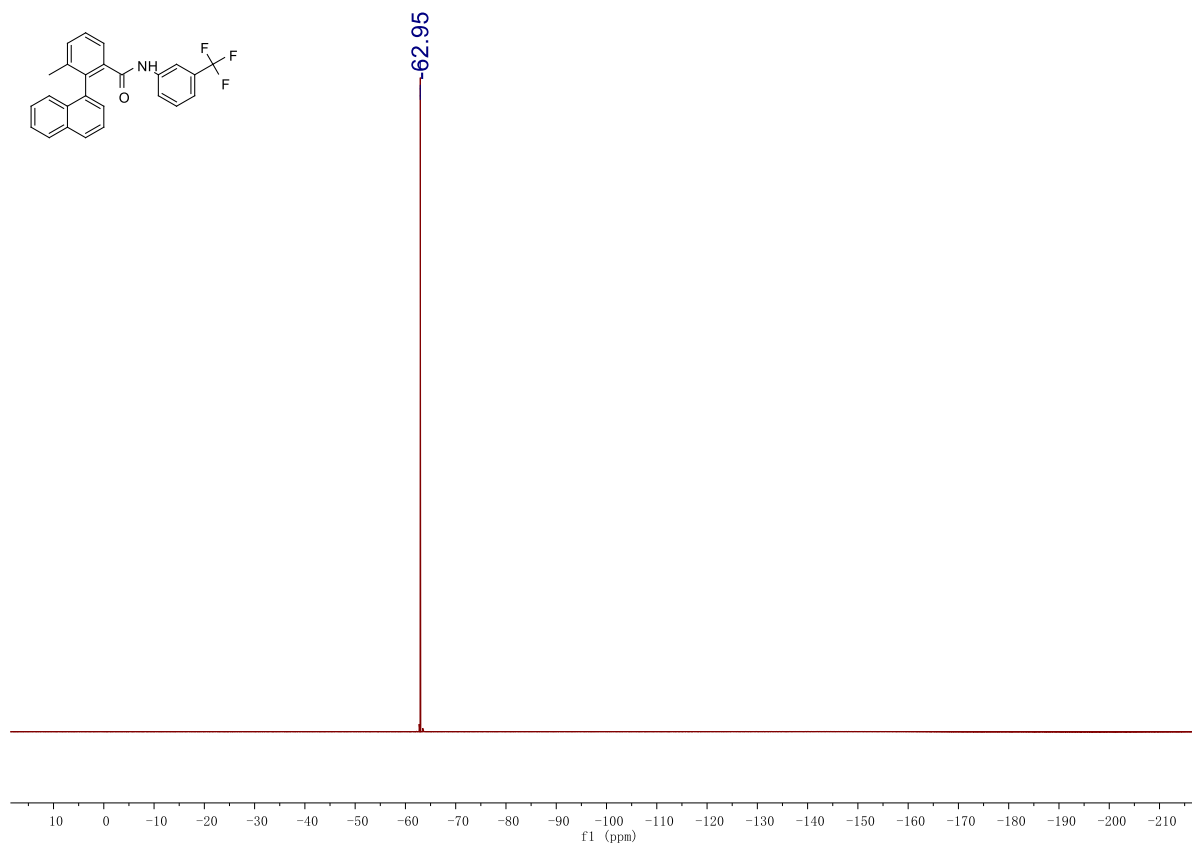

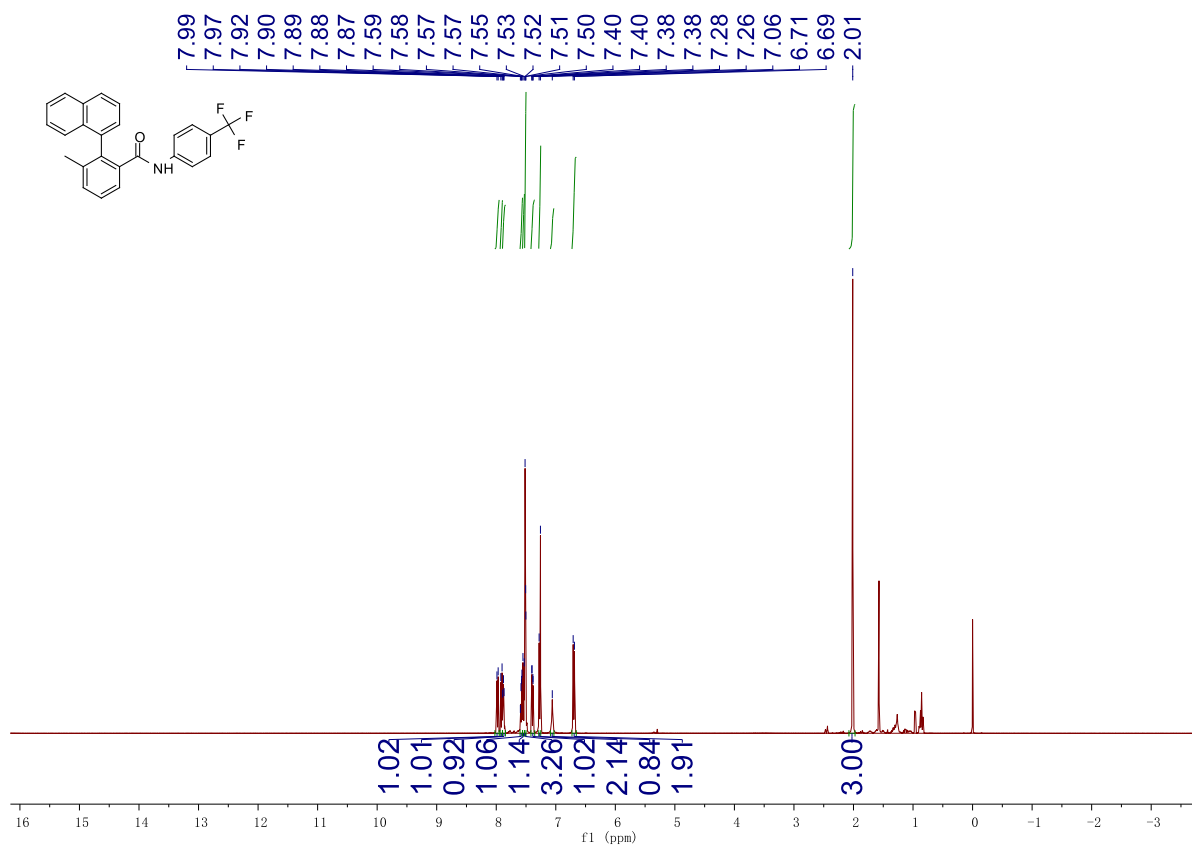

**<sup>1</sup>H NMR Spectrum of 3-methyl-2-(naphthalen-1-yl)-N-(4-(trifluoromethyl)phenyl)benzamide (3m)**

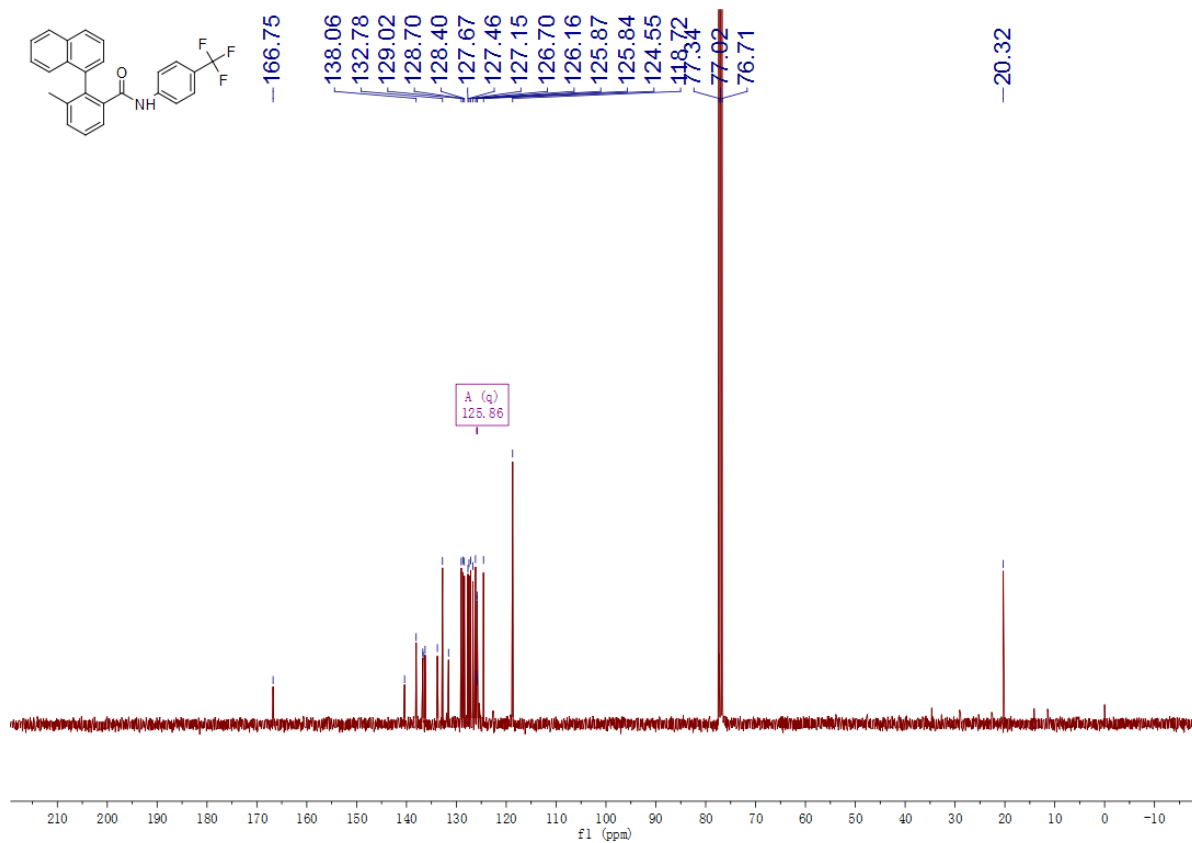

**<sup>13</sup>C NMR Spectrum of 3-methyl-2-(naphthalen-1-yl)-N-(4-(trifluoromethyl)phenyl)benzamide (3m)**

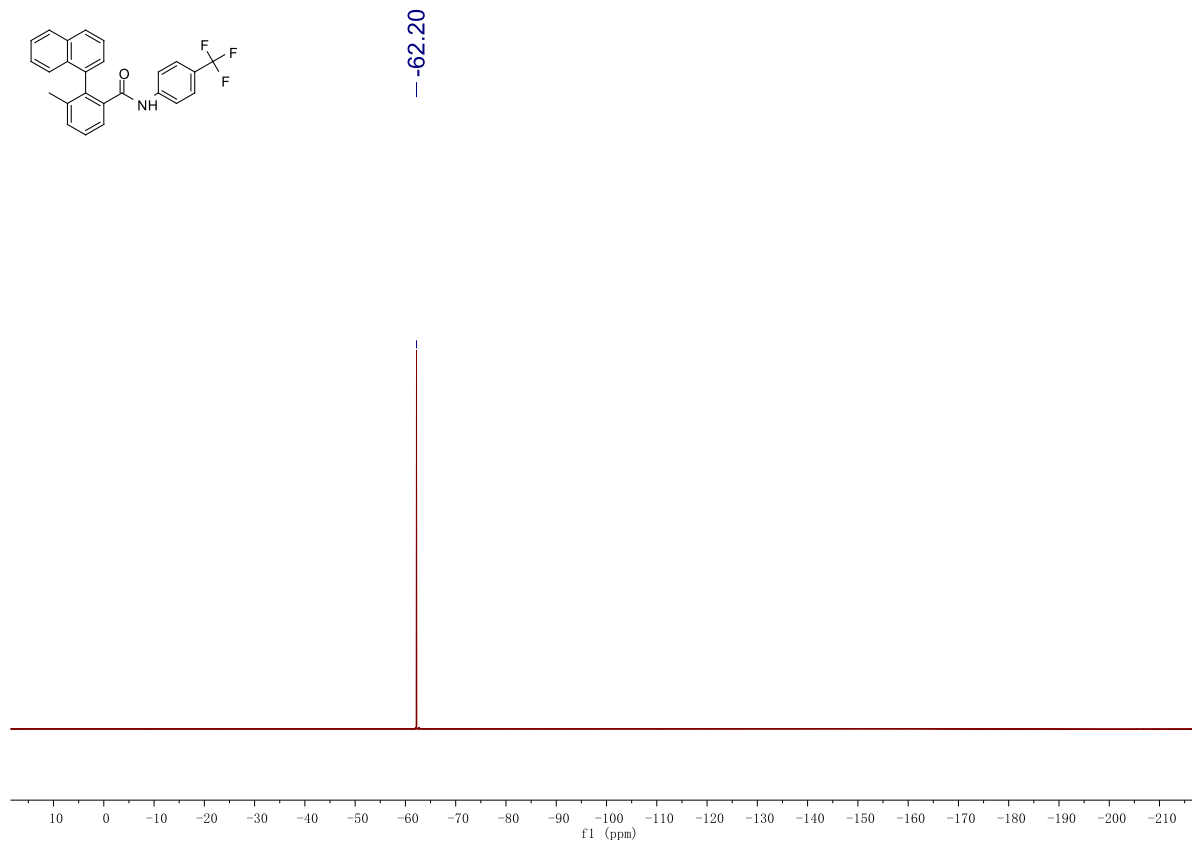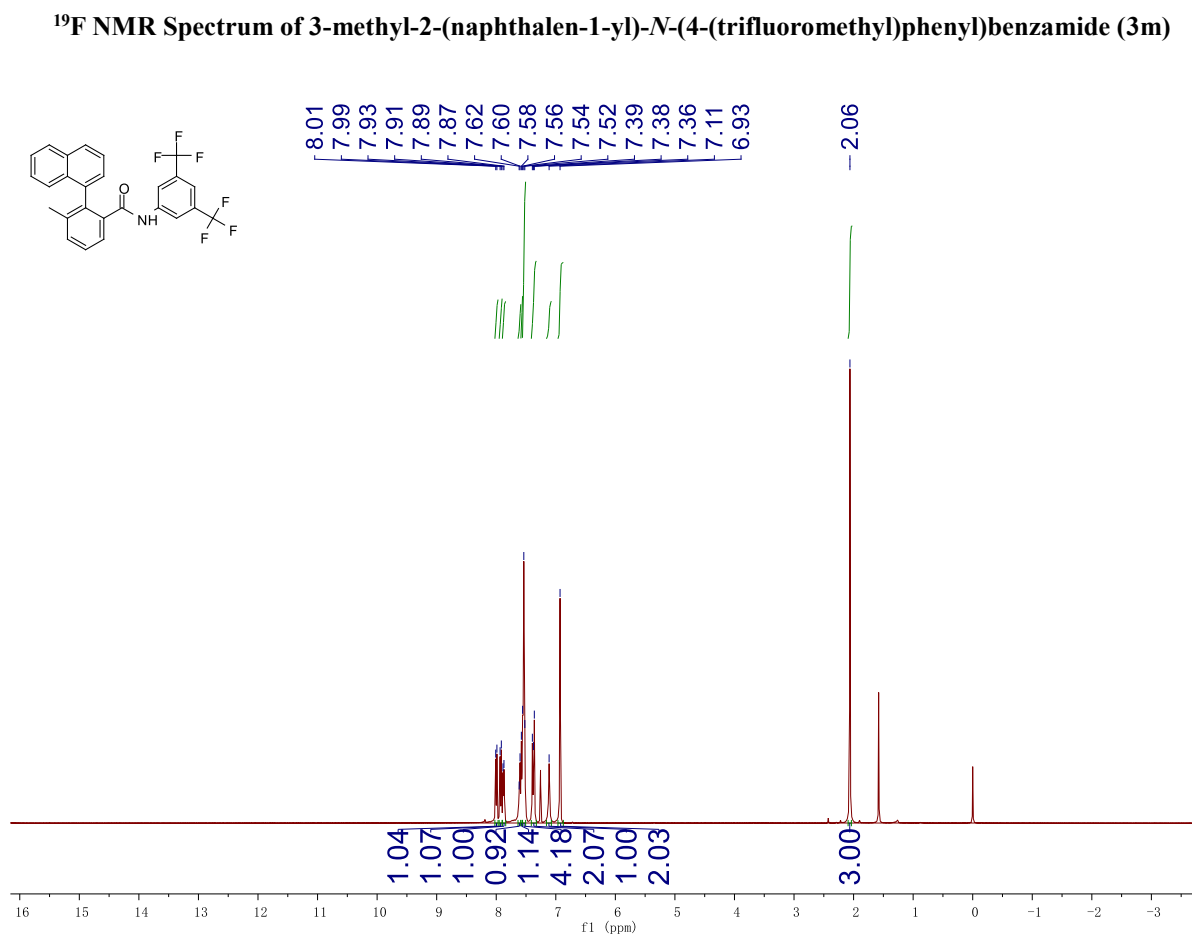

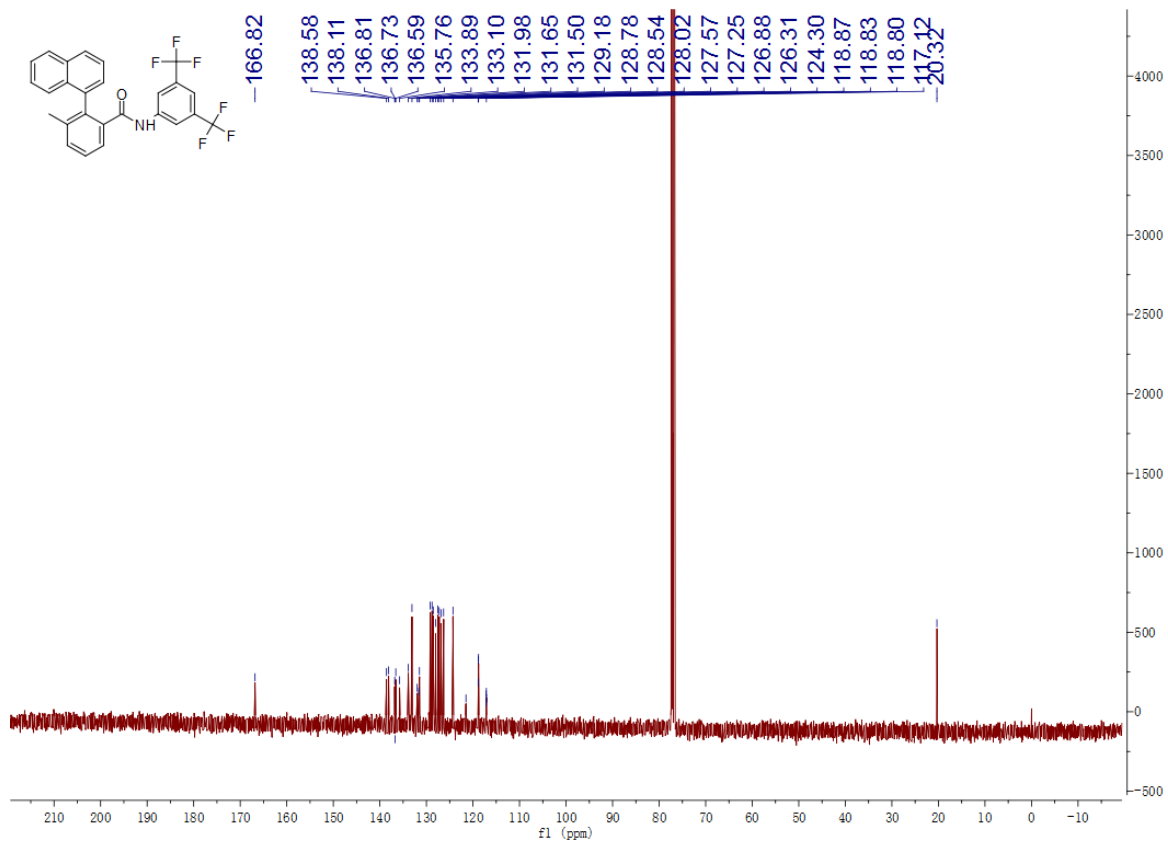

**<sup>13</sup>C NMR Spectrum of *N*-(3,5-bis(trifluoromethyl)phenyl)-3-methyl-2-(naphthalen-1-yl)benzamide (3n)**

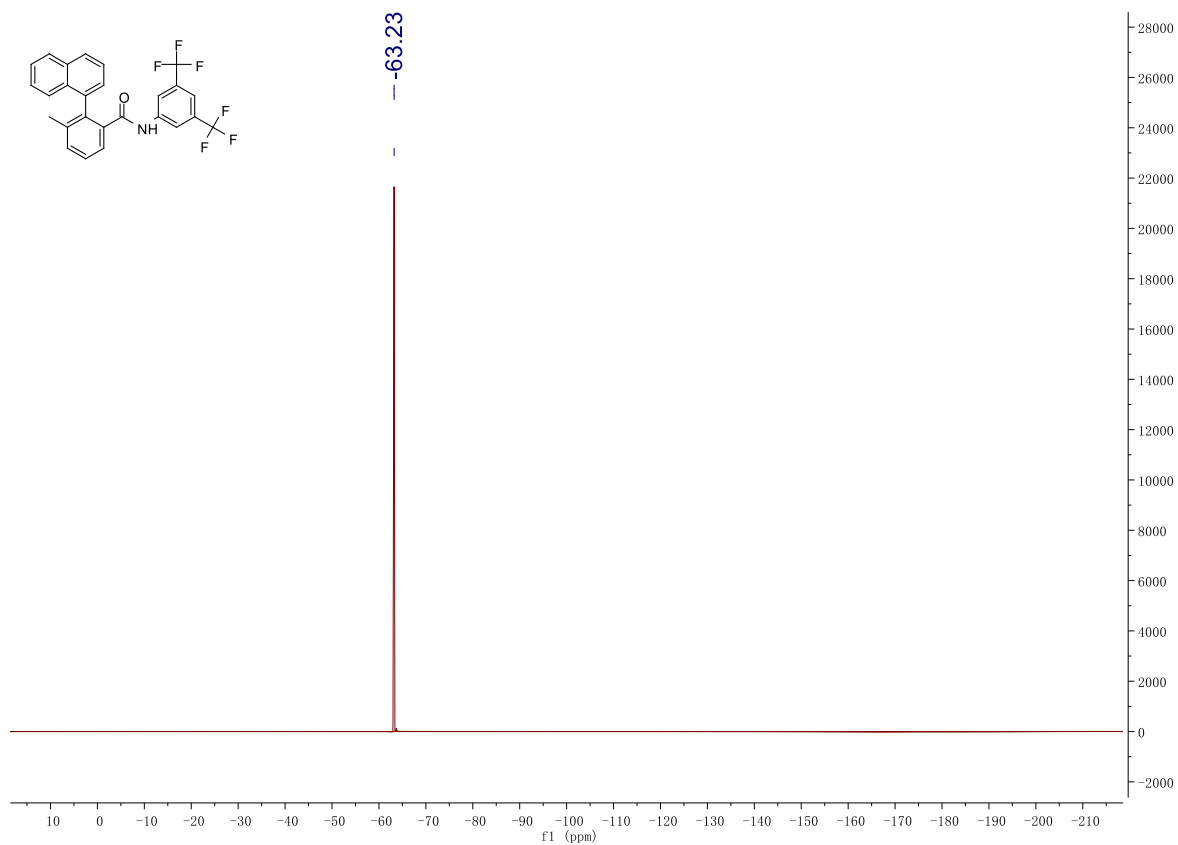

**<sup>19</sup>F NMR Spectrum of *N*-(3,5-bis(trifluoromethyl)phenyl)-3-methyl-2-(naphthalen-1-yl)benzamide (3n)**

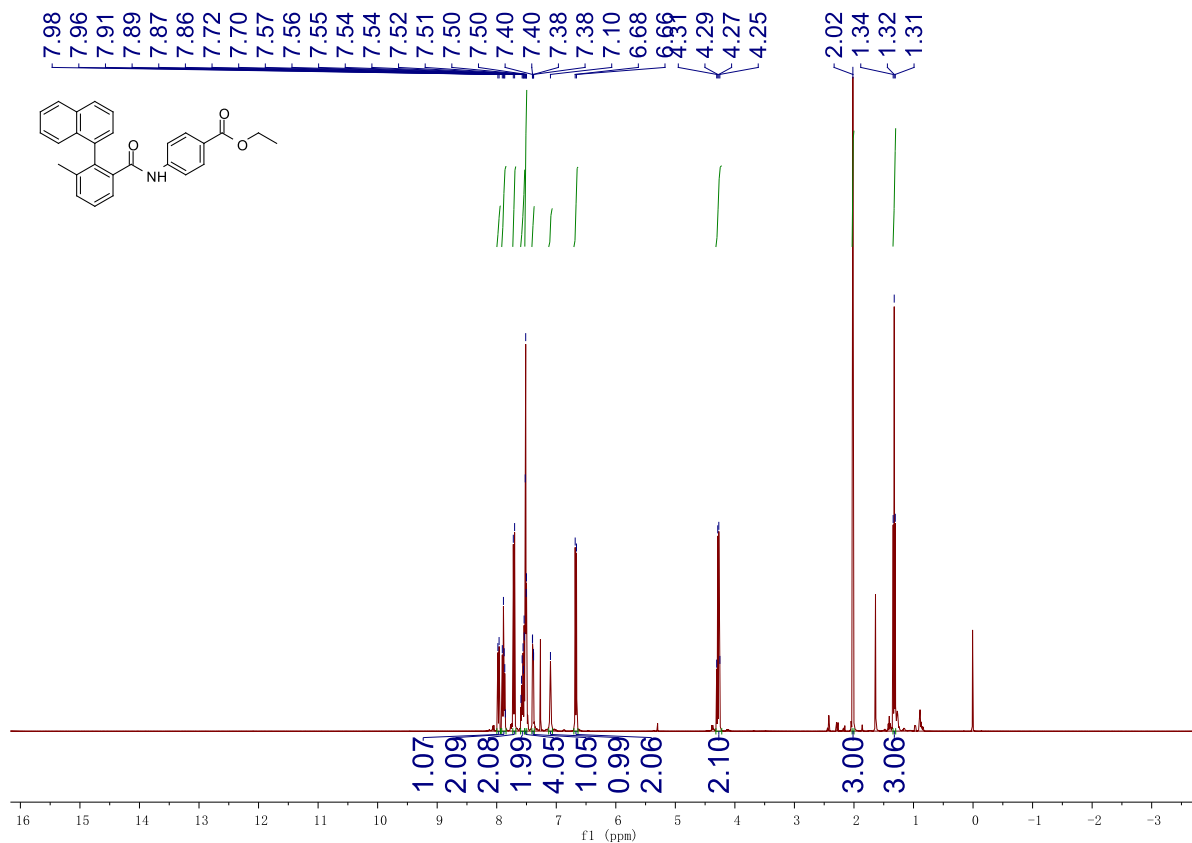

**<sup>1</sup>H NMR Spectrum of ethyl 4-(3-methyl-2-(naphthalen-1-yl)benzamido)benzoate (30)**

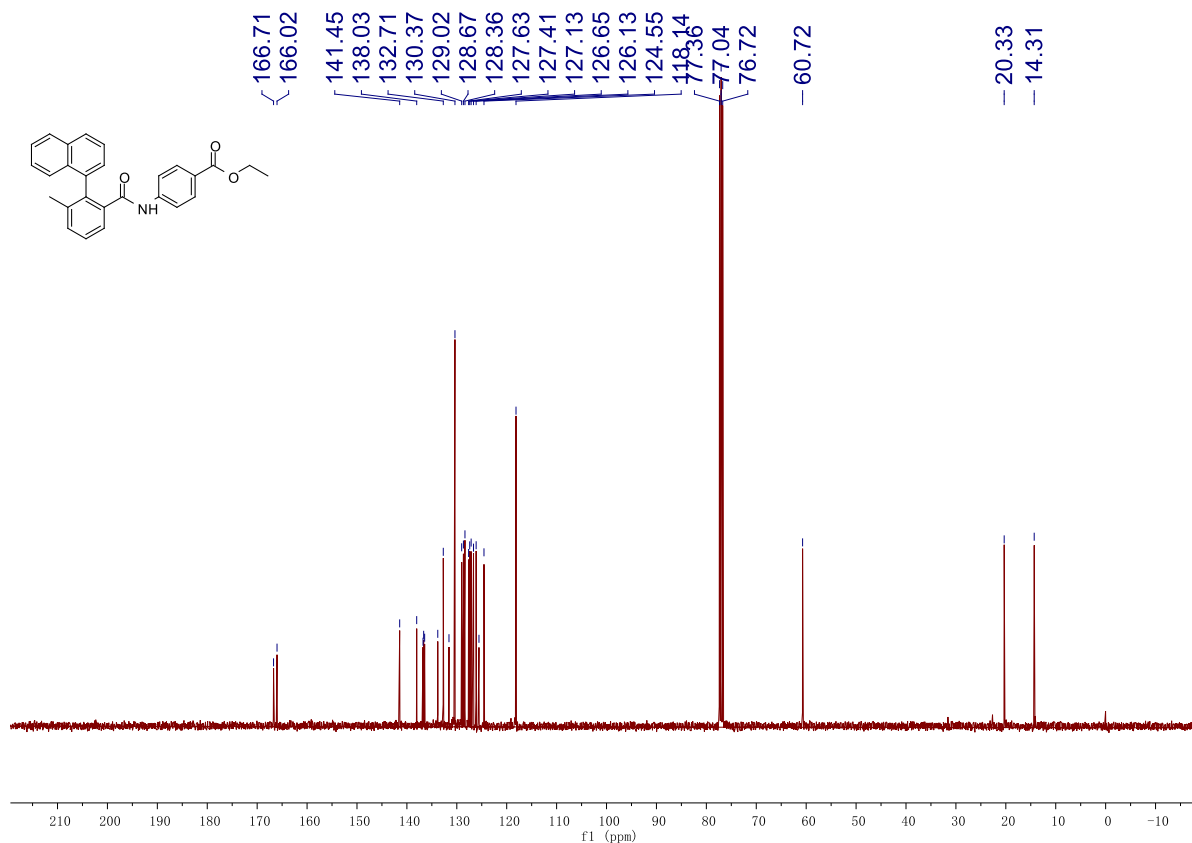

**<sup>13</sup>C NMR Spectrum of ethyl 4-(3-methyl-2-(naphthalen-1-yl)benzamido)benzoate (30)**

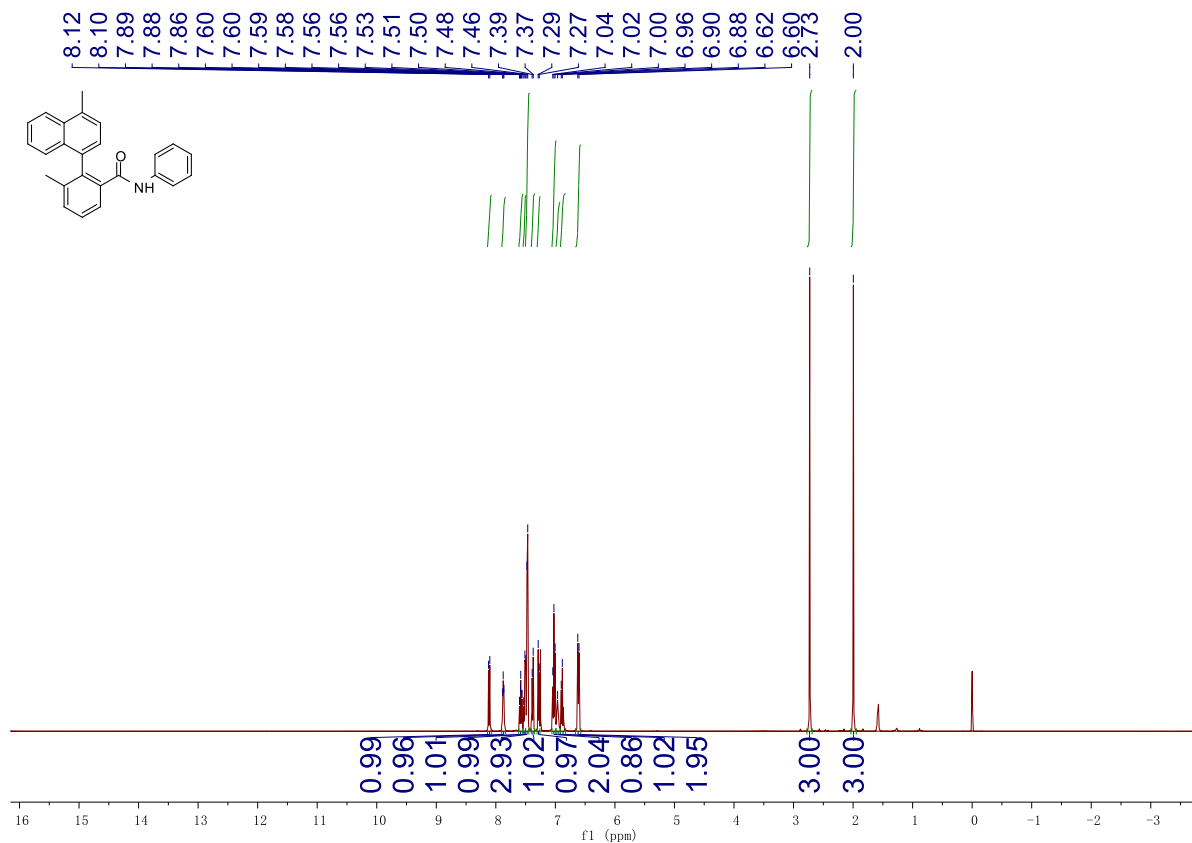

**<sup>1</sup>H NMR Spectrum of 3-methyl-2-(4-methylnaphthalen-1-yl)-N-phenylbenzamide (3p)**

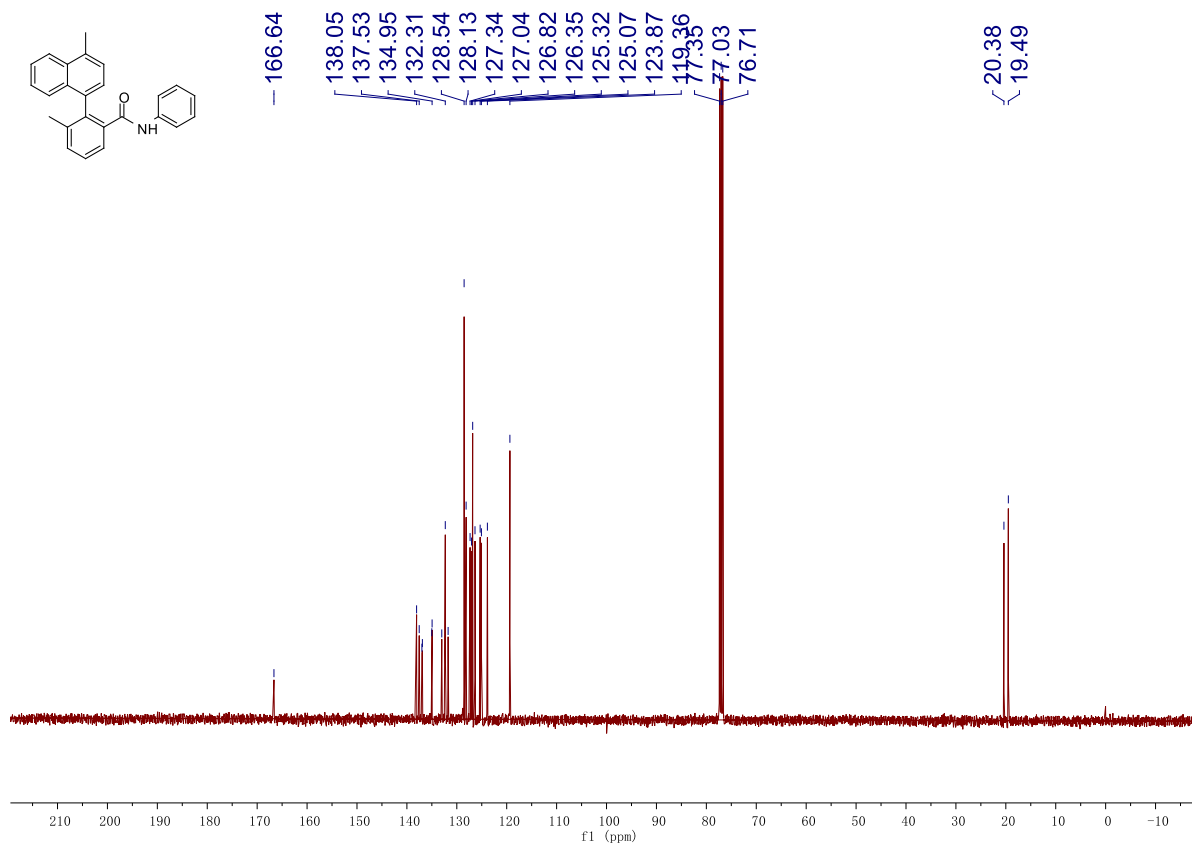

**<sup>13</sup>C NMR Spectrum of 3-methyl-2-(4-methylnaphthalen-1-yl)-N-phenylbenzamide (3p)**



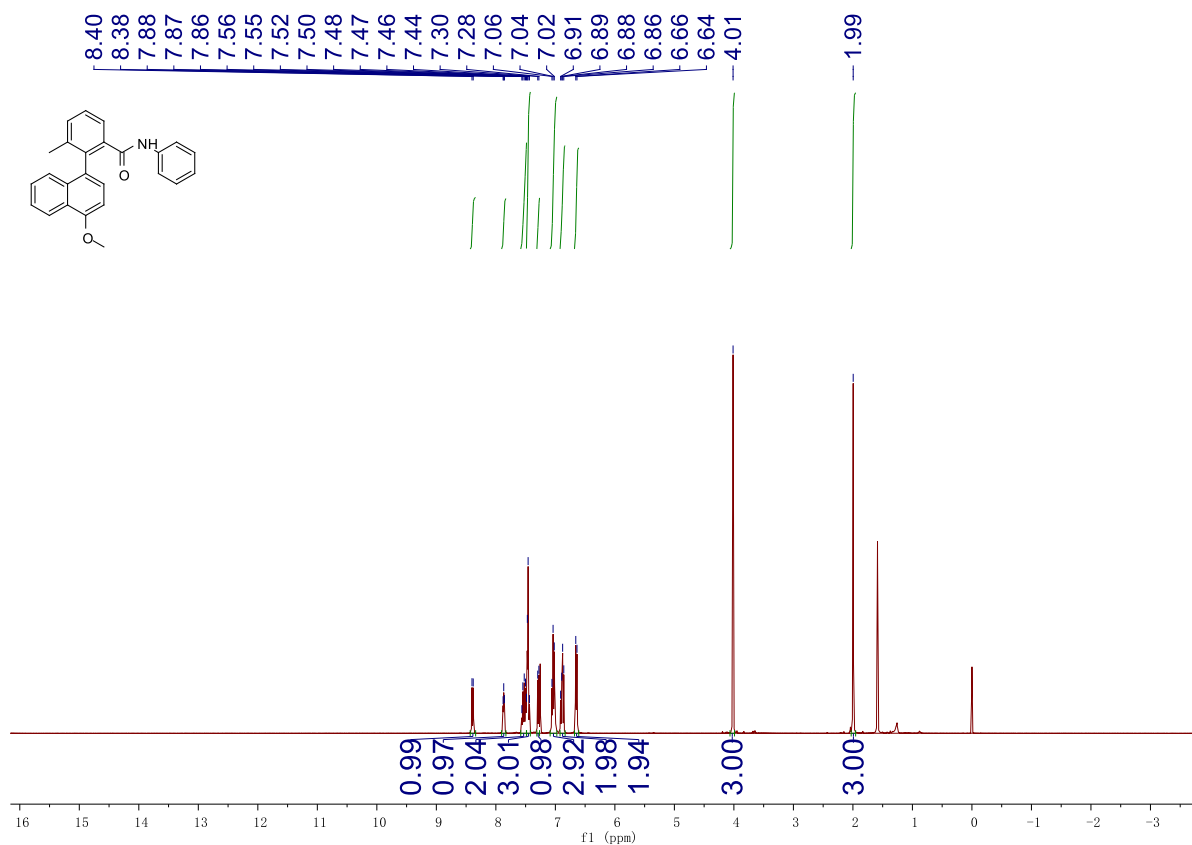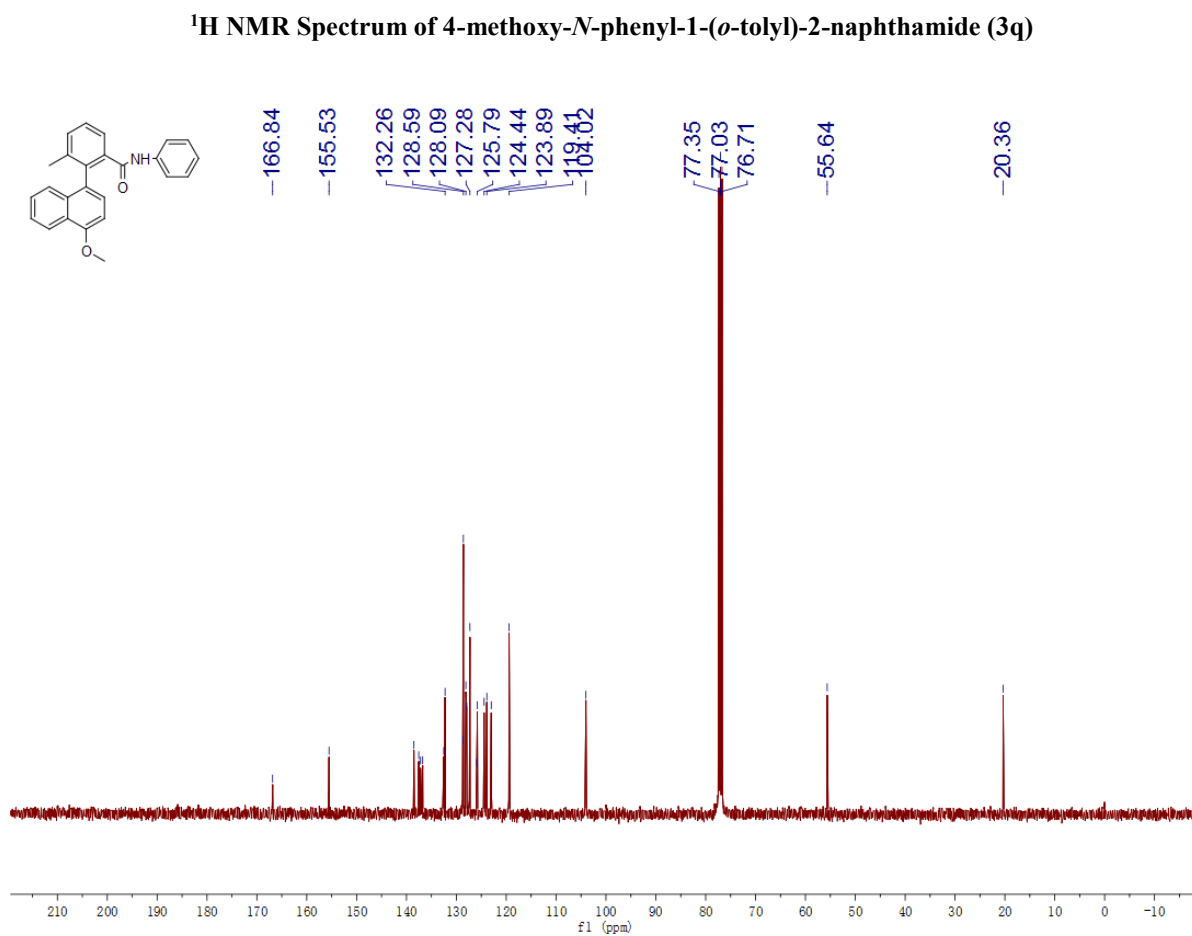

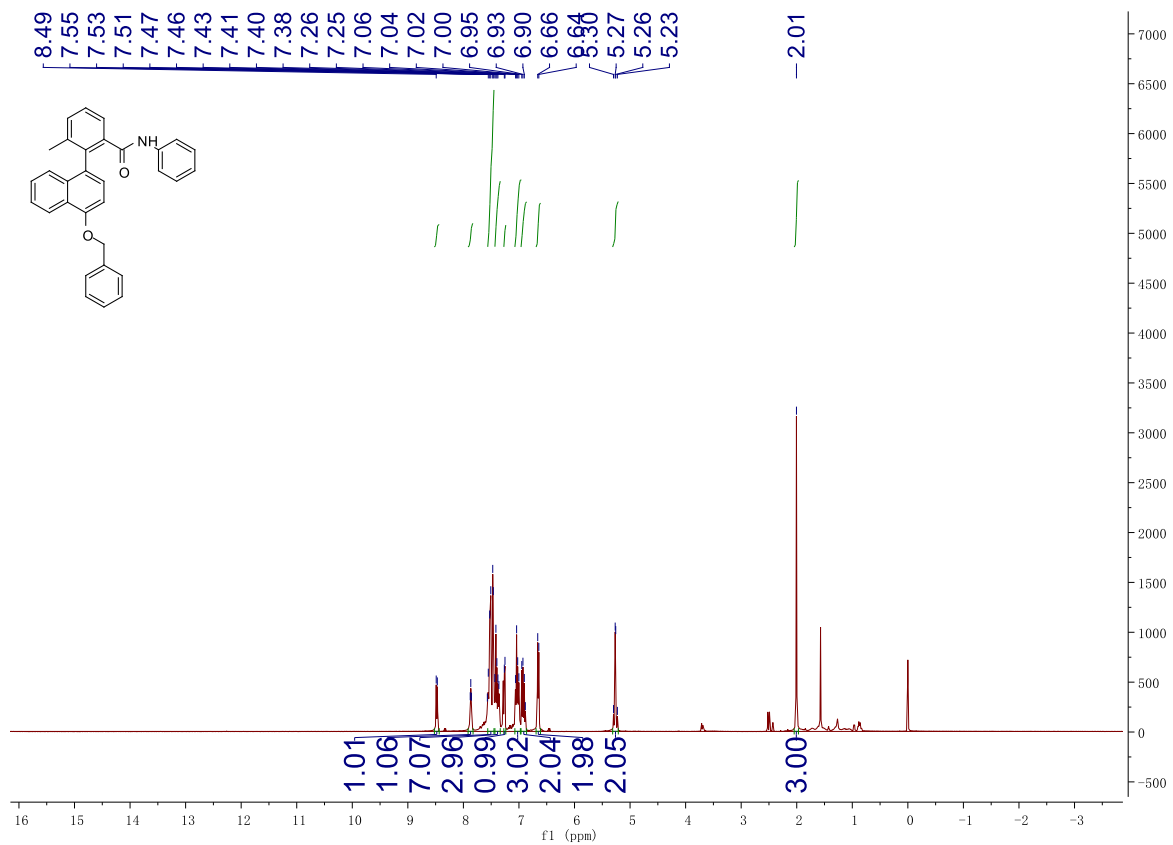

**<sup>1</sup>H NMR Spectrum of 2-(4-(benzyloxy)naphthalen-1-yl)-3-methyl-N-phenylbenzamide (3r)**

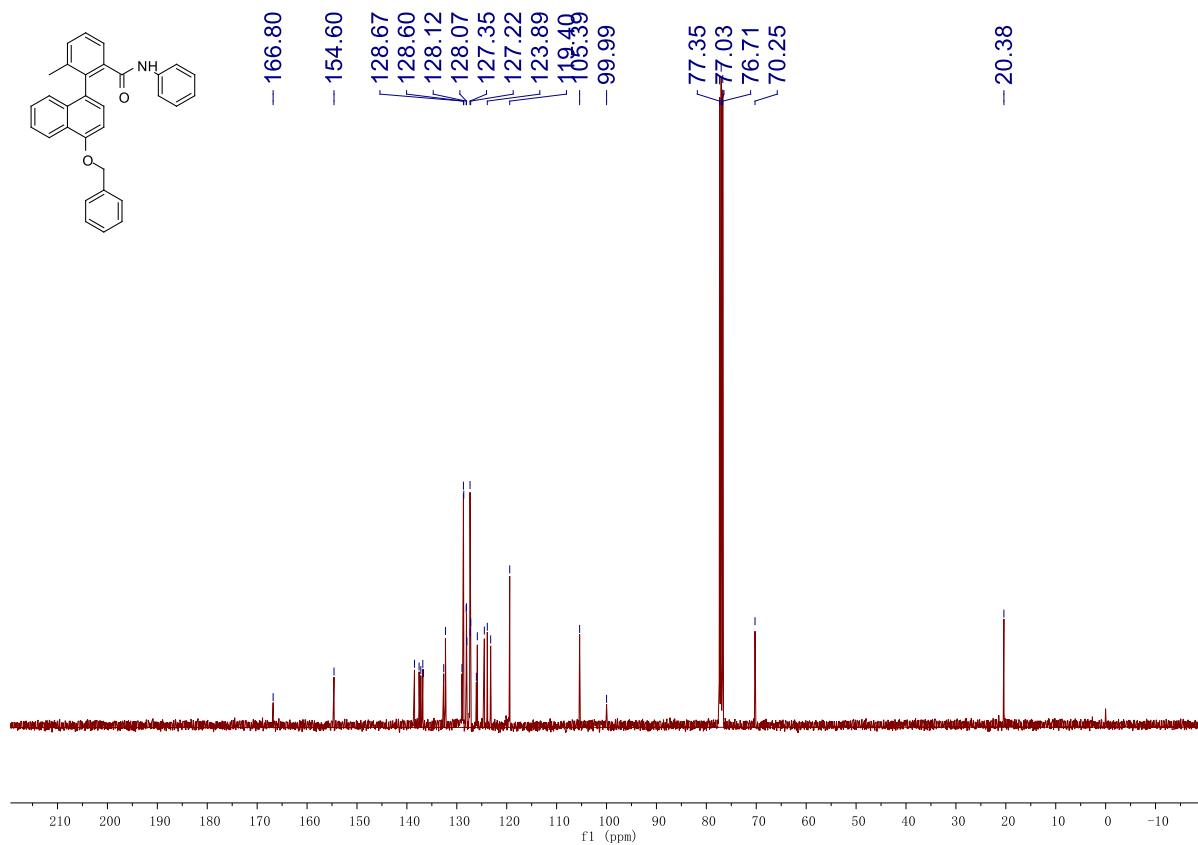

**<sup>13</sup>C NMR Spectrum of 2-(4-(benzyloxy)naphthalen-1-yl)-3-methyl-N-phenylbenzamide (3r)**

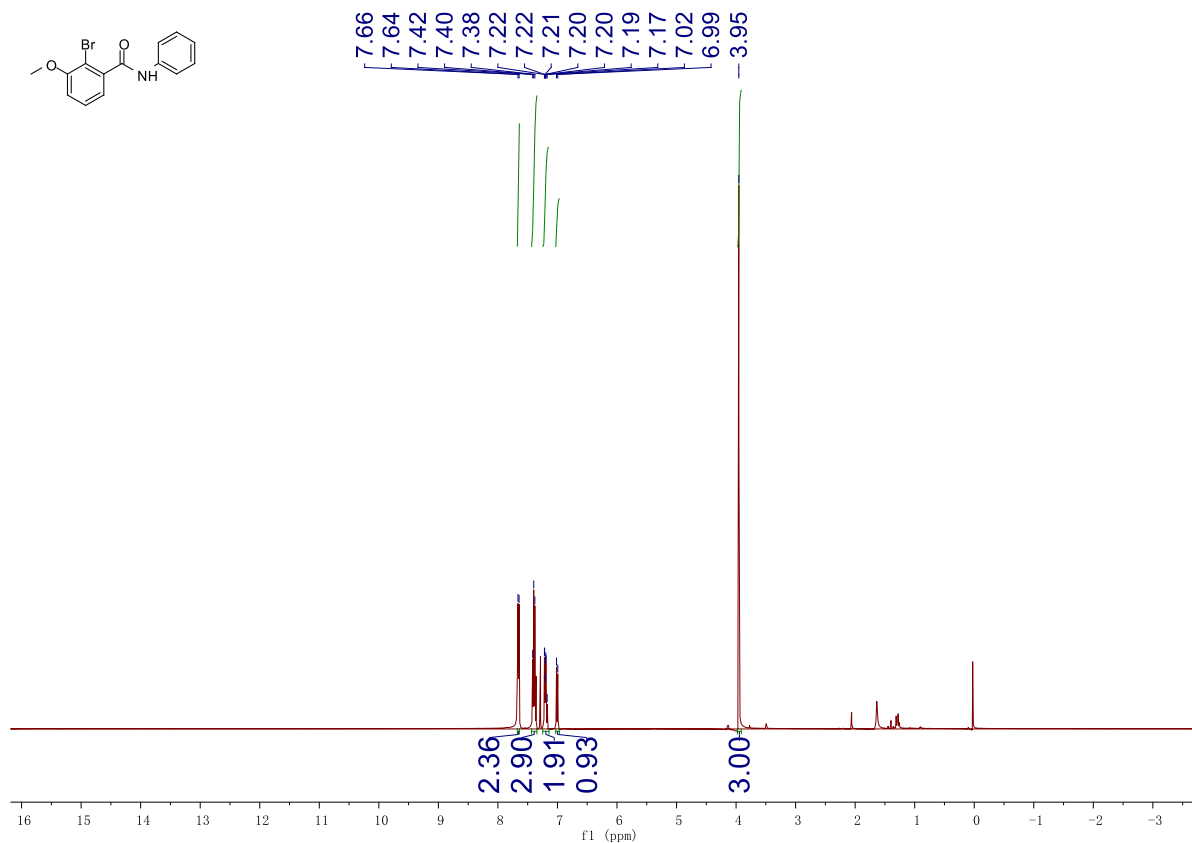

**<sup>1</sup>H NMR Spectrum of 2-bromo-3-methoxy-N-phenylbenzamide (4i)**

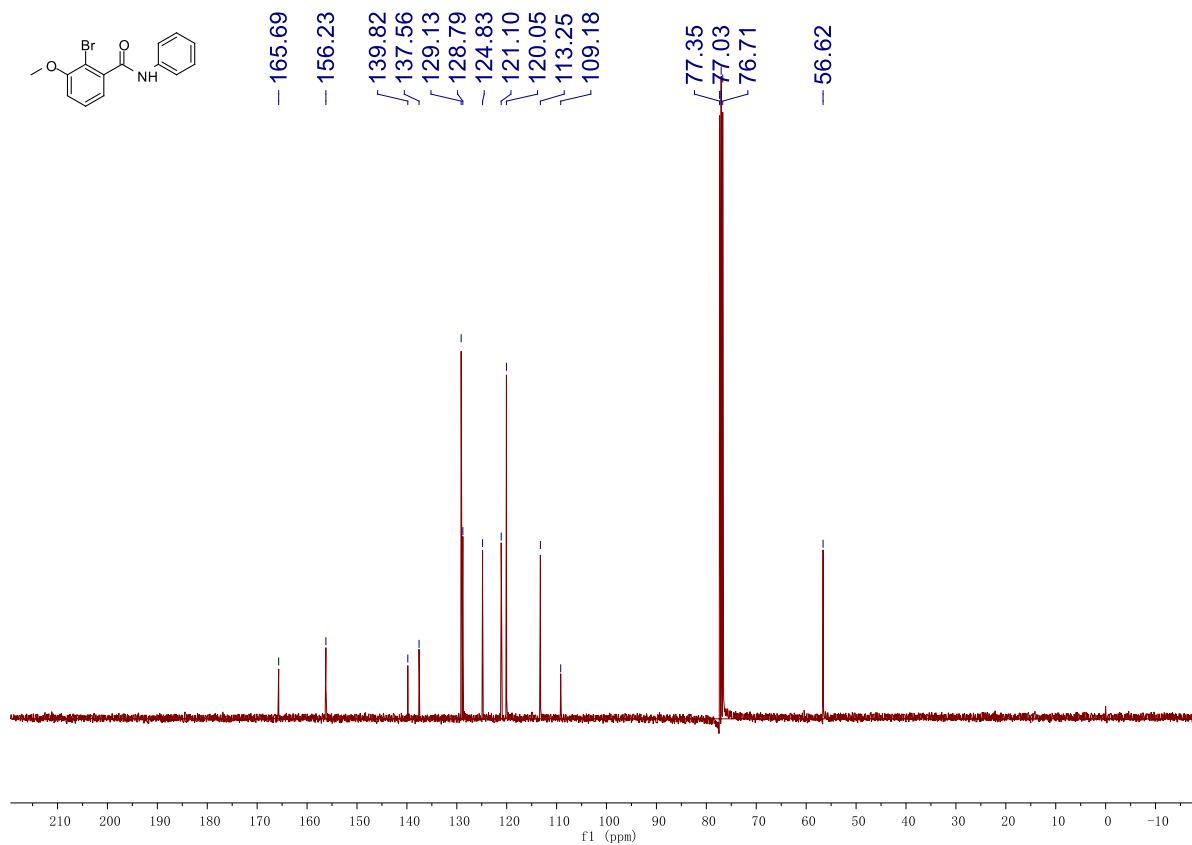

**<sup>13</sup>C NMR Spectrum of 2-bromo-3-methoxy-N-phenylbenzamide (4i)**

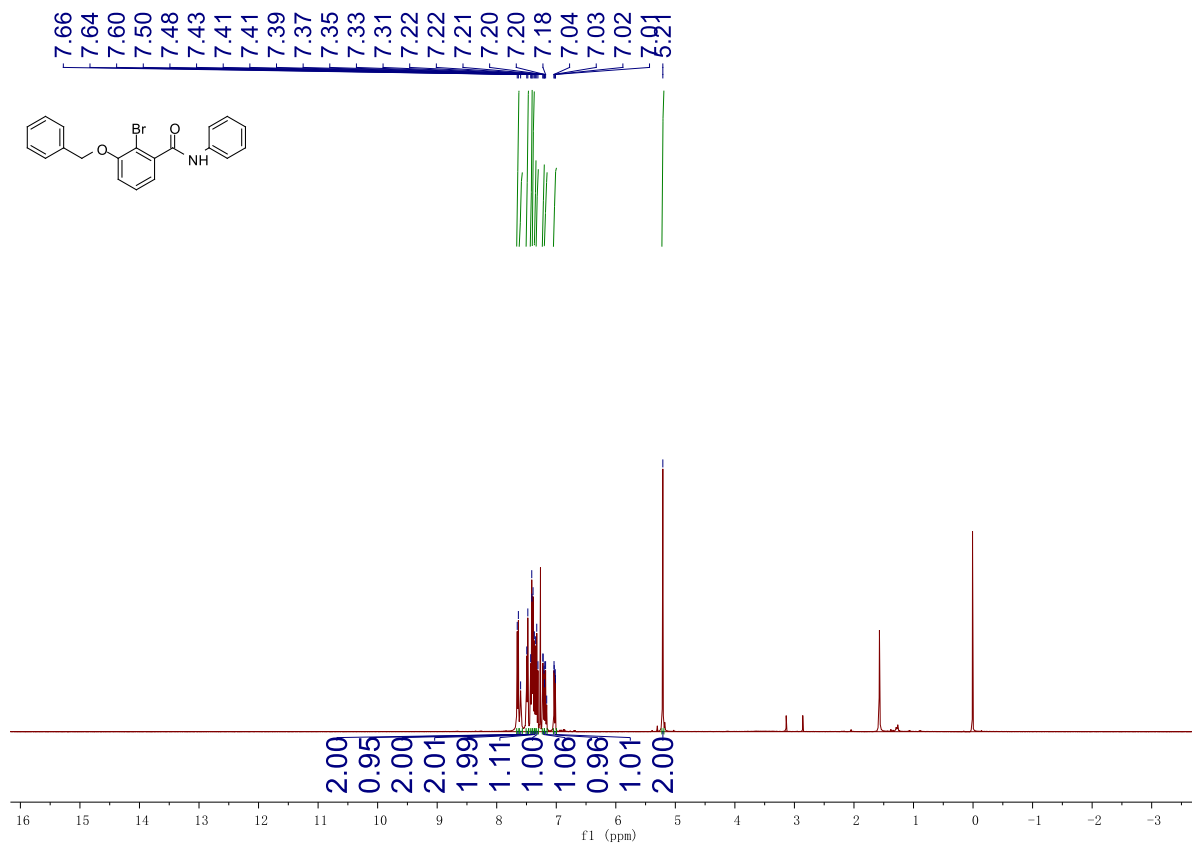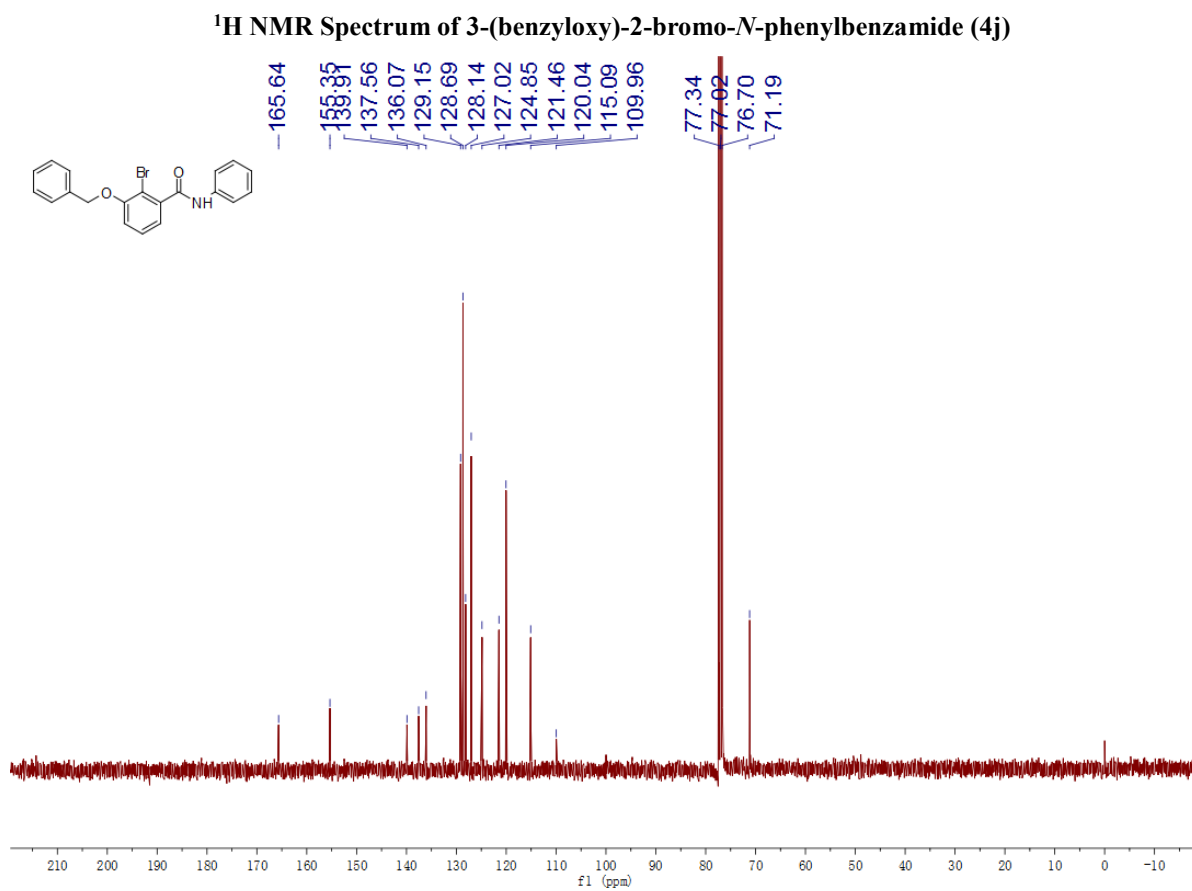

**<sup>13</sup>C NMR Spectrum of 3-(benzyloxy)-2-bromo-N-phenylbenzamide (4j)**

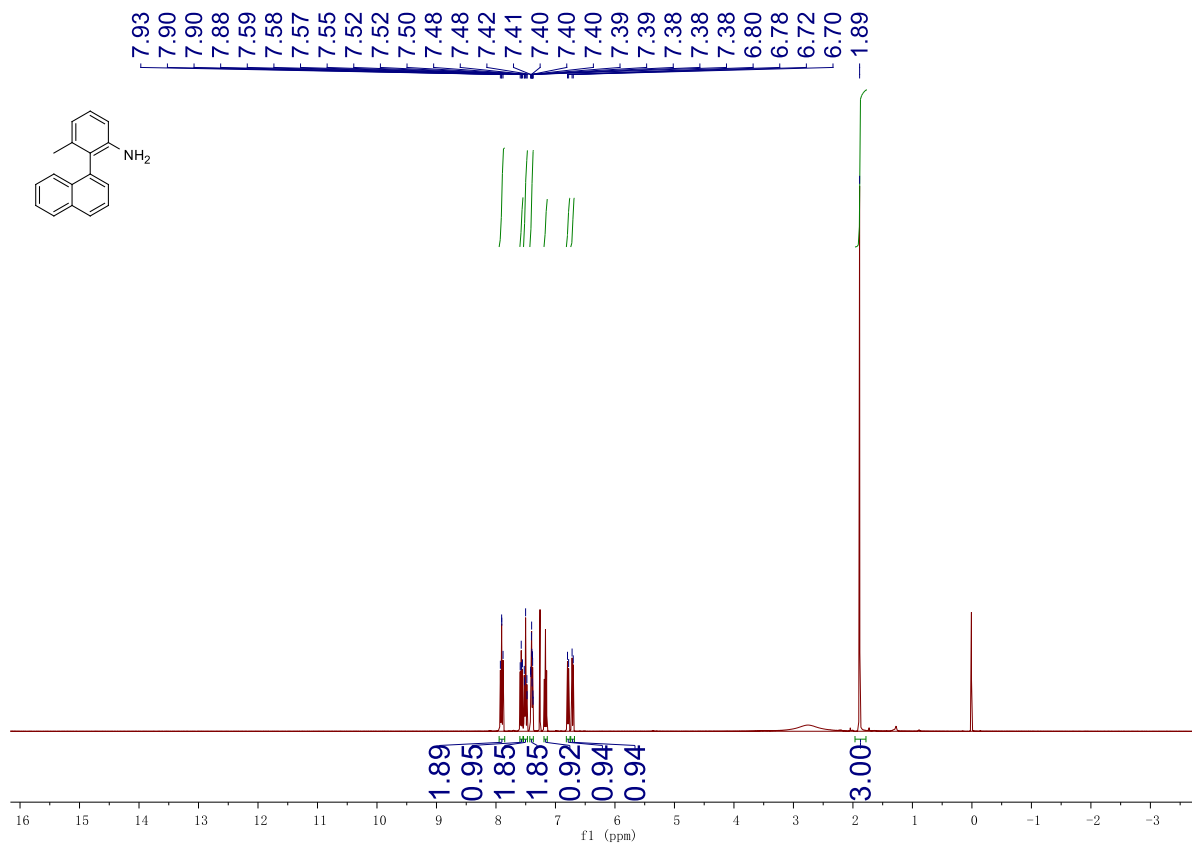

**<sup>1</sup>H NMR Spectrum of 3-methyl-2-(naphthalen-1-yl)aniline (5a)**

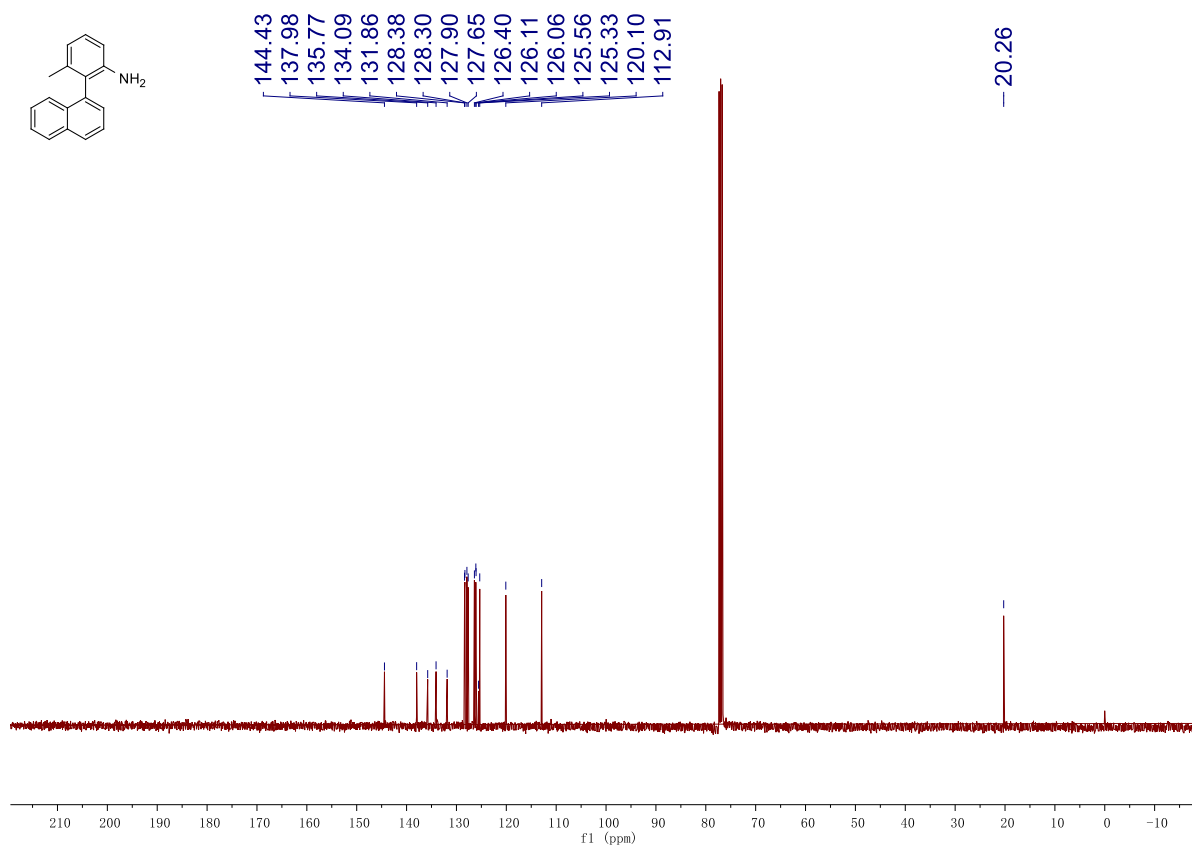

**<sup>13</sup>C NMR Spectrum of 3-methyl-2-(naphthalen-1-yl)aniline (5a)**

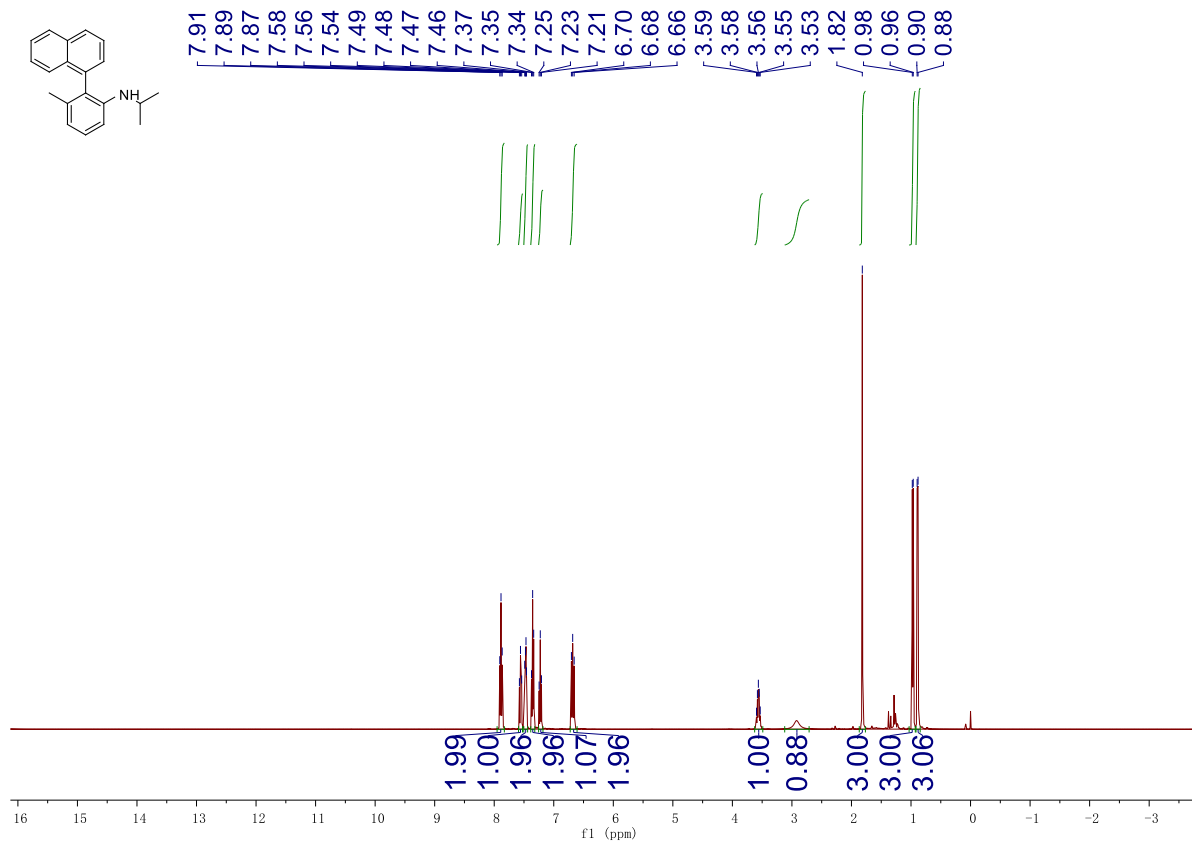

**<sup>1</sup>H NMR Spectrum of *N*-isopropyl-3-methyl-2-(naphthalen-1-yl)aniline (5b)**

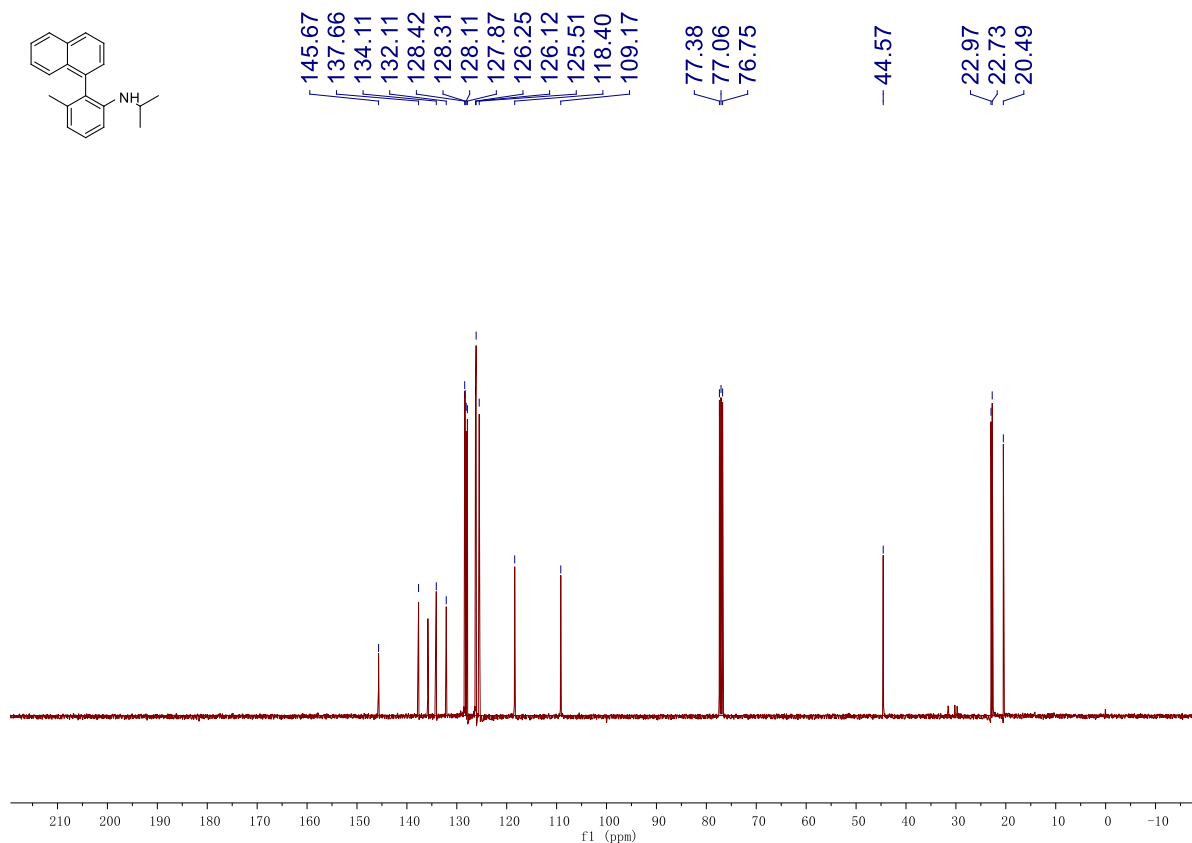

**<sup>13</sup>C NMR Spectrum of *N*-isopropyl-3-methyl-2-(naphthalen-1-yl)aniline (5b)**

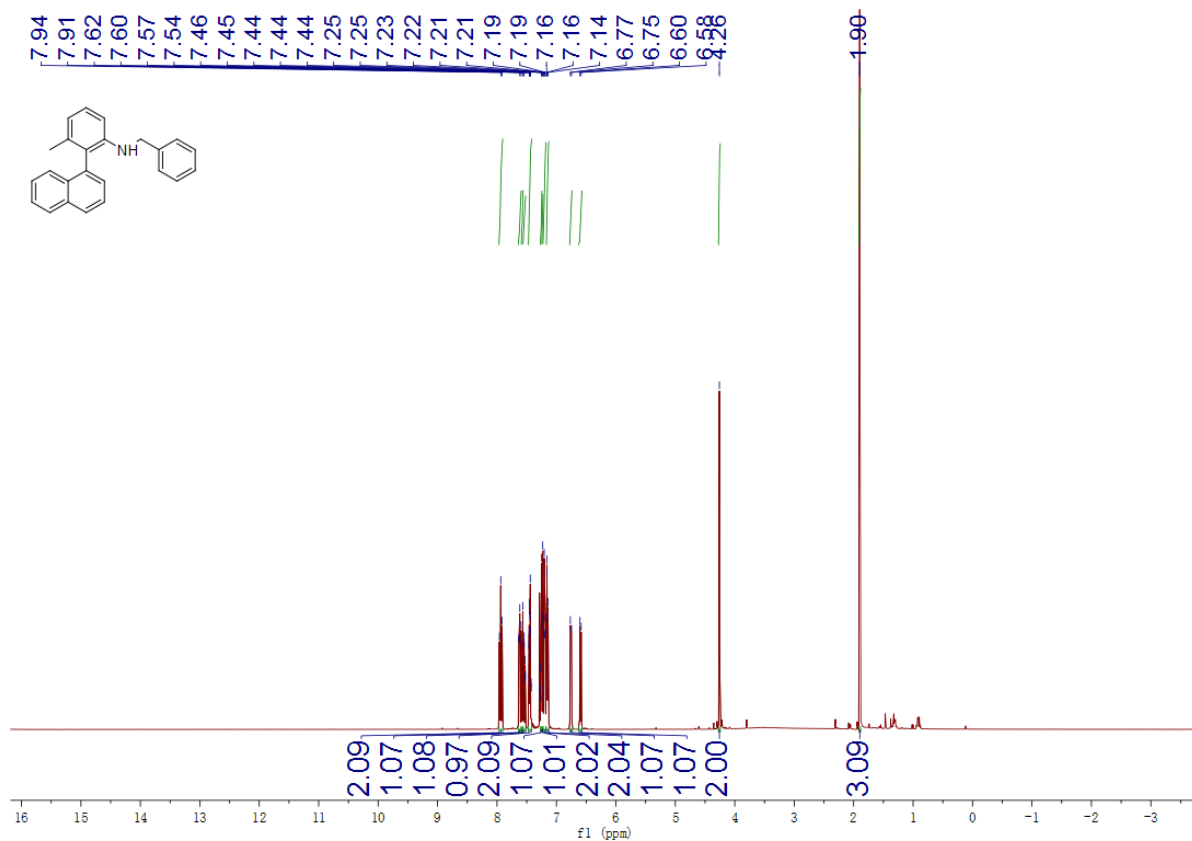

**<sup>1</sup>H NMR Spectrum of *N*-benzyl-3-methyl-2-(naphthalen-1-yl)aniline (5c)**

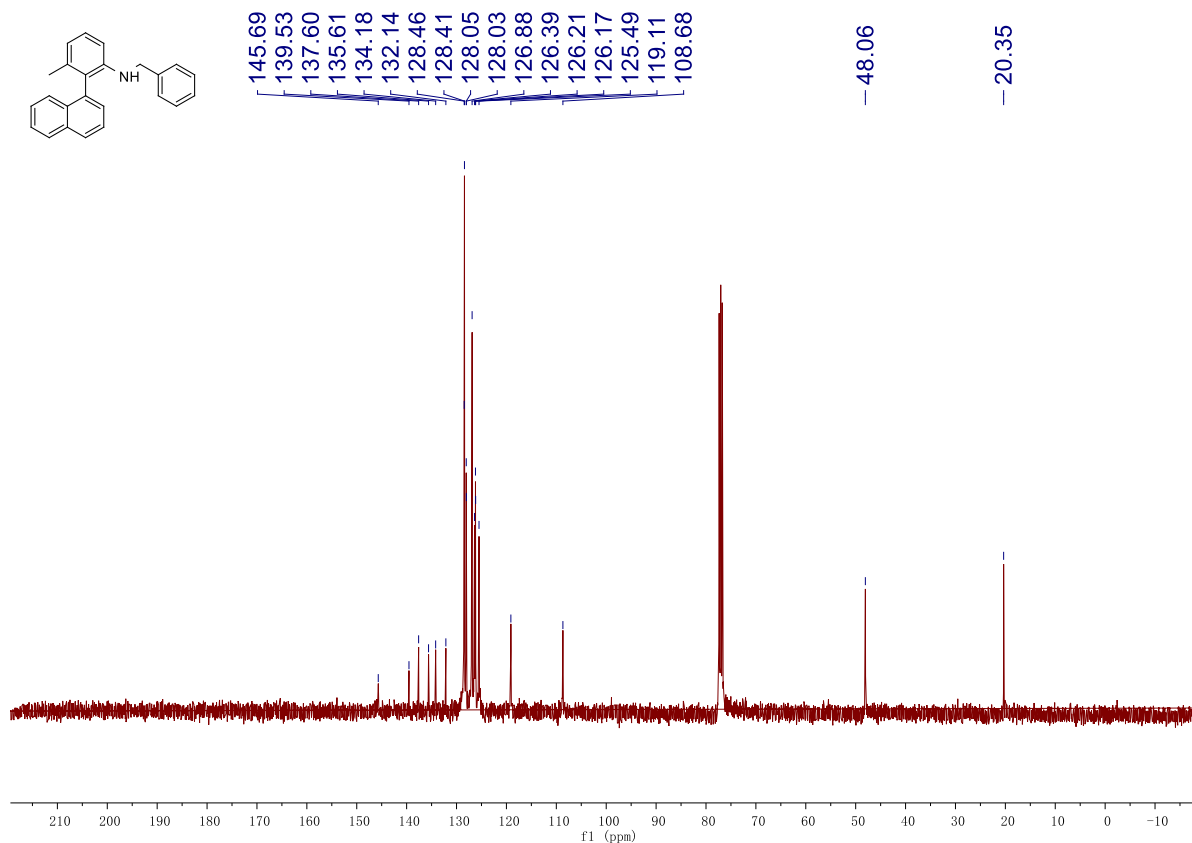

**<sup>13</sup>C NMR Spectrum of *N*-benzyl-3-methyl-2-(naphthalen-1-yl)aniline (5c)**

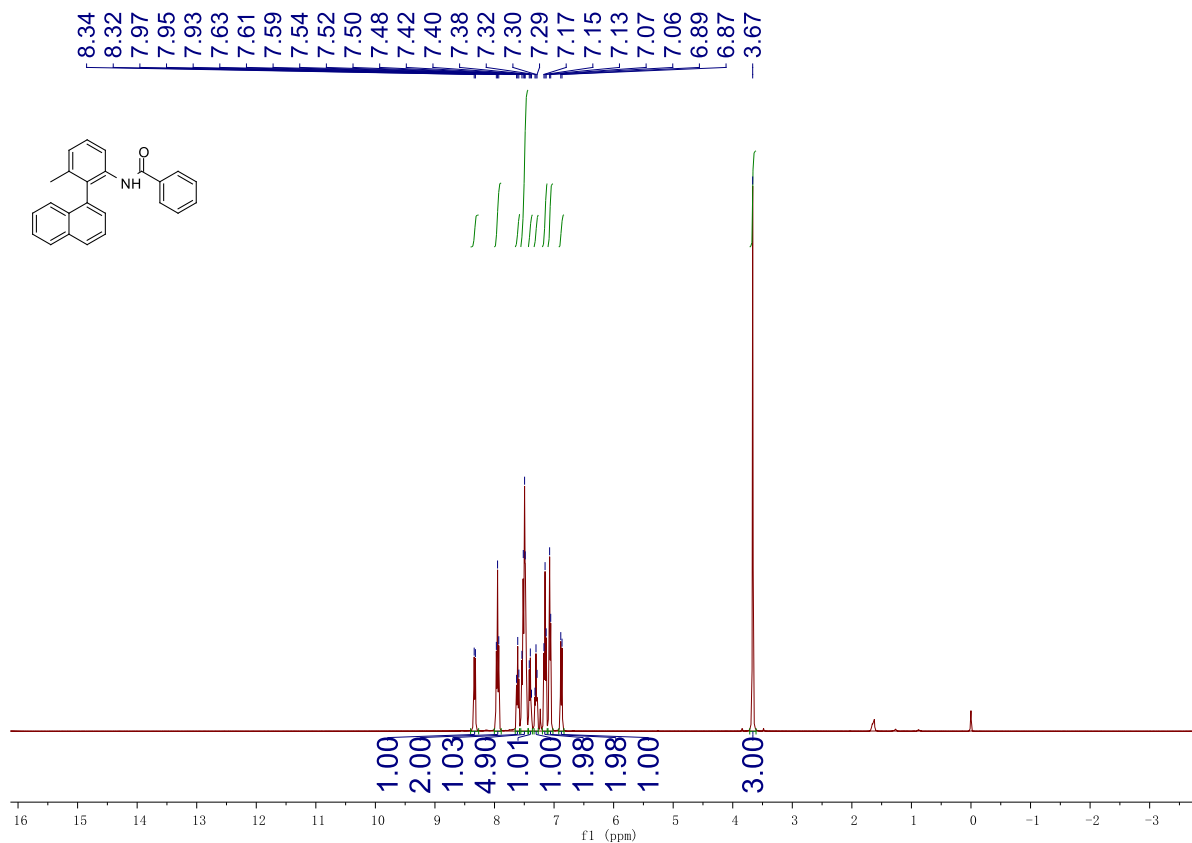

**<sup>1</sup>H NMR Spectrum of *N*-(3-methyl-2-(naphthalen-1-yl)phenyl)benzamide (5d)**

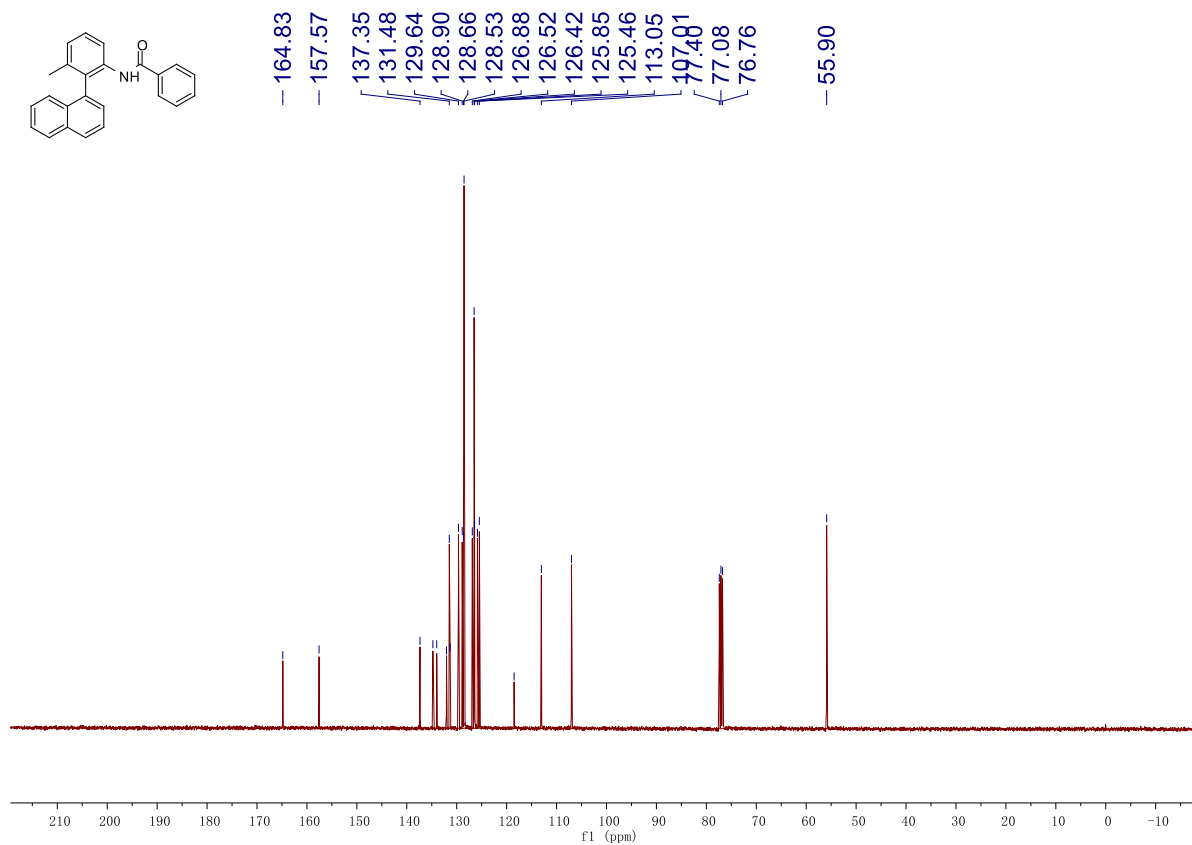

**<sup>13</sup>C NMR Spectrum of *N*-(3-methyl-2-(naphthalen-1-yl)phenyl)benzamide (5d)**



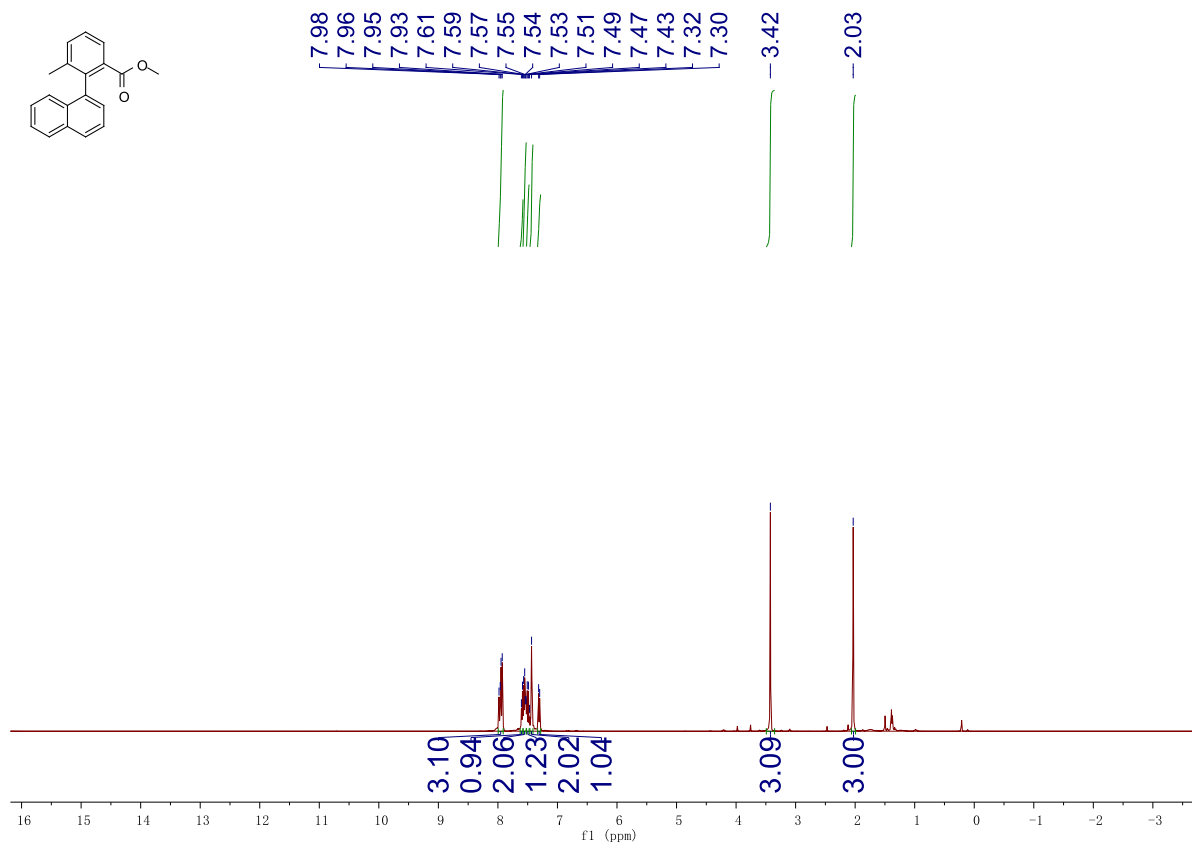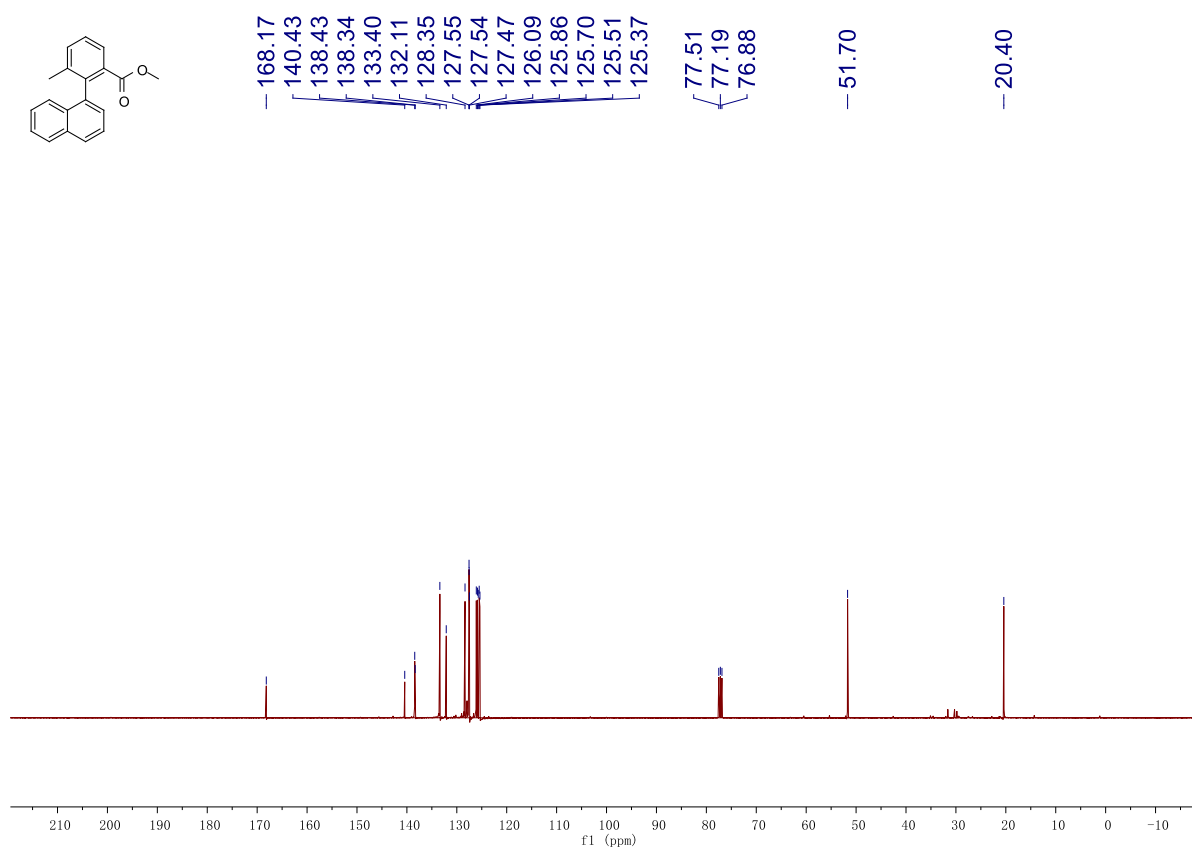

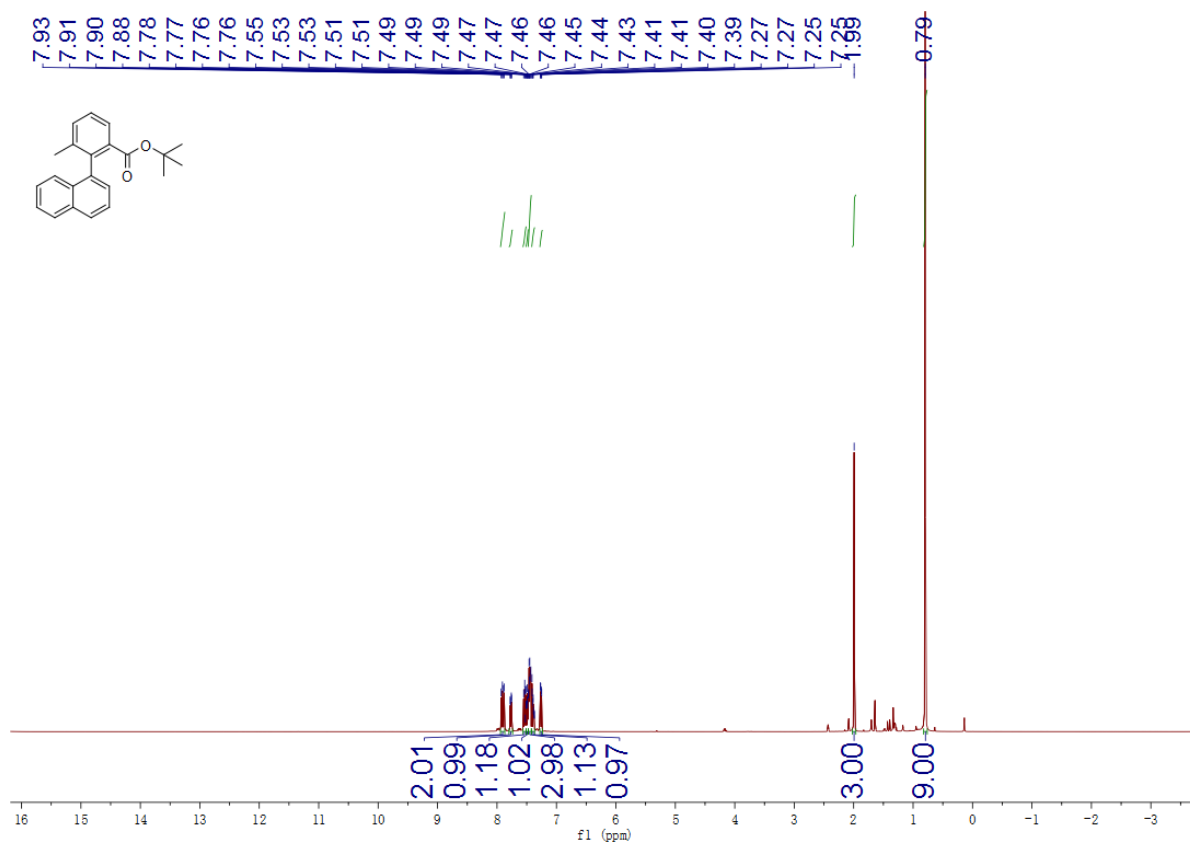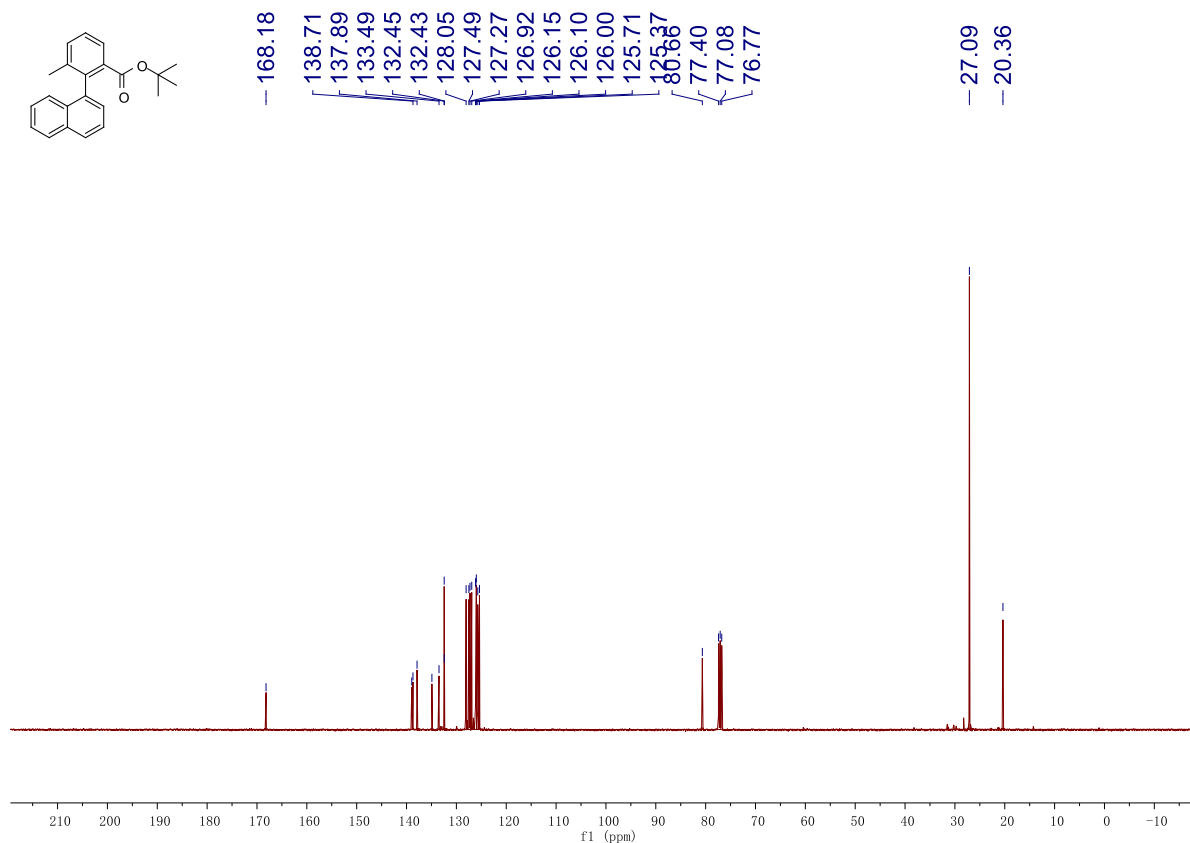

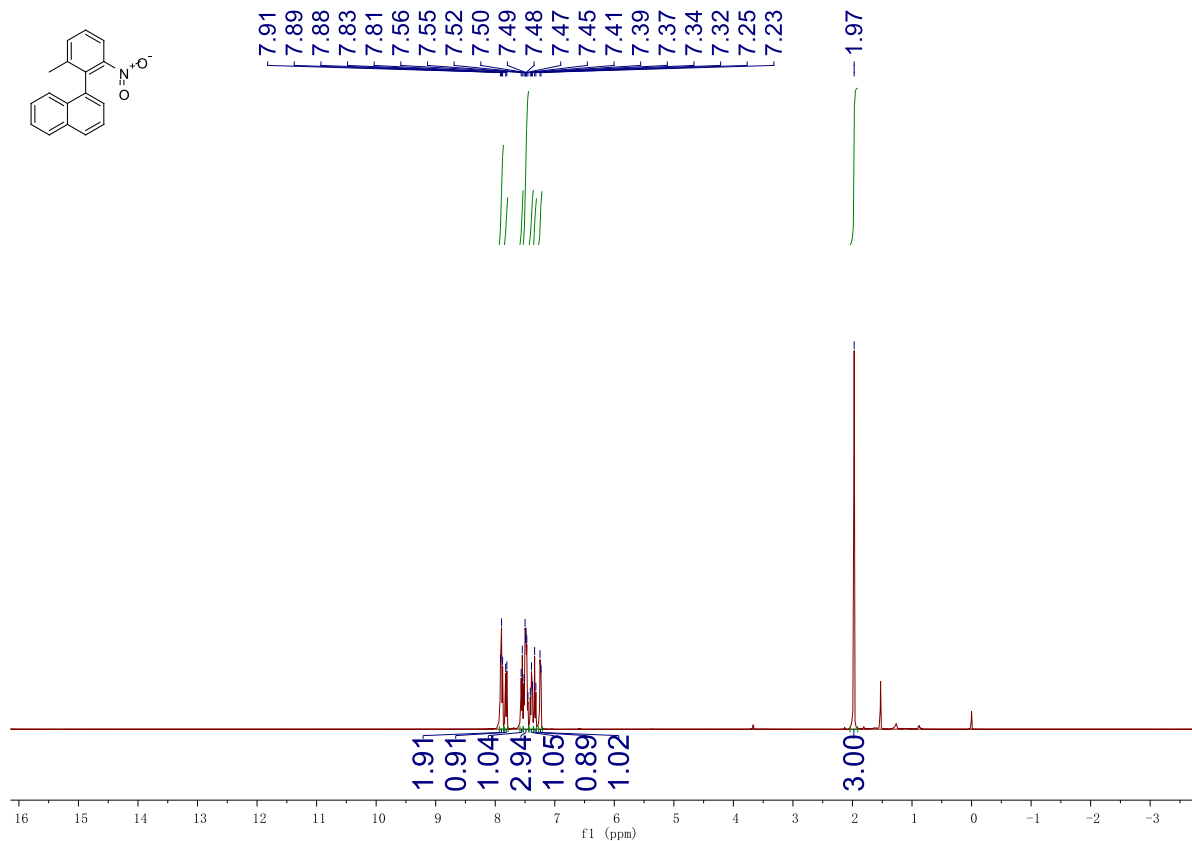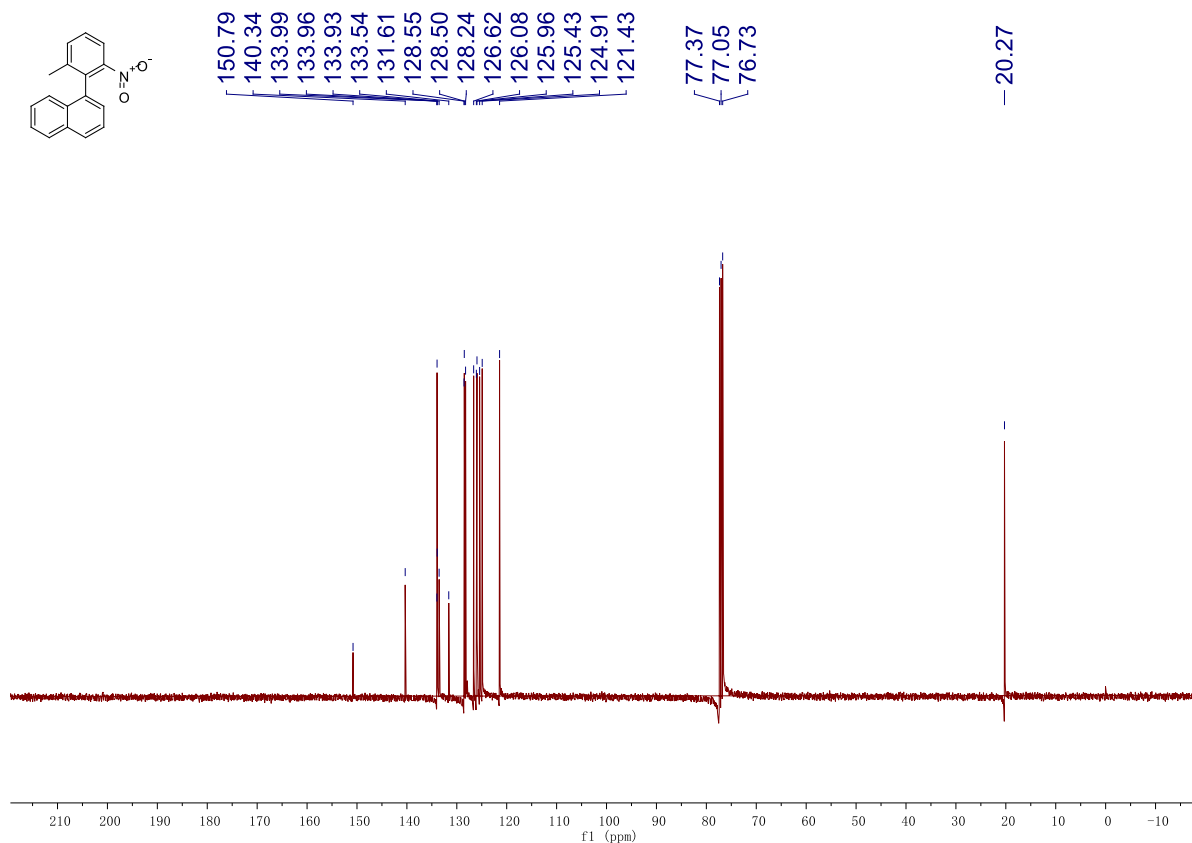

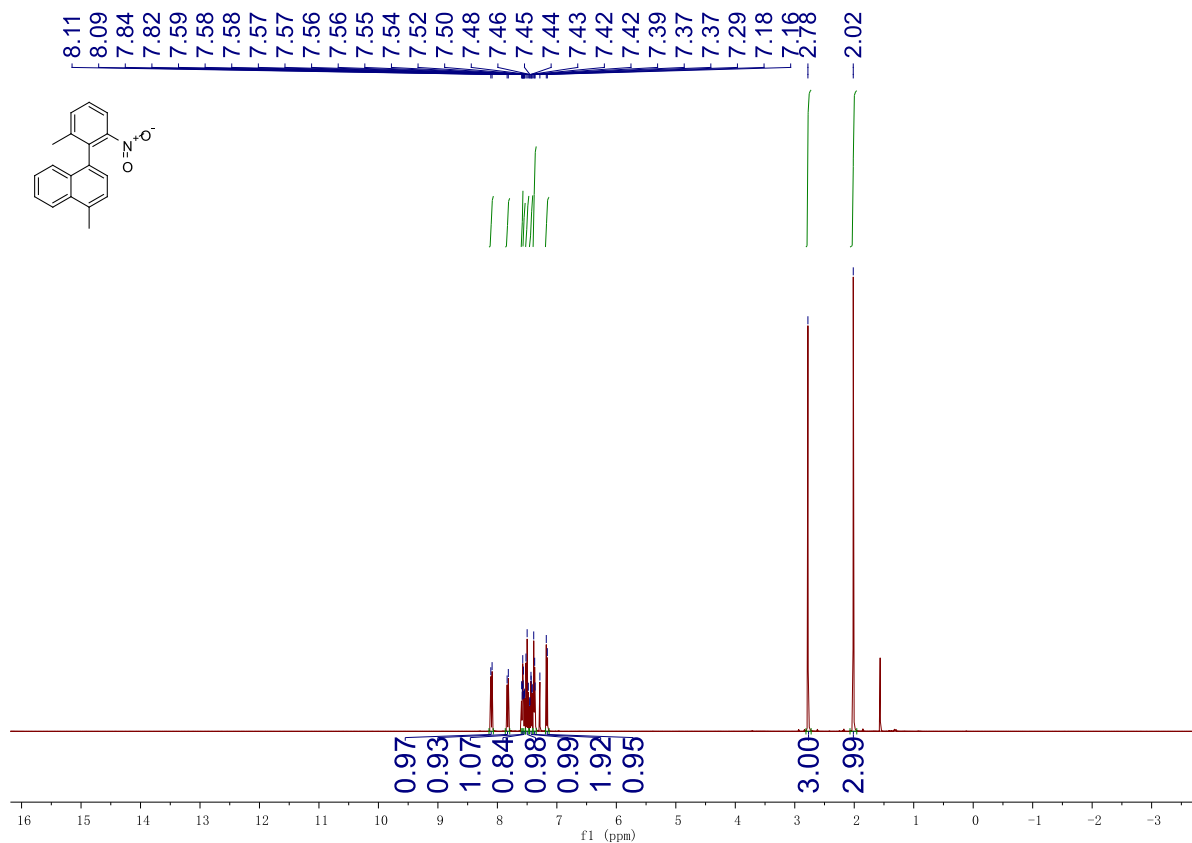

**<sup>1</sup>H NMR Spectrum of 1-methyl-4-(2-methyl-6-nitrophenyl)naphthalene (5h)**

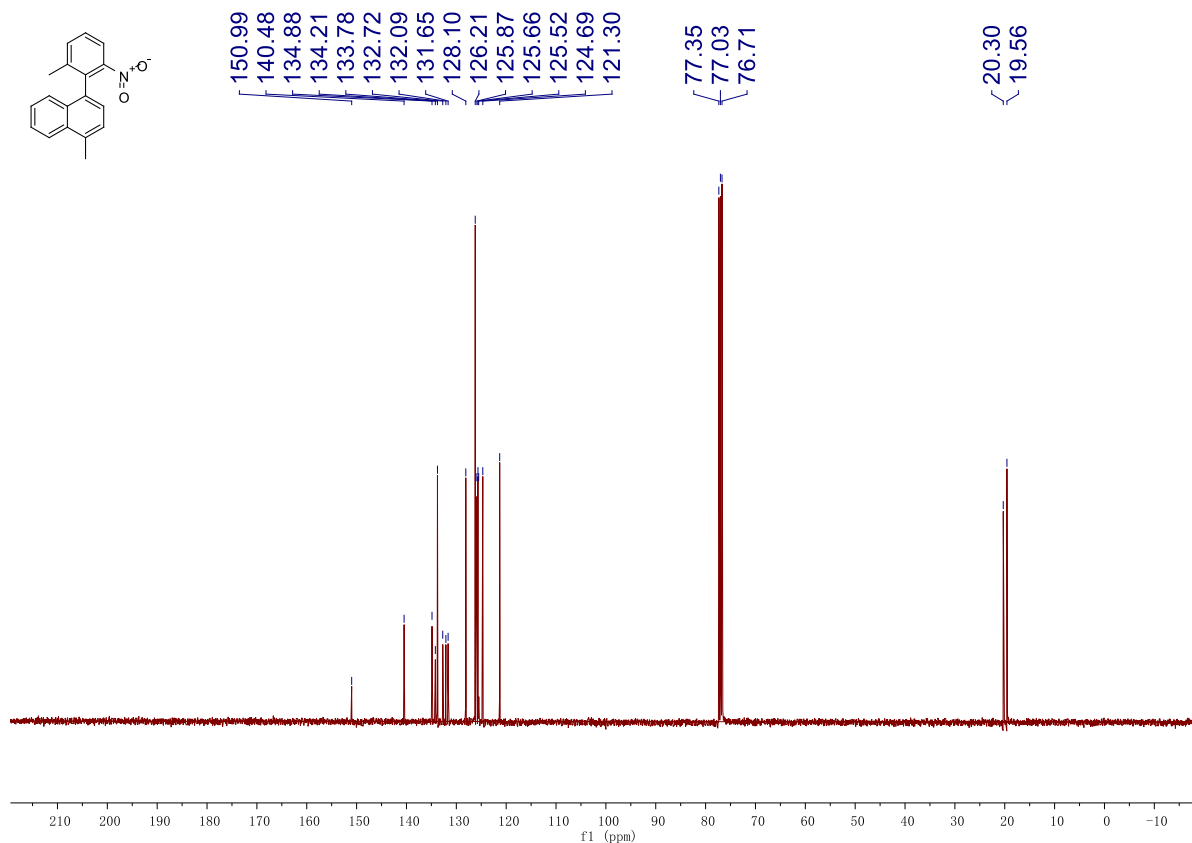

**<sup>13</sup>C NMR Spectrum of 1-methyl-4-(2-methyl-6-nitrophenyl)naphthalene (5h)**

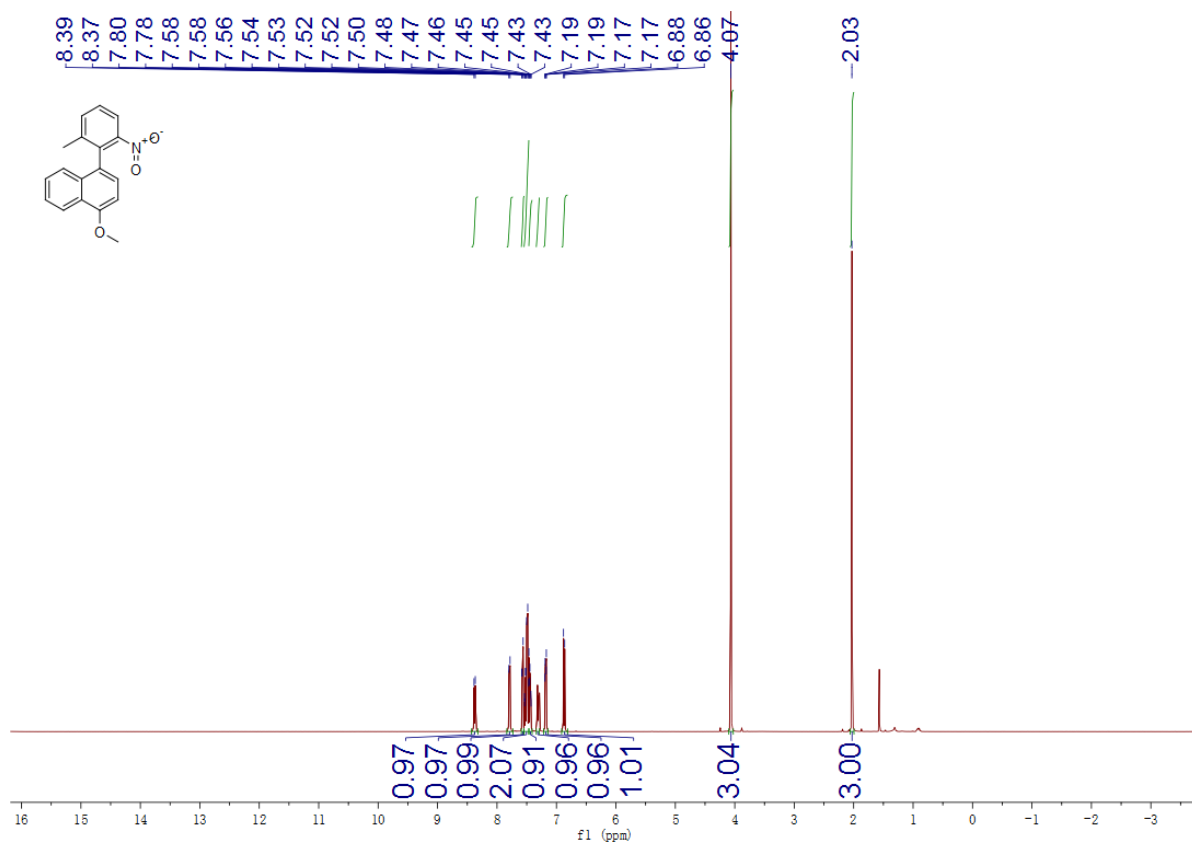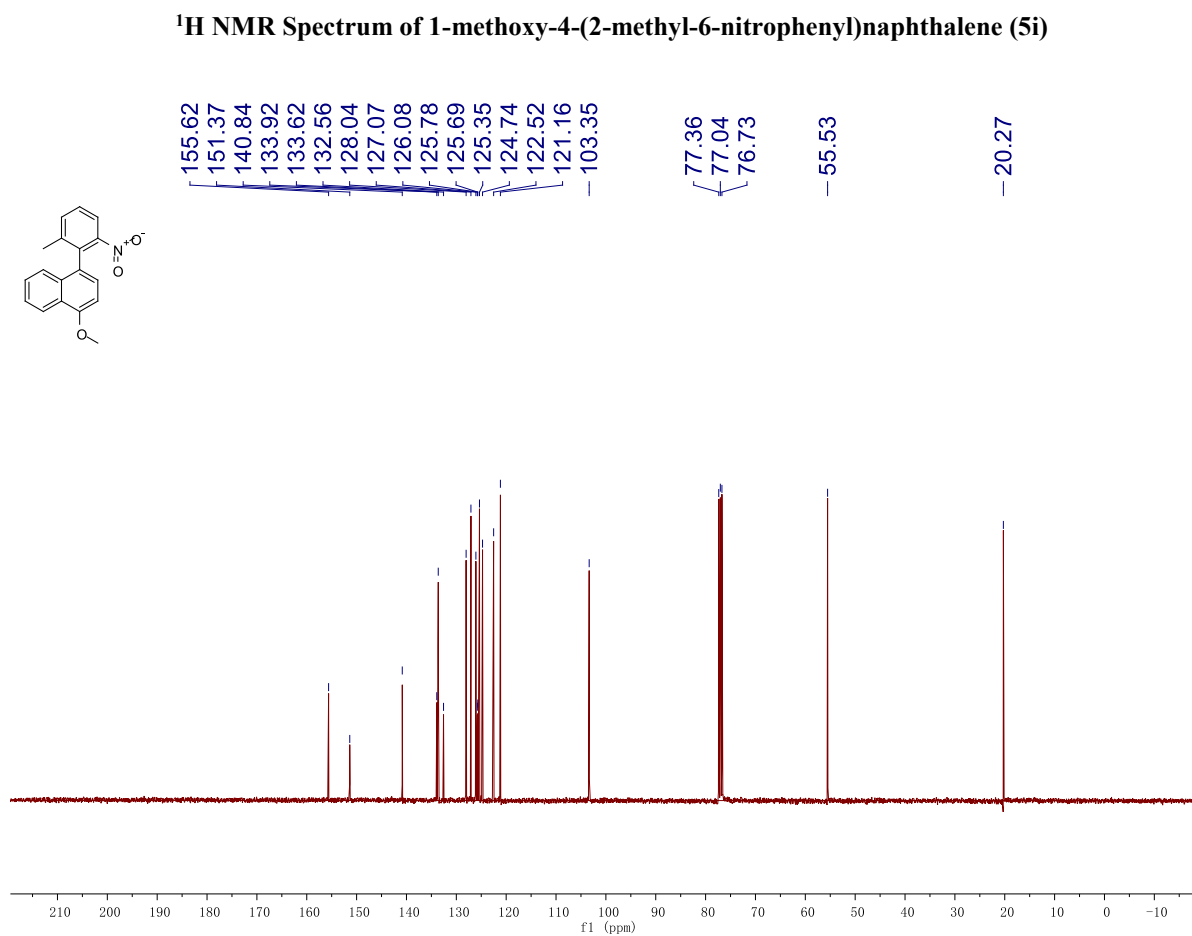

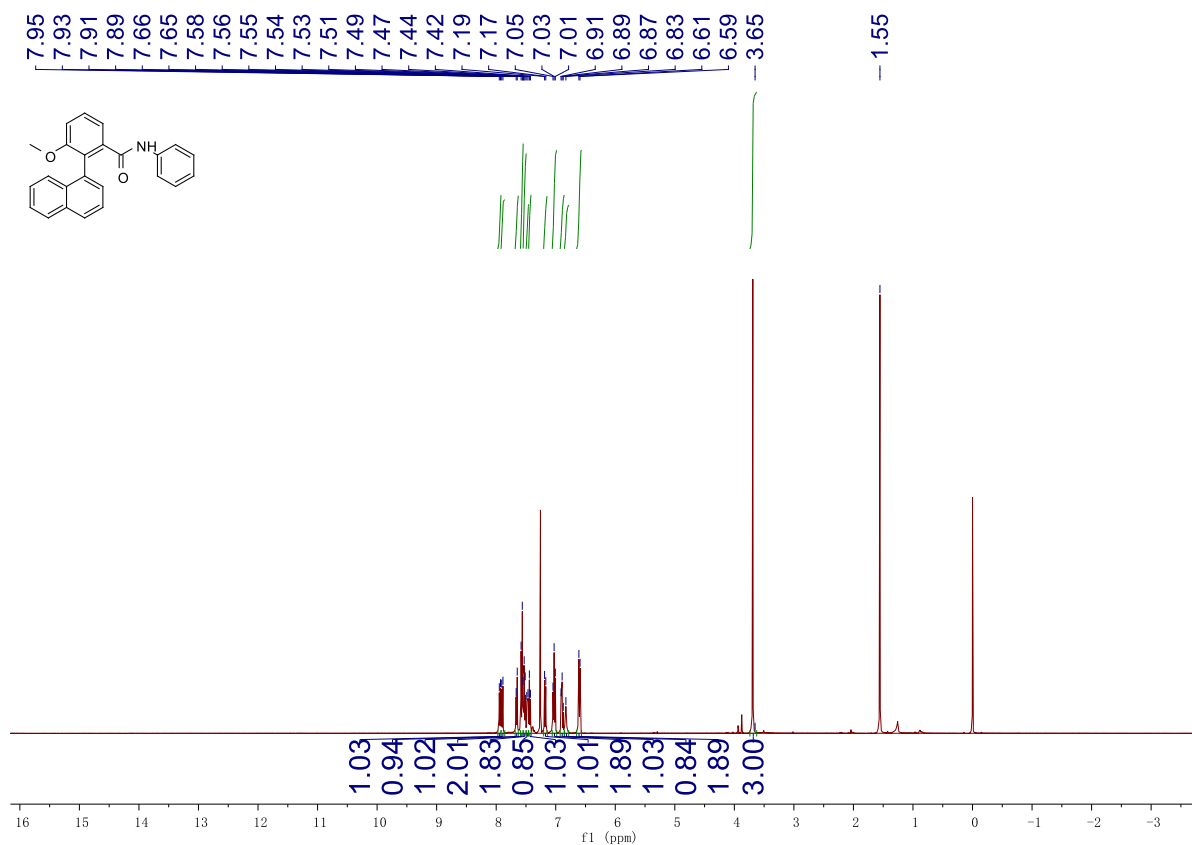

**<sup>1</sup>H NMR Spectrum of 3-methoxy-2-(naphthalen-1-yl)-*N*-phenylbenzamide (3s)**

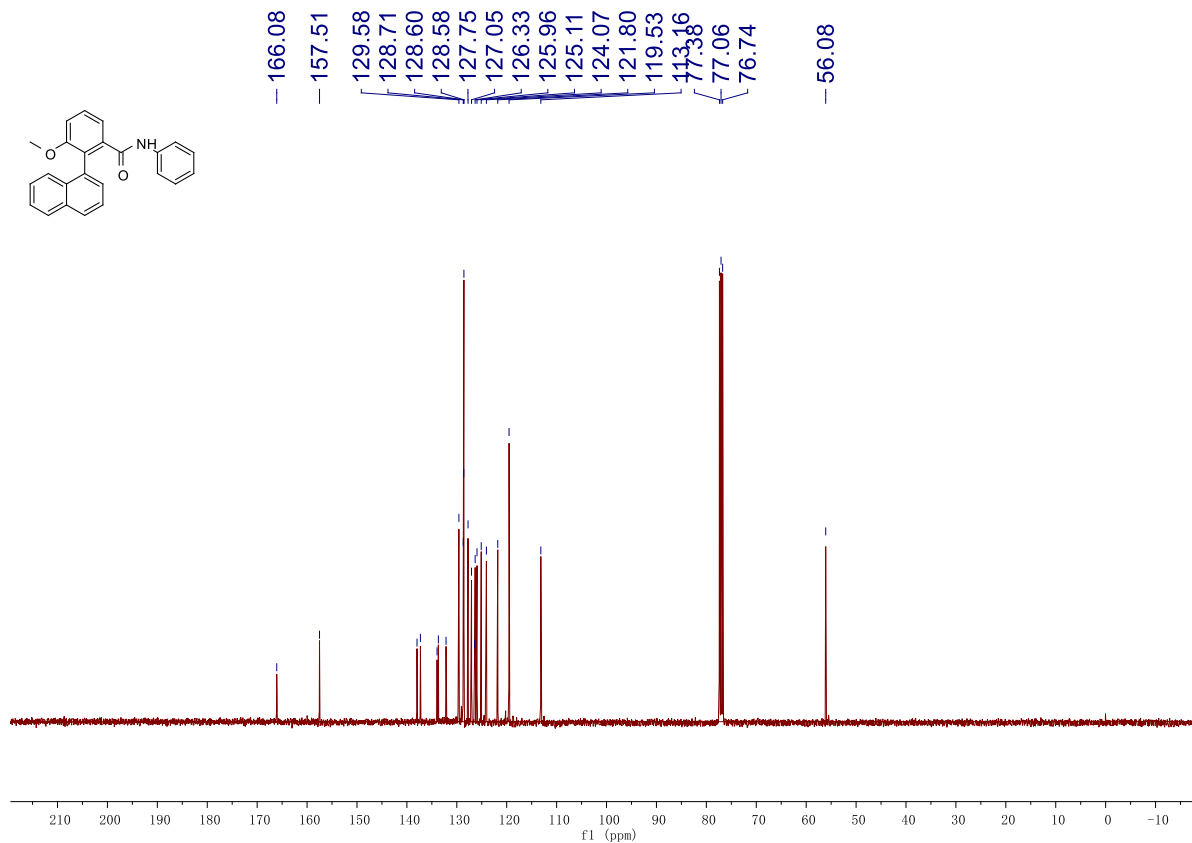

**<sup>13</sup>C NMR Spectrum of 3-methoxy-2-(naphthalen-1-yl)-*N*-phenylbenzamide (3s)**

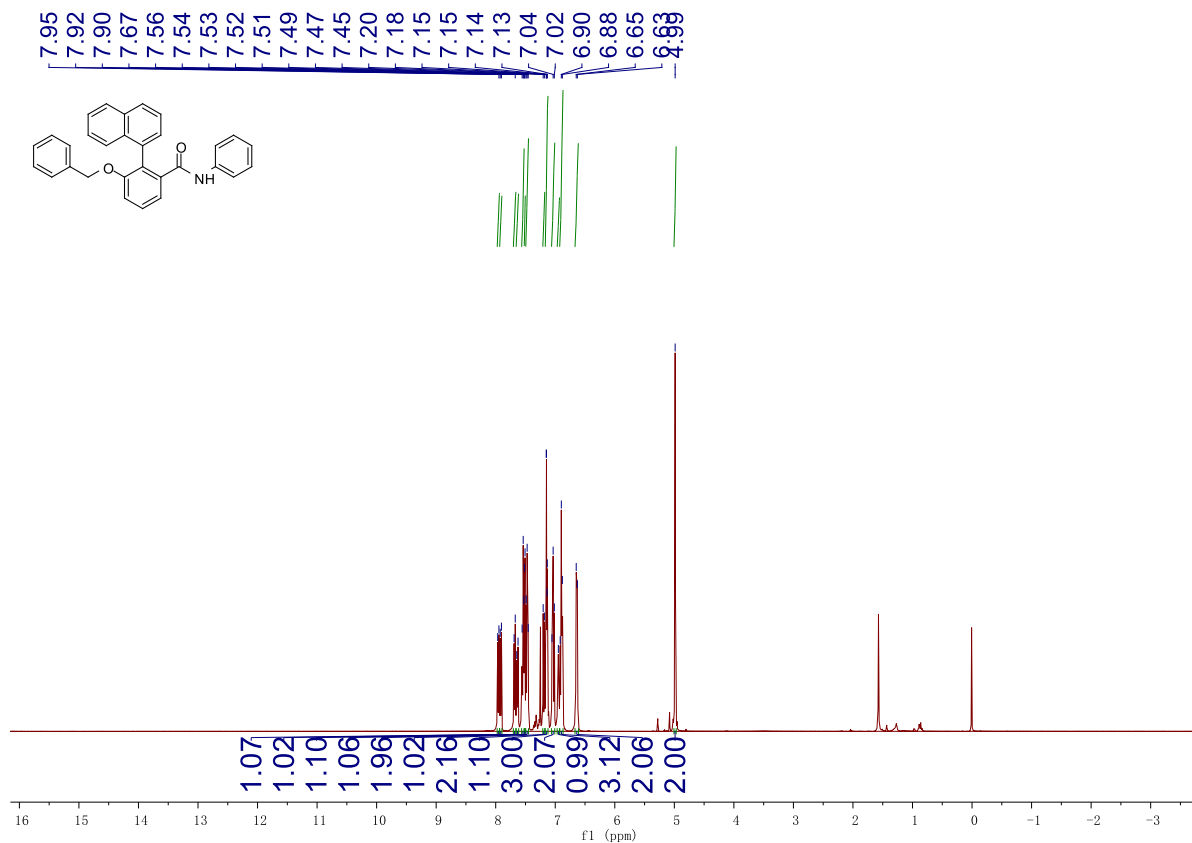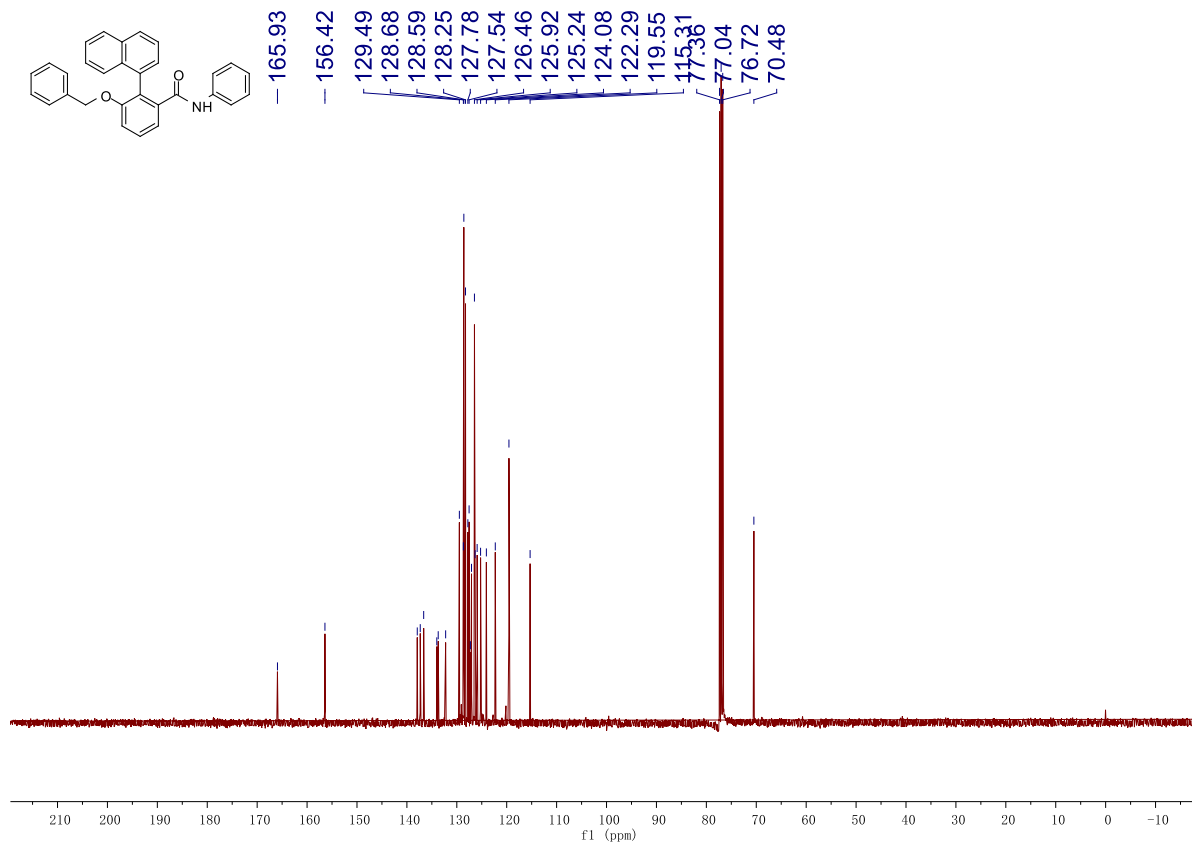

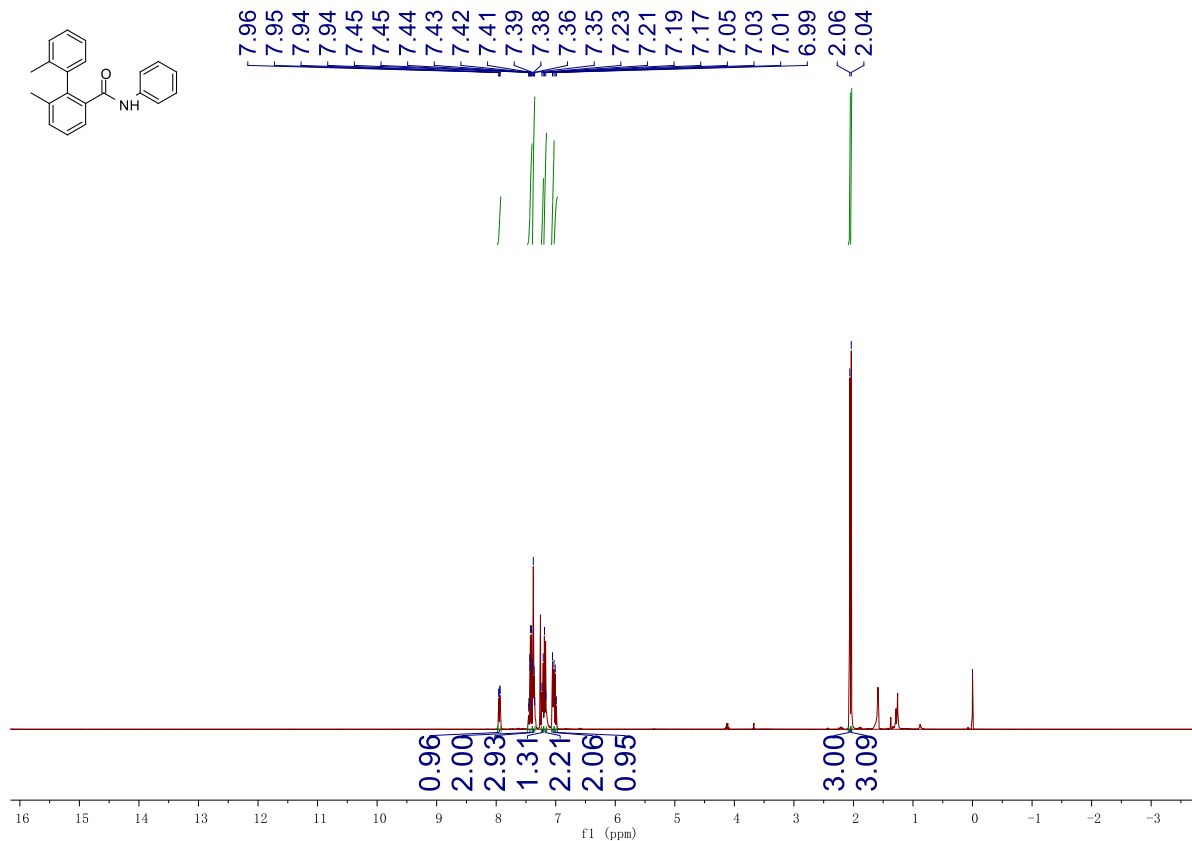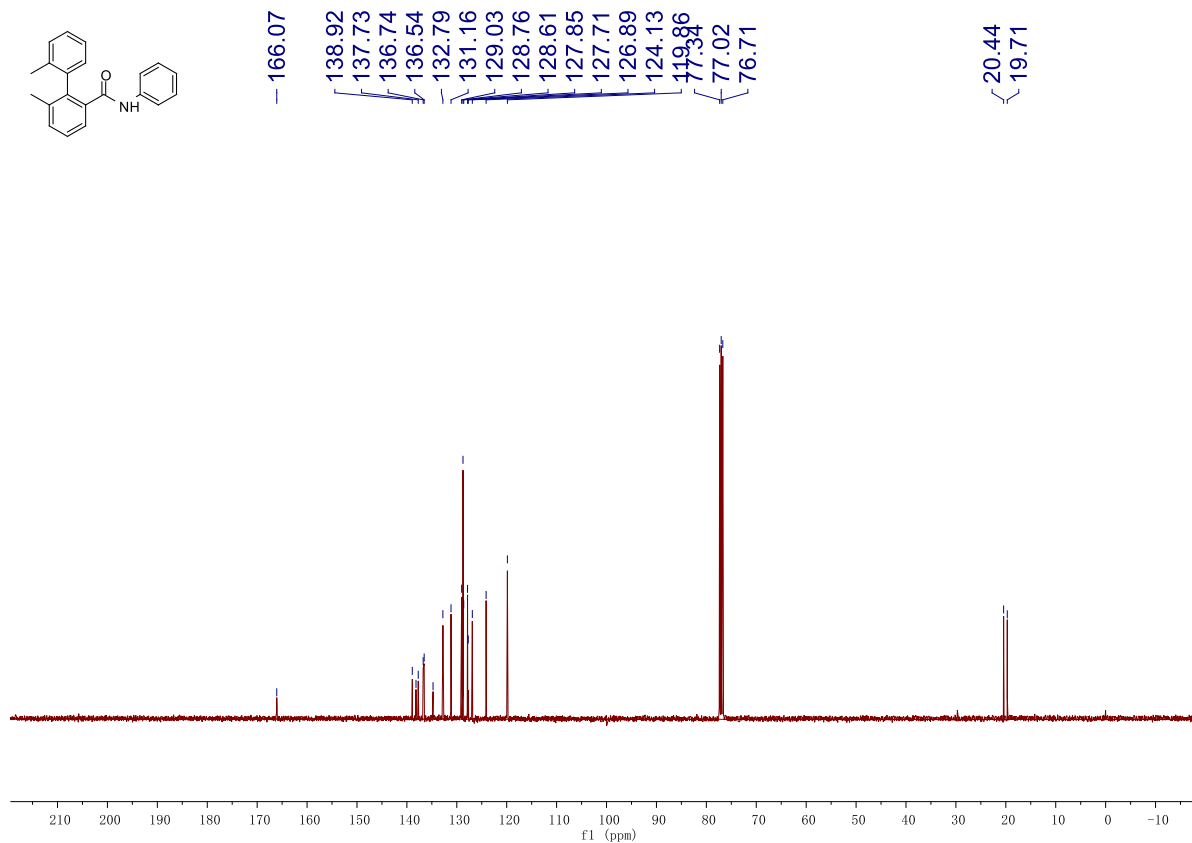



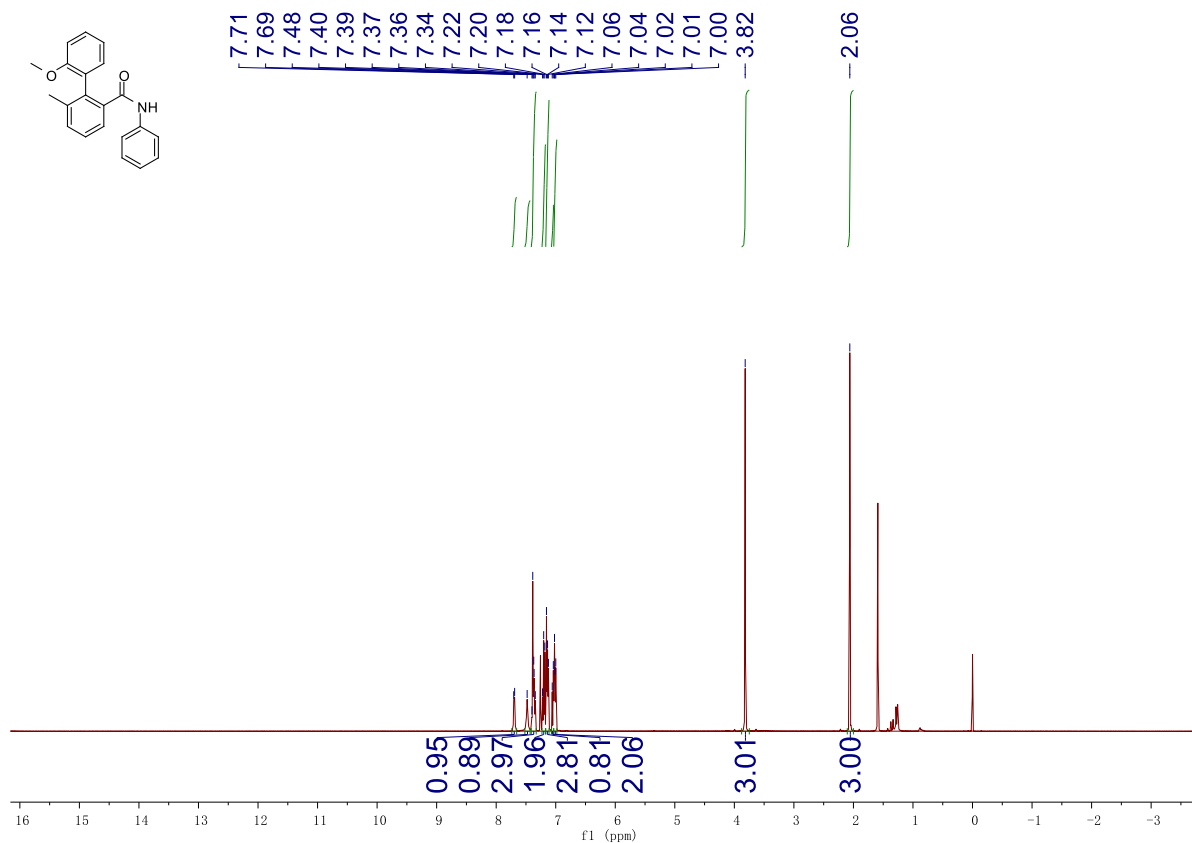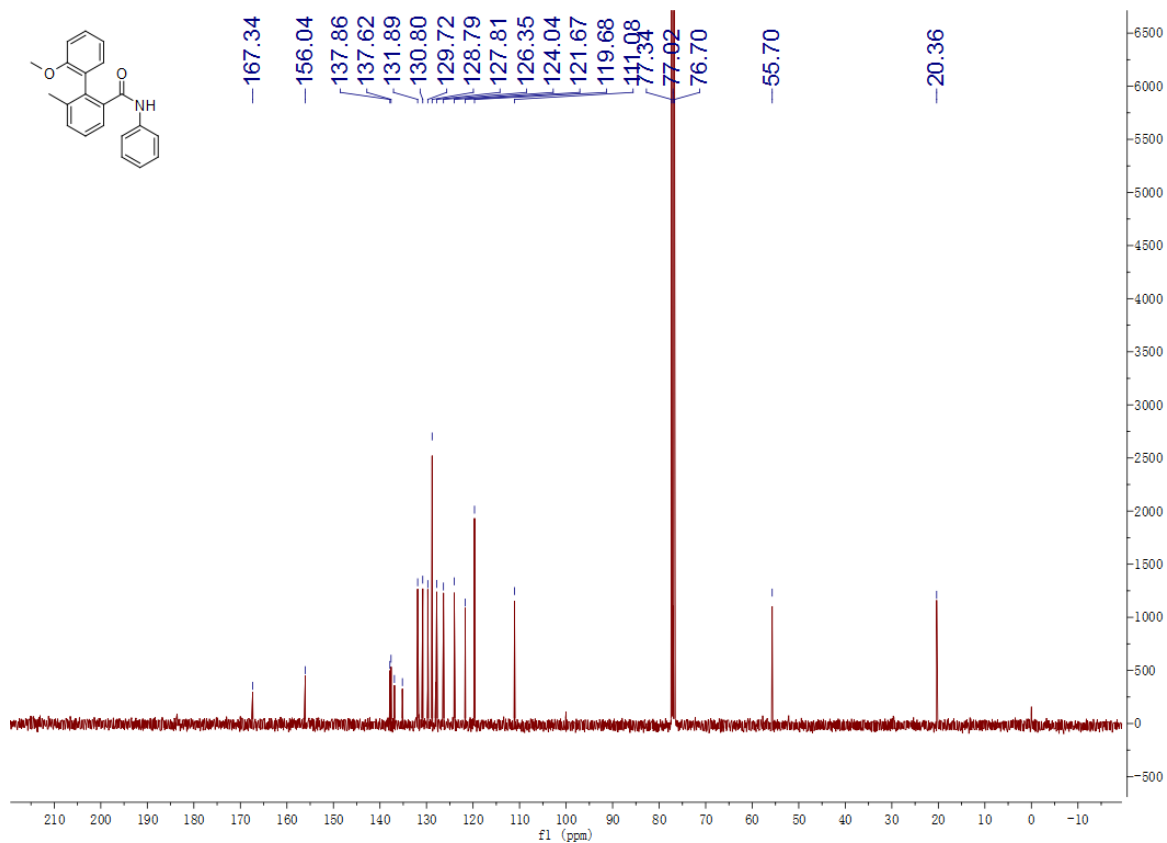

## Copies of HPLC Chromatograms

HPLC Spectra of 3-methyl-2-(naphthalen-1-yl)-*N*-propylbenzamide

(3a)

(The top one is racemic, and the bottom one is chiral)

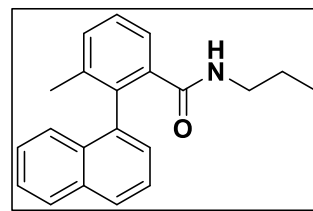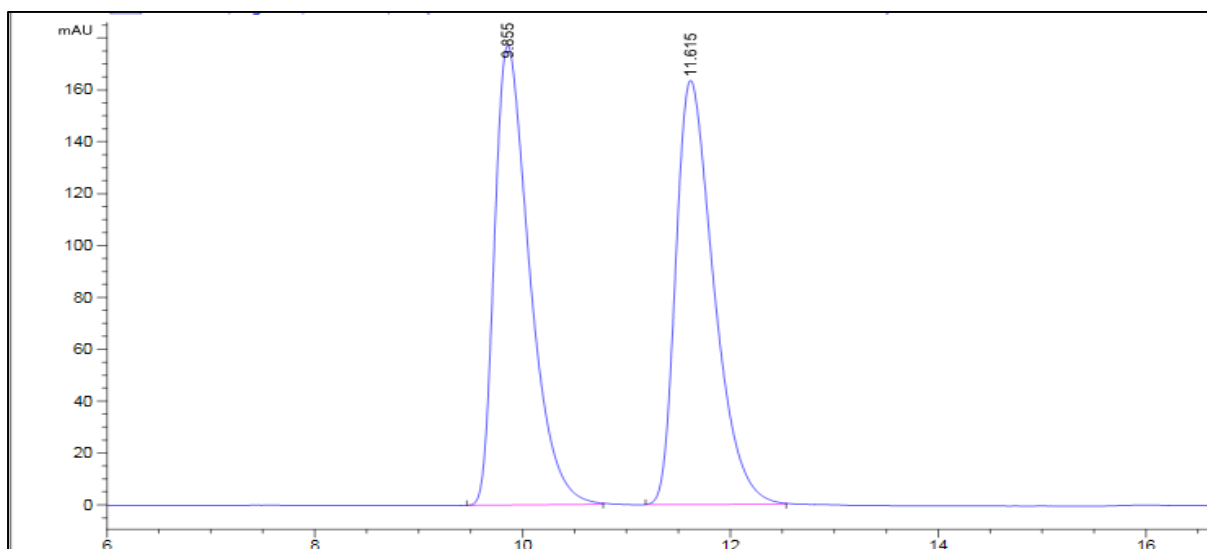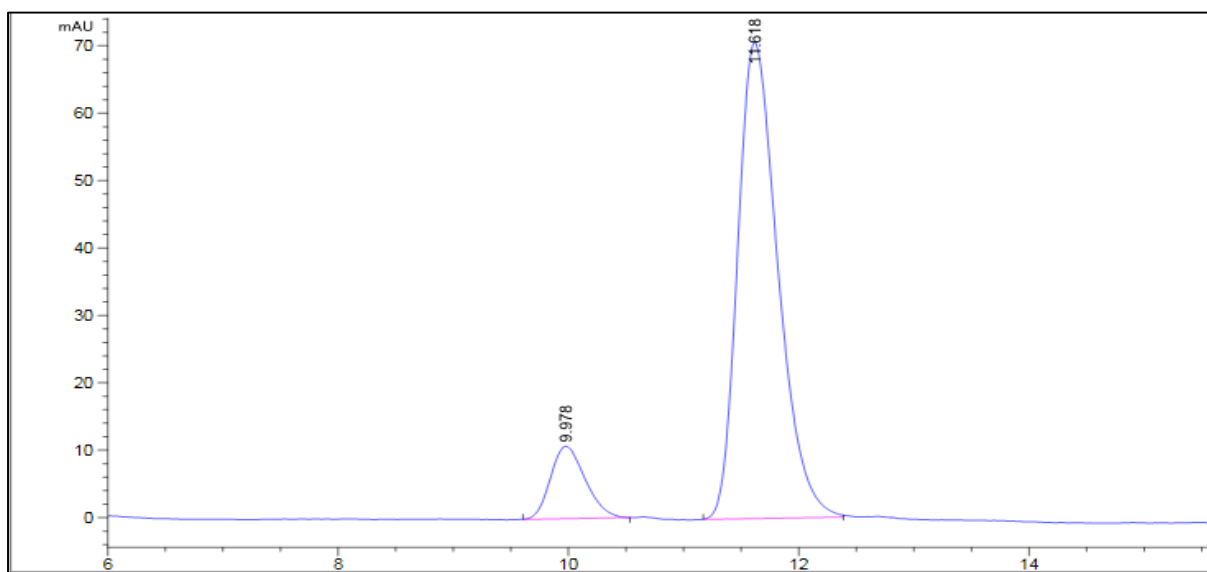

| Entry # | RetTime [min] | Width [min] | Area [mAU*s] | Height [mAU] | Area %  |
|---------|---------------|-------------|--------------|--------------|---------|
| 1       | 9.978         | 0.3219      | 224.22993    | 10.72723     | 11.5749 |
| 2       | 11.618        | 0.3728      | 1712.97717   | 70.67101     | 88.4251 |

### HPLC Spectra of *N*-isopropyl-3-methyl-2-(naphthalen-1-yl)benzamide (3b)

(The top one is racemic, and the bottom one is chiral)

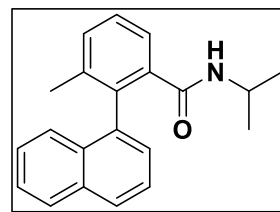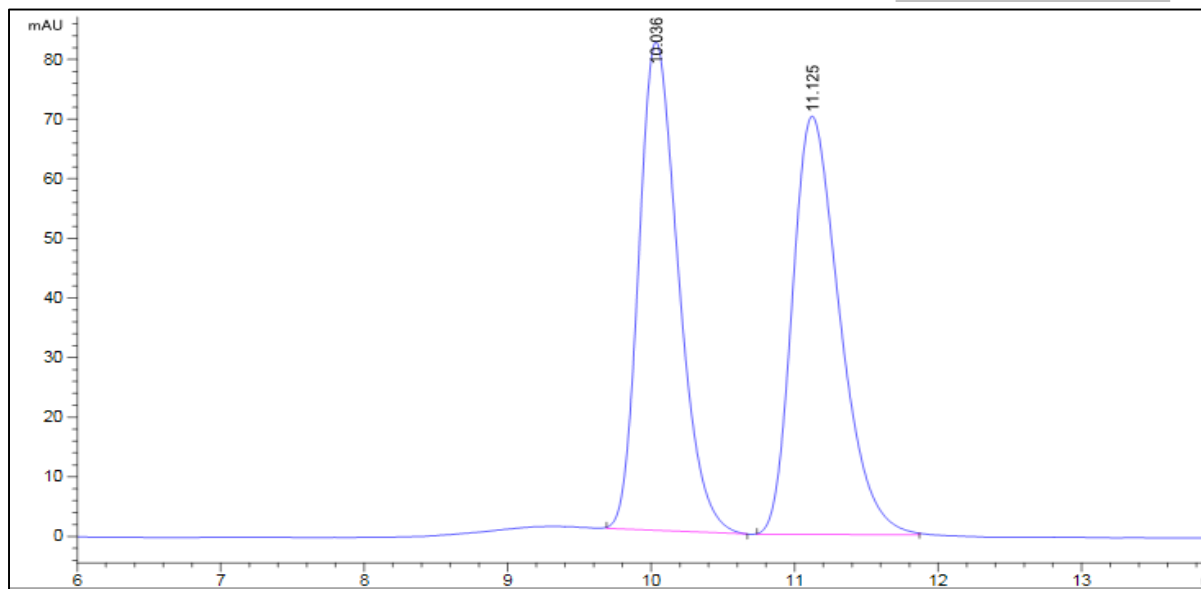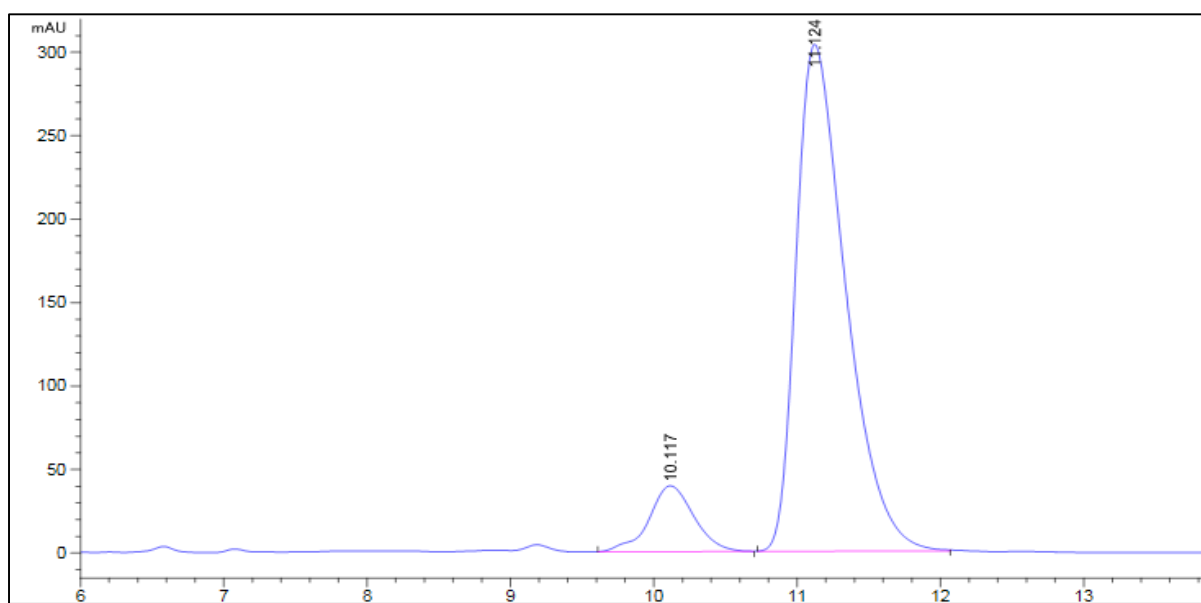

| Entry # | RetTime [min] | Width [min] | Area [mAU*s] | Height [mAU] | Area %  |
|---------|---------------|-------------|--------------|--------------|---------|
| 1       | 10.117        | 0.3332      | 863.67535    | 39.47809     | 10.5638 |
| 2       | 11.124        | 0.3690      | 7312.15186   | 303.58383    | 89.4362 |

### HPLC Spectra of *N*-cyclopentyl-3-methyl-2-(naphthalen-1-yl)benzamide (3c)

(The top one is racemic, and the bottom one is chiral)

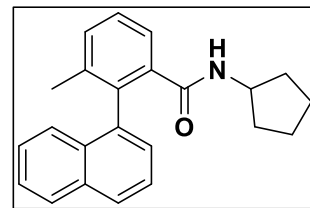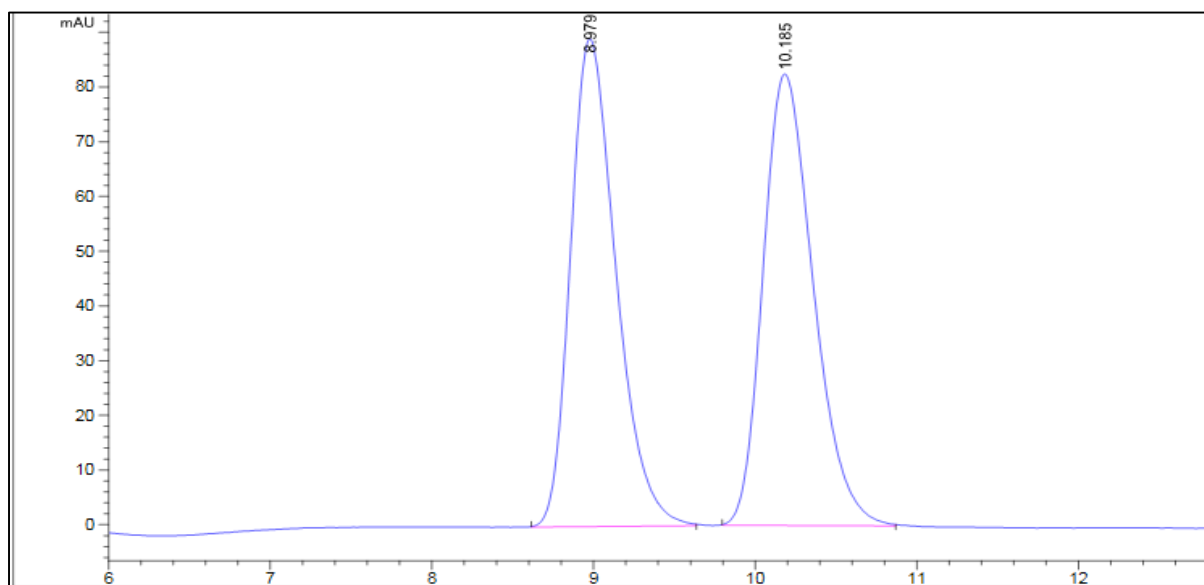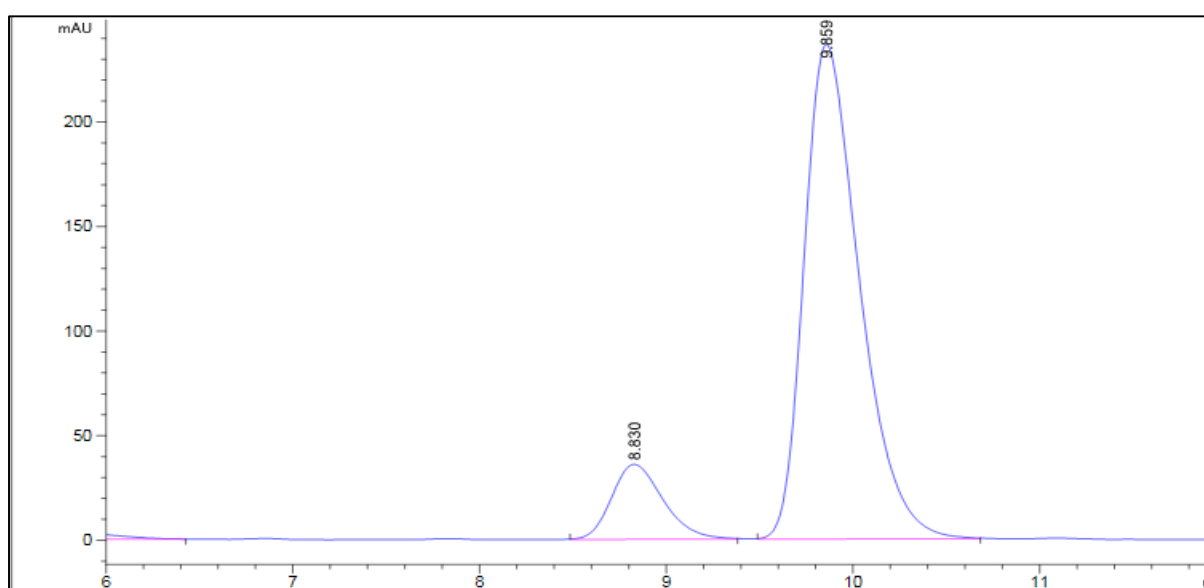

| Entry # | RetTime [min] | Width [min] | Area [mAU*s] | Height [mAU] | Area %  |
|---------|---------------|-------------|--------------|--------------|---------|
| 1       | 8.830         | 0.2951      | 685.13452    | 35.82714     | 12.3122 |
| 2       | 9.859         | 0.3148      | 4879.55713   | 236.44583    | 87.6878 |

HPLC Spectra of *N*-cyclohexyl-3-methyl-2-(naphthalen-1-yl)benzamide (3d)

(The top one is racemic, and the bottom one is chiral)

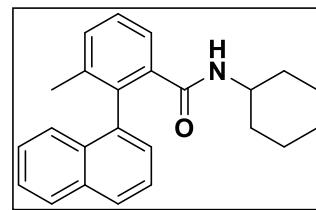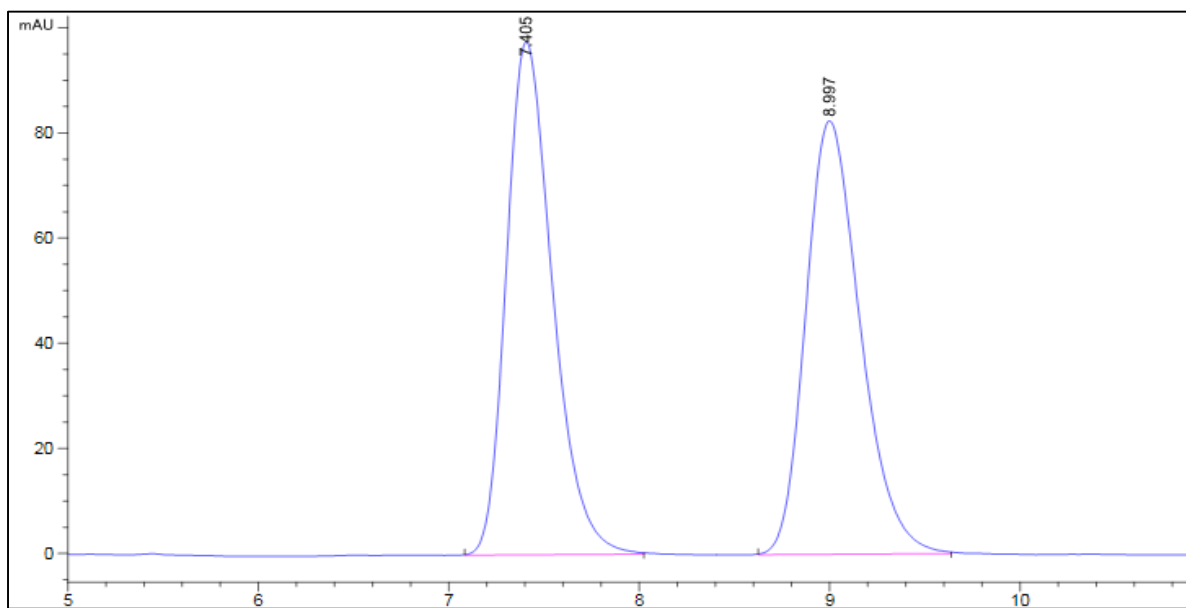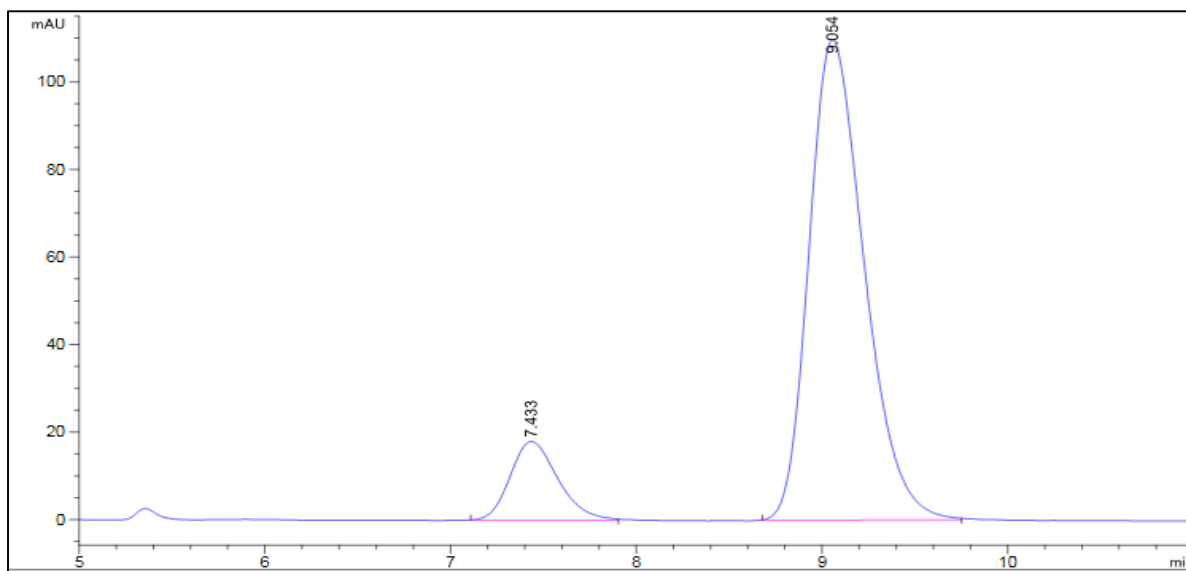

| Entry # | RetTime [min] | Width [min] | Area [mAU*s] | Height [mAU] | Area %  |
|---------|---------------|-------------|--------------|--------------|---------|
| 1       | 7.433         | 0.2726      | 321.84262    | 18.00181     | 12.4258 |
| 2       | 9.054         | 0.3192      | 2268.27881   | 109.72440    | 87.5742 |

HPLC Spectra of 3-methyl-2-(naphthalen-1-yl)phenyl(pyrrolidin-1-yl)methanone (3e)

(The top one is racemic, and the bottom one is chiral)

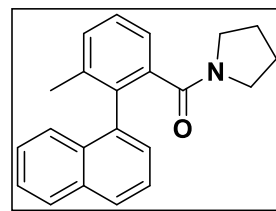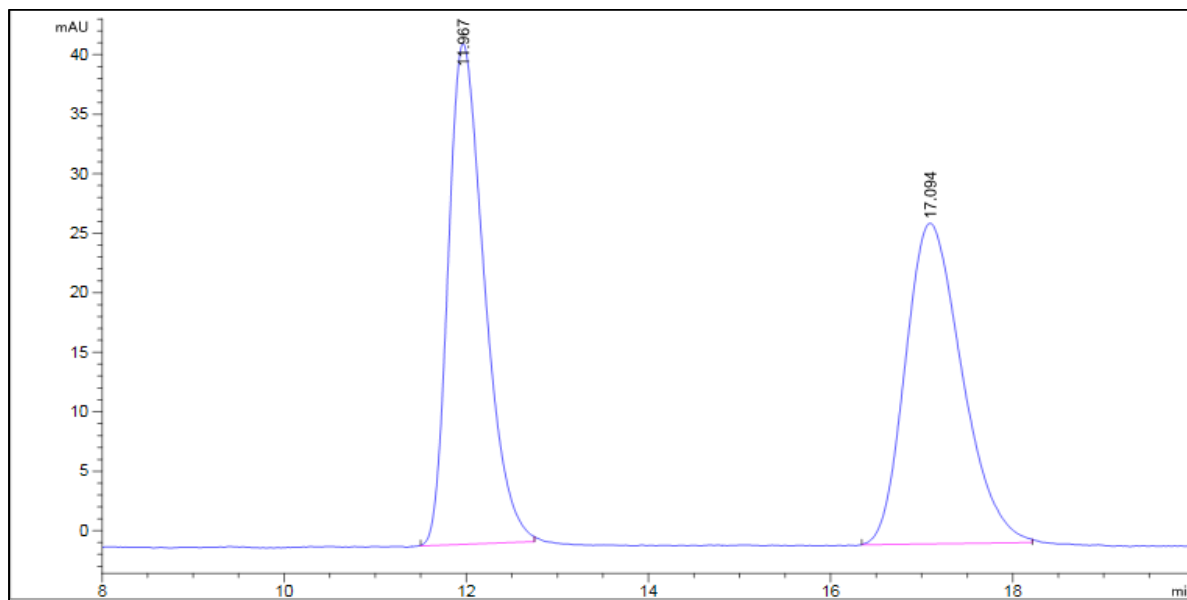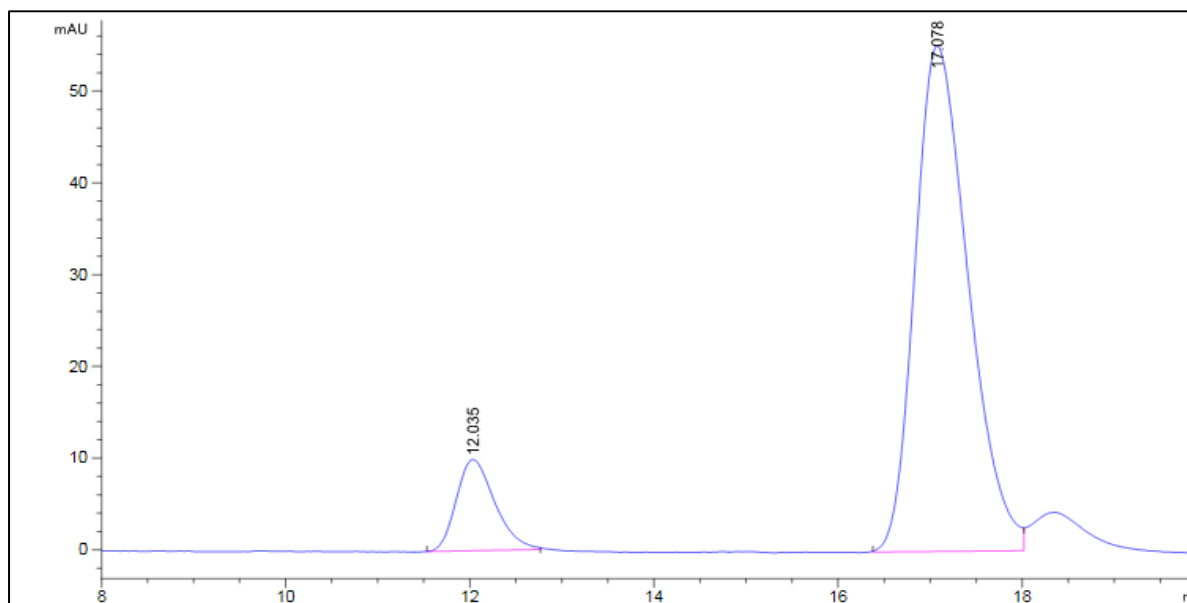

| Entry # | RetTime [min] | Width [min] | Area [mAU*s] | Height [mAU] | Area %  |
|---------|---------------|-------------|--------------|--------------|---------|
| 1       | 12.035        | 0.4281      | 288.15387    | 9.94456      | 11.4914 |
| 2       | 17.078        | 0.6159      | 2219.41528   | 55.10642     | 88.5086 |

HPLC Spectra of 3-(3-methyl-2-(naphthalen-1-yl)benzoyl)oxazolidin-2-one

(3f)

(The top one is racemic, and the bottom one is chiral)

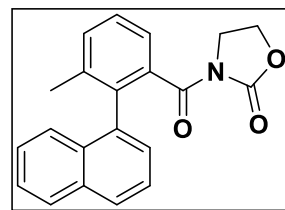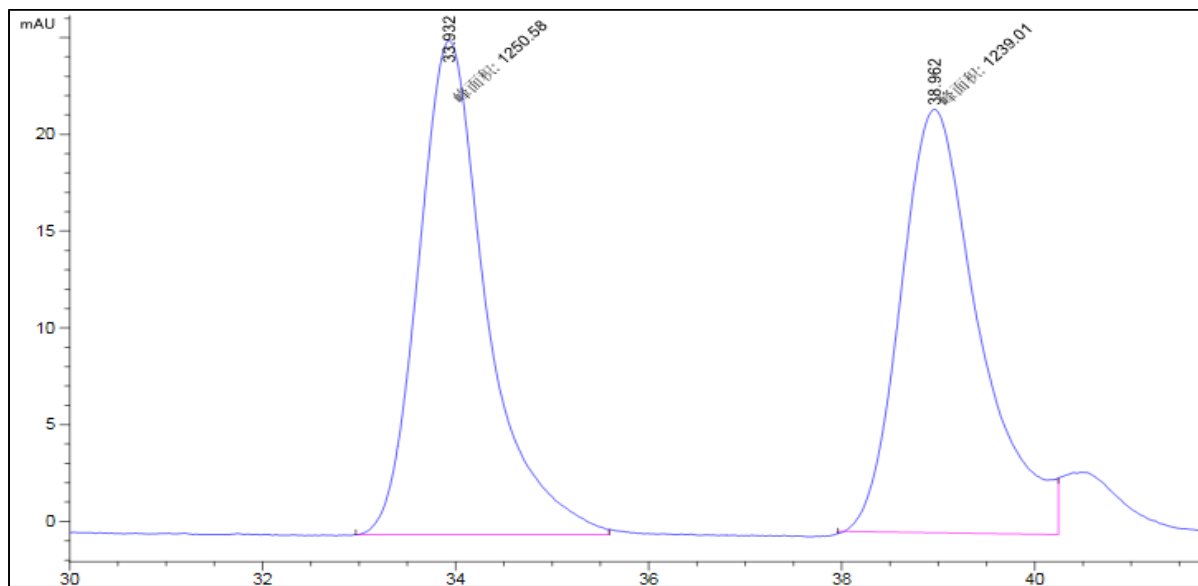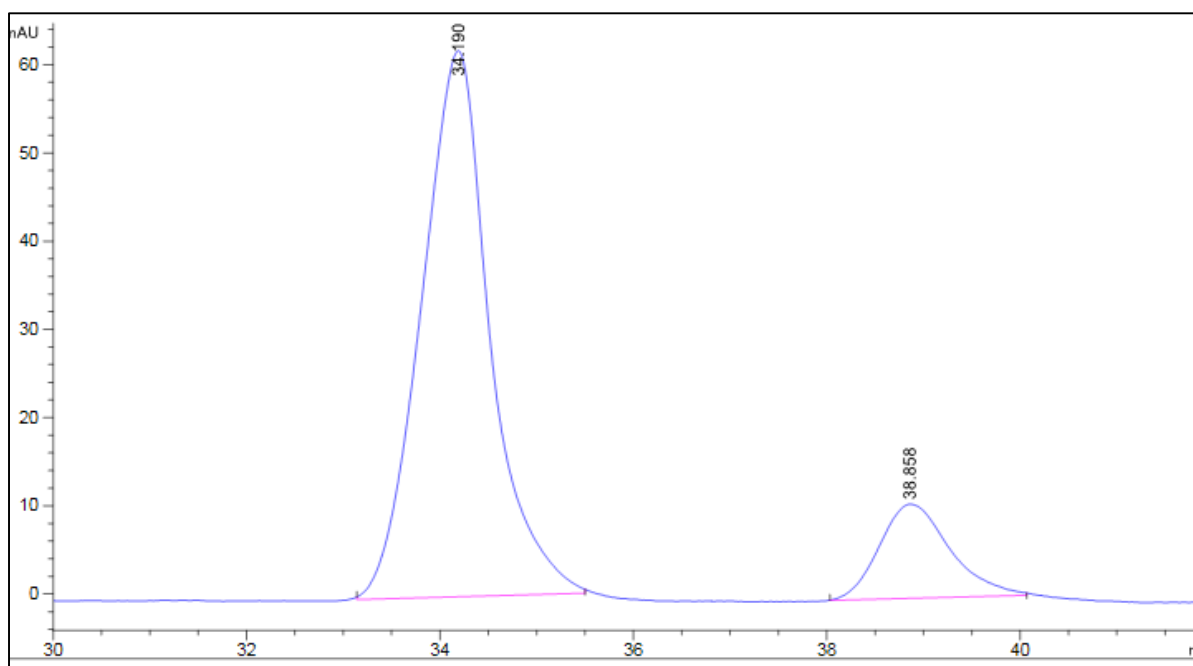

| Entry # | RetTime [min] | Width [min] | Area [mAU*s] | Height [mAU] | Area %  |
|---------|---------------|-------------|--------------|--------------|---------|
| 1       | 34.190        | 0.7179      | 3044.07959   | 61.88698     | 84.9339 |
| 2       | 38.858        | 0.6854      | 539.97894    | 10.65198     | 15.0661 |

HPLC Spectra of 3-methyl-2-(naphthalen-1-yl)-*N*-phenylbenzamide (3g)

(The top one is racemic, and the bottom one is chiral)

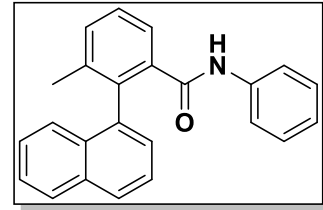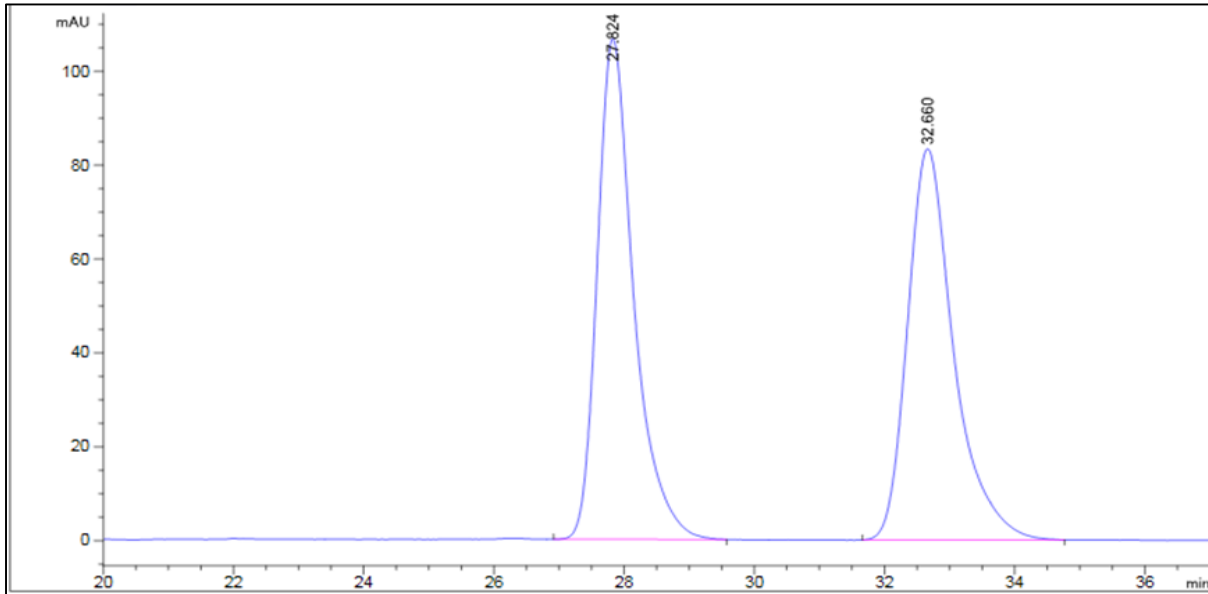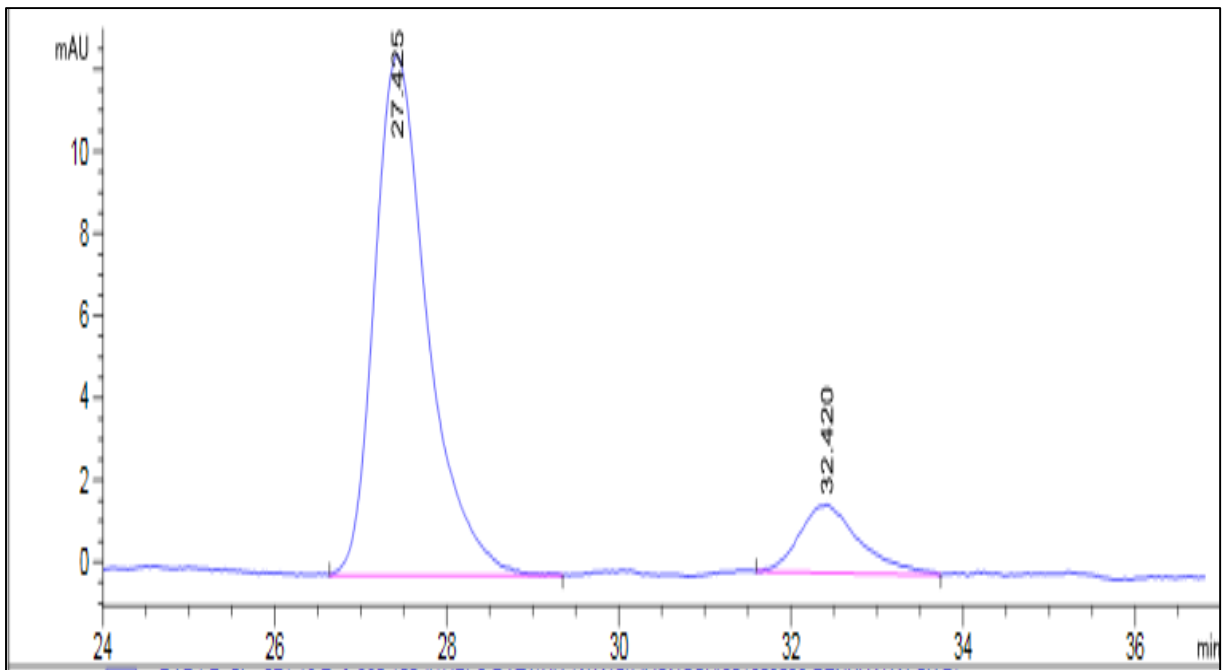

| Entry # | RetTime [min] | Width [min] | Area [mAU*s] | Height [mAU] | Area %  |
|---------|---------------|-------------|--------------|--------------|---------|
| 1       | 27.424        | 0.7032      | 534.64655    | 12.67197     | 88.8682 |
| 2       | 32.416        | 0.7310      | 66.97066     | 1.52693      | 11.1318 |



HPLC Spectra of 3-methyl-2-(naphthalen-1-yl)-*N*-(*o*-tolyl)benzamide (3h)

(The top one is racemic, and the bottom one is chiral)

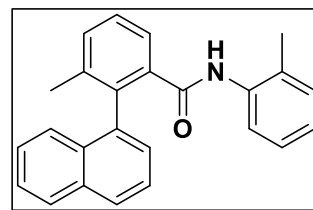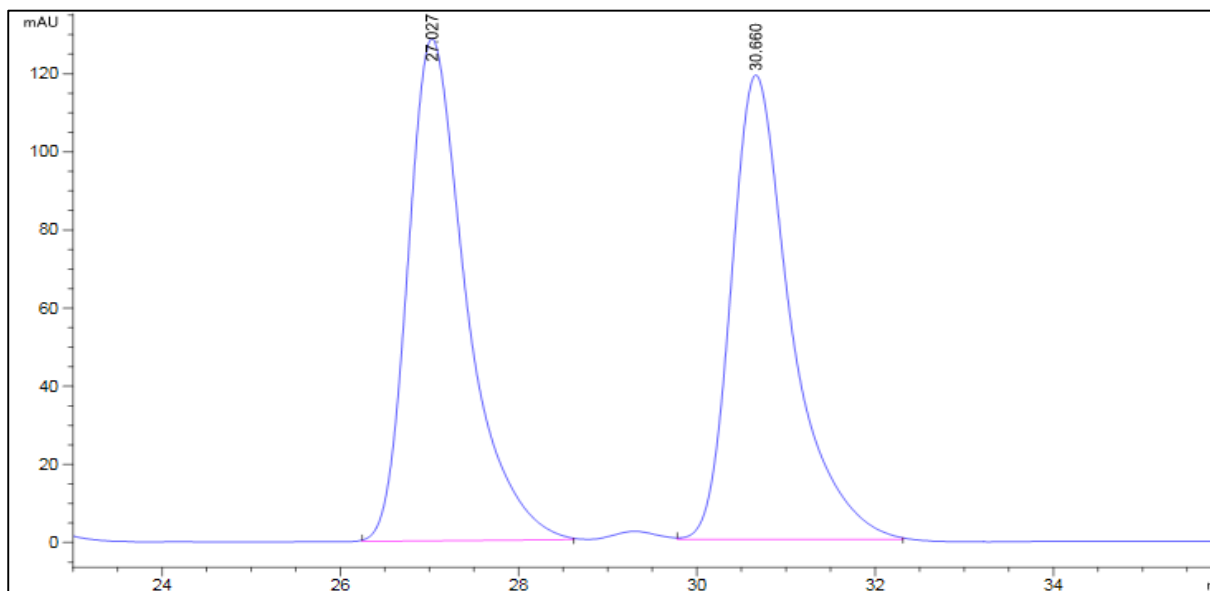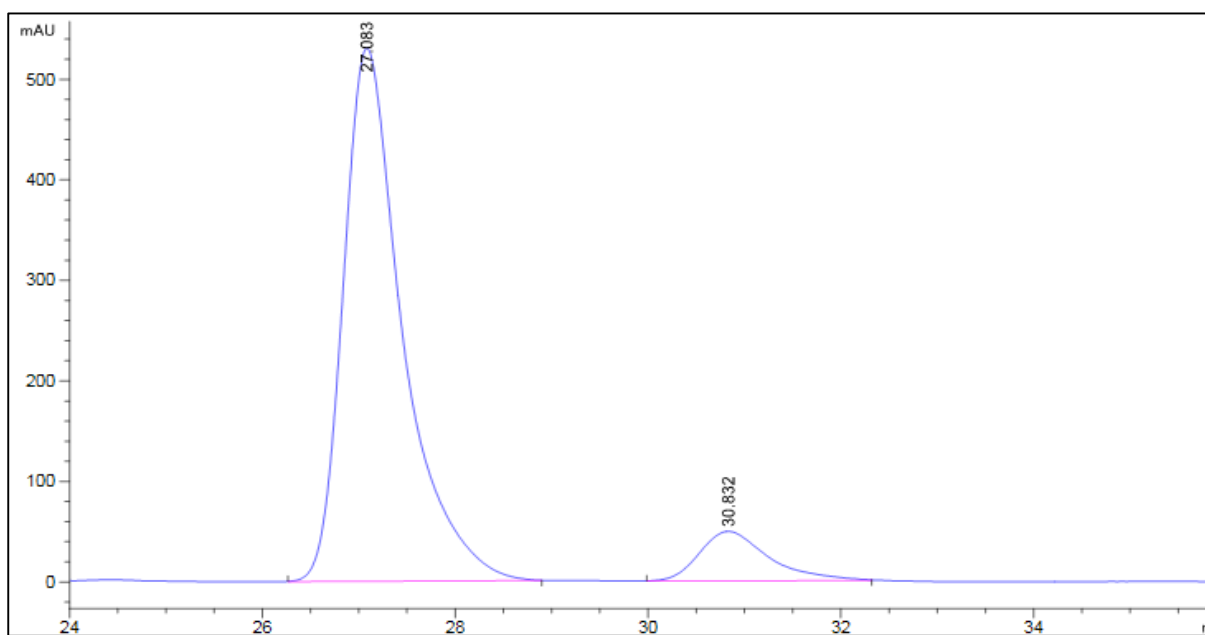

| Entry # | RetTime [min] | Width [min] | Area [mAU*s] | Height [mAU] | Area %  |
|---------|---------------|-------------|--------------|--------------|---------|
| 1       | 27.083        | 0.6354      | 2.261604     | 530.45544    | 90.2187 |
| 2       | 30.832        | 0.7415      | 2451.97192   | 49.19078     | 9.7813  |

### HPLC Spectra of 3-methyl-2-(naphthalen-1-yl)-*N*-(*m*-tolyl)benzamide

(3i)

(The top one is racemic, and the bottom one is chiral)

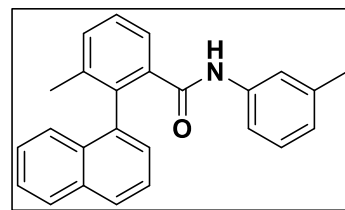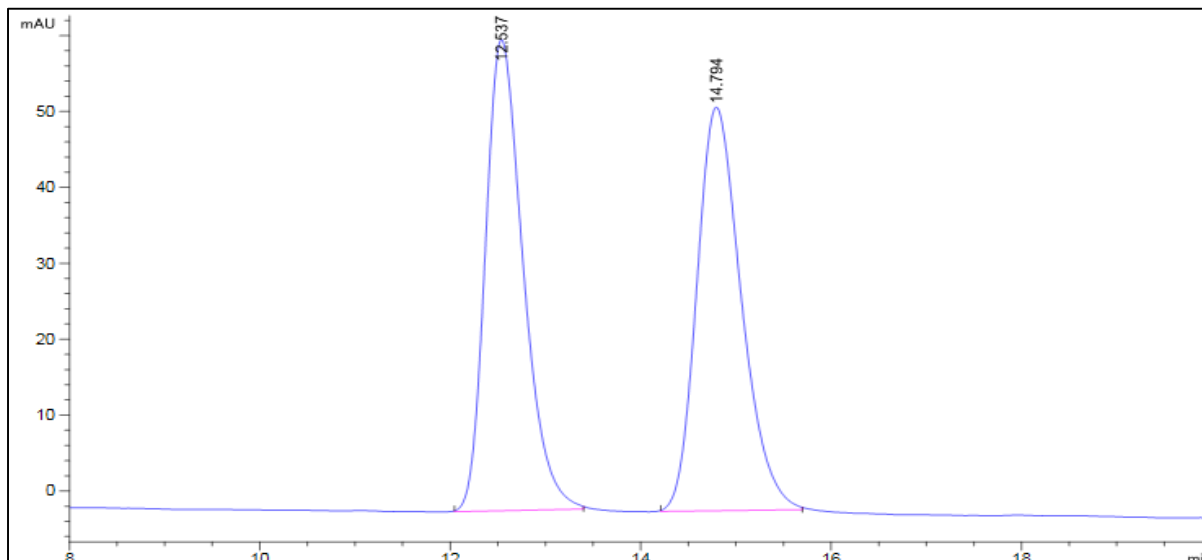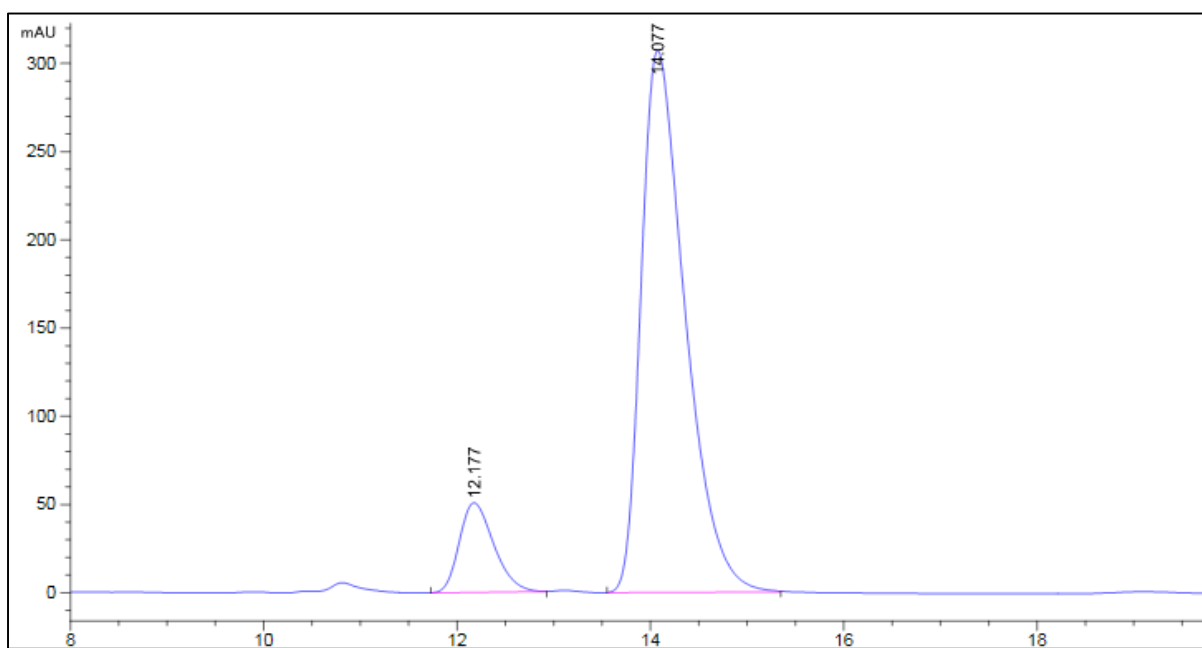

| Entry # | RetTime [min] | Width [min] | Area [mAU*s] | Height [mAU] | Area %  |
|---------|---------------|-------------|--------------|--------------|---------|
| 1       | 12.177        | 0.3825      | 1254.59412   | 50.73551     | 11.4444 |
| 2       | 14.077        | 0.4806      | 9707.88672   | 307.29858    | 88.5556 |

### HPLC Spectra of 3-methyl-2-(naphthalen-1-yl)-N-(*p*-tolyl)benzamide

(3j)

(The top one is racemic, and the bottom one is chiral)

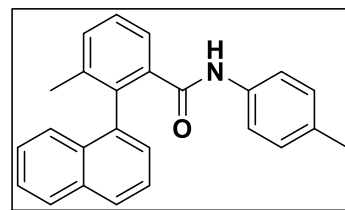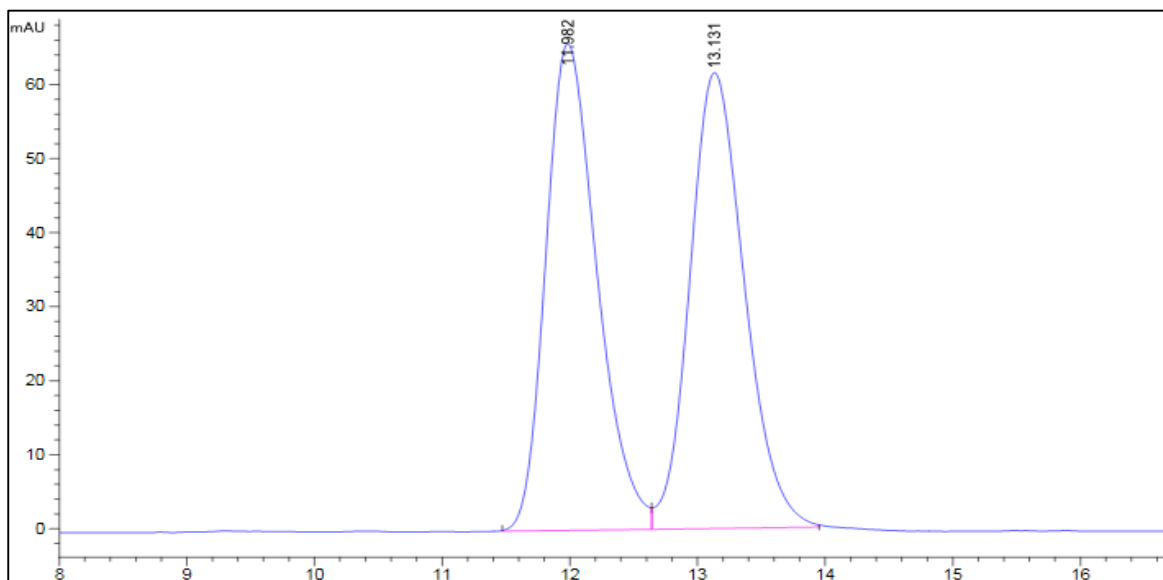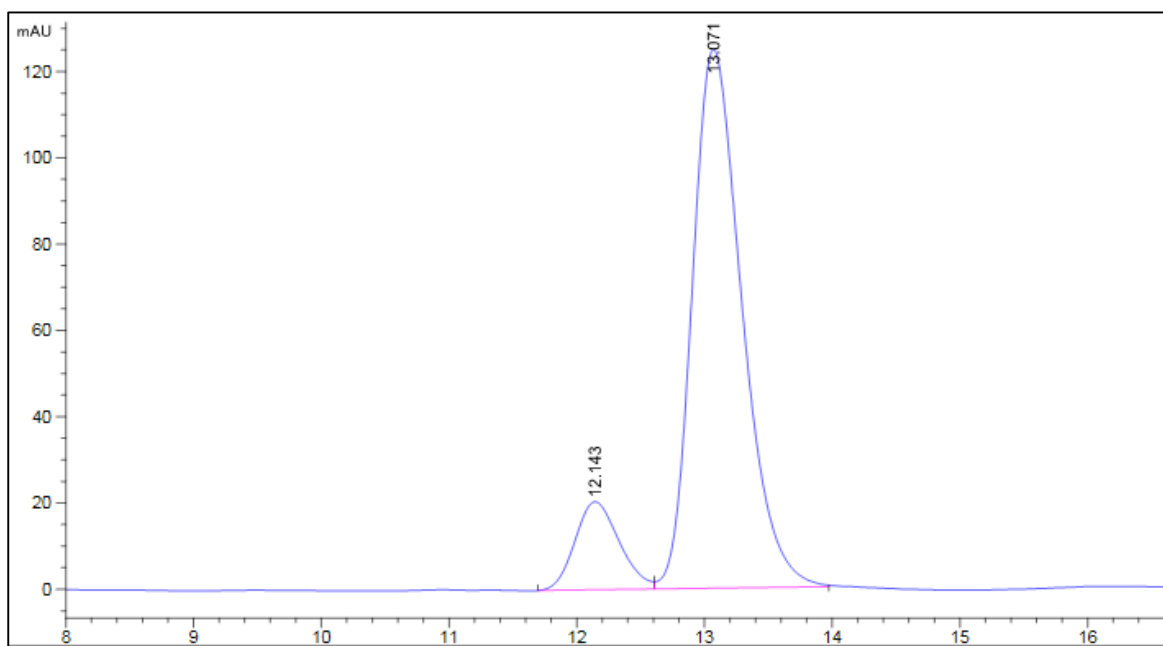

| Entry # | RetTime [min] | Width [min] | Area [mAU*s] | Height [mAU] | Area %  |
|---------|---------------|-------------|--------------|--------------|---------|
| 1       | 12.143        | 0.3743      | 489.74542    | 20.38763     | 12.6879 |
| 2       | 13.071        | 0.4168      | 3370.20068   | 124.92123    | 87.3121 |

HPLC Spectra of 3-methyl-2-(naphthalen-1-yl)-*N*-(2-(trifluoromethyl)phenyl)benzamide (3k)

(The top one is racemic, and the bottom one is chiral)

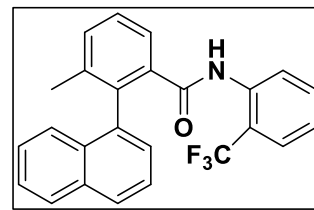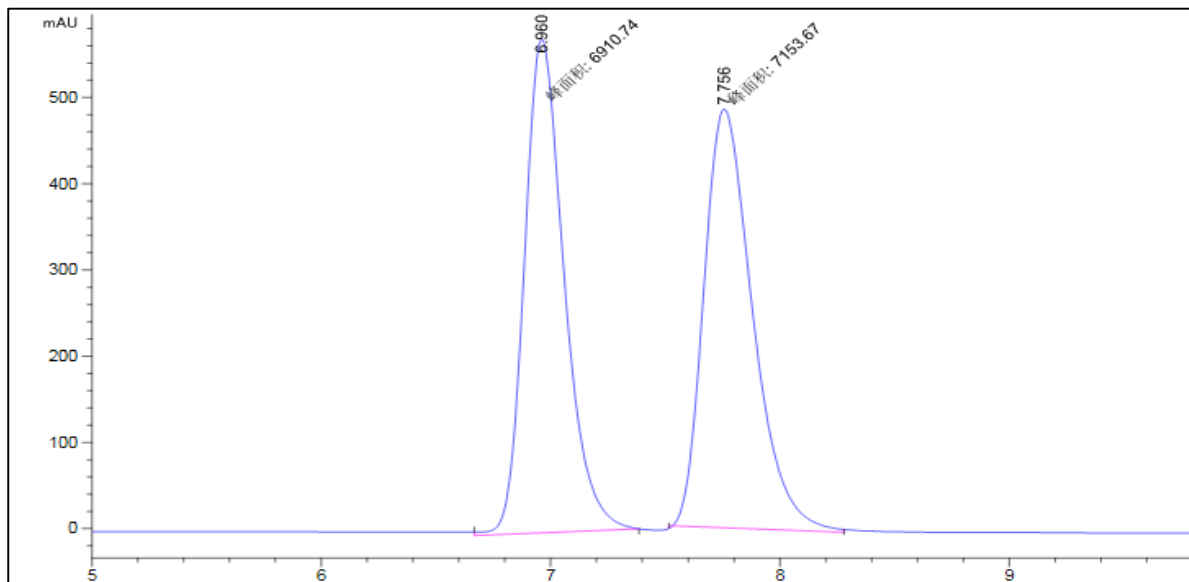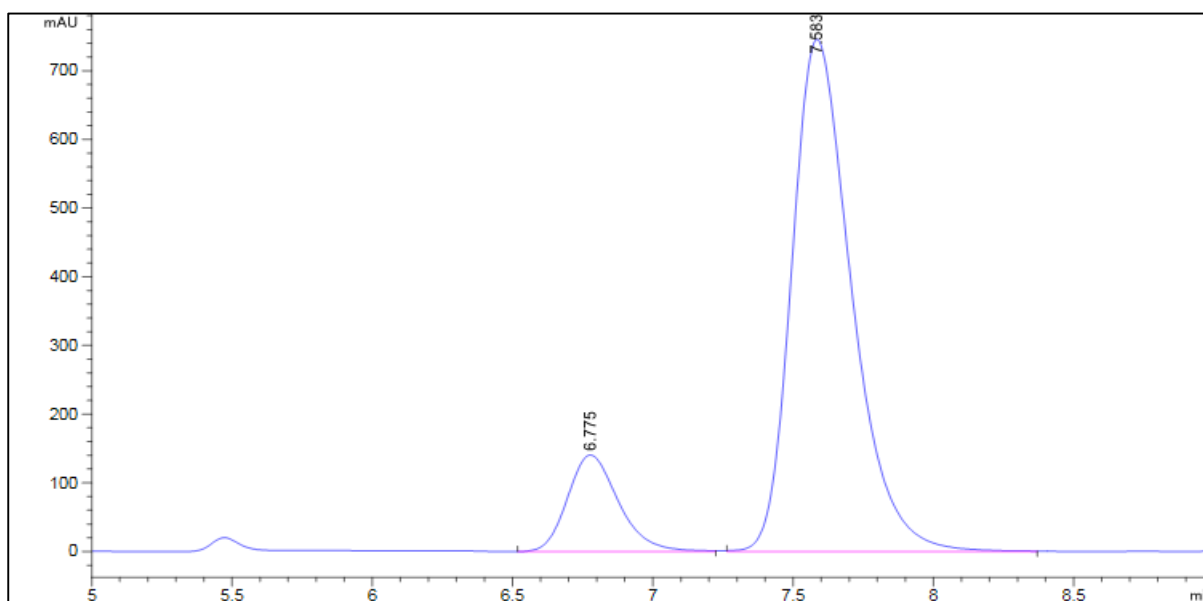

| Entry # | RetTime [min] | Width [min] | Area [mAU*s] | Height [mAU] | Area %  |
|---------|---------------|-------------|--------------|--------------|---------|
| 1       | 6.775         | 0.1954      | 1775.48633   | 140.49475    | 13.8597 |
| 2       | 7.583         | 0.2266      | 1.103494     | 745.82605    | 86.1403 |

HPLC Spectra of 3-methyl-2-(naphthalen-1-yl)-N-(3-(trifluoromethyl)phenyl)benzamide (3l)

(The top one is racemic, and the bottom one is chiral)

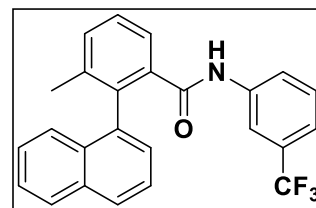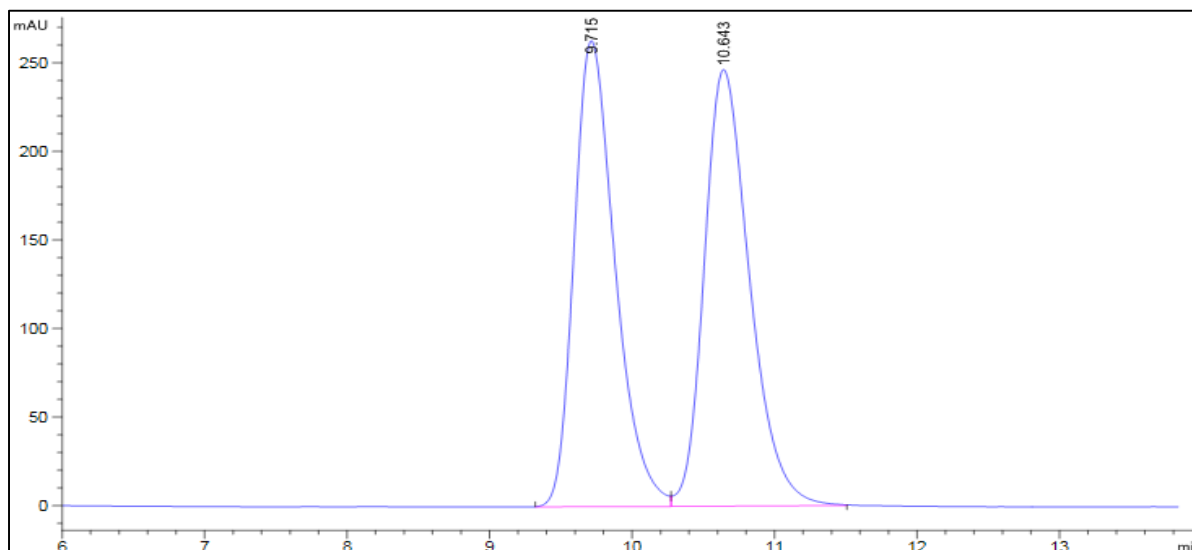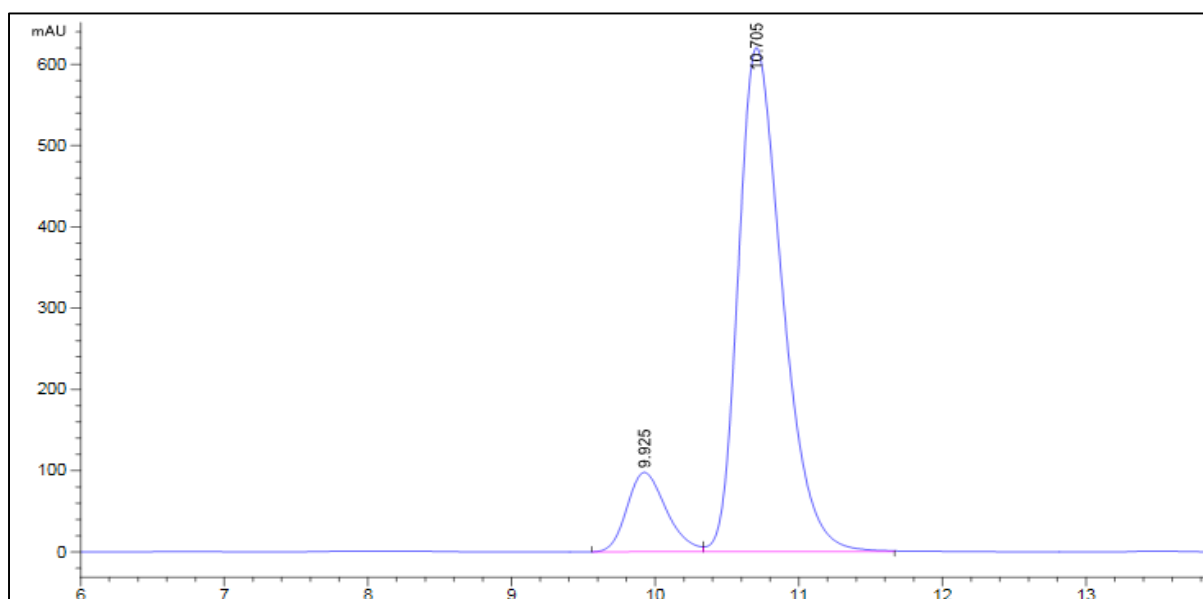

| Entry # | RetTime [min] | Width [min] | Area [mAU*s] | Height [mAU] | Area %  |
|---------|---------------|-------------|--------------|--------------|---------|
| 1       | 9.925         | 0.2932      | 1850.31958   | 97.59919     | 12.3212 |
| 2       | 10.705        | 0.3238      | 1.31670e4    | 619.93048    | 87.6788 |

HPLC Spectra of 3-methyl-2-(naphthalen-1-yl)-N-(4-(trifluoromethyl)phenyl)benzamide (3m)

(The top one is racemic, and the bottom one is chiral)

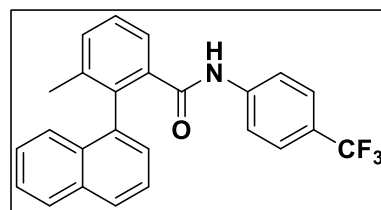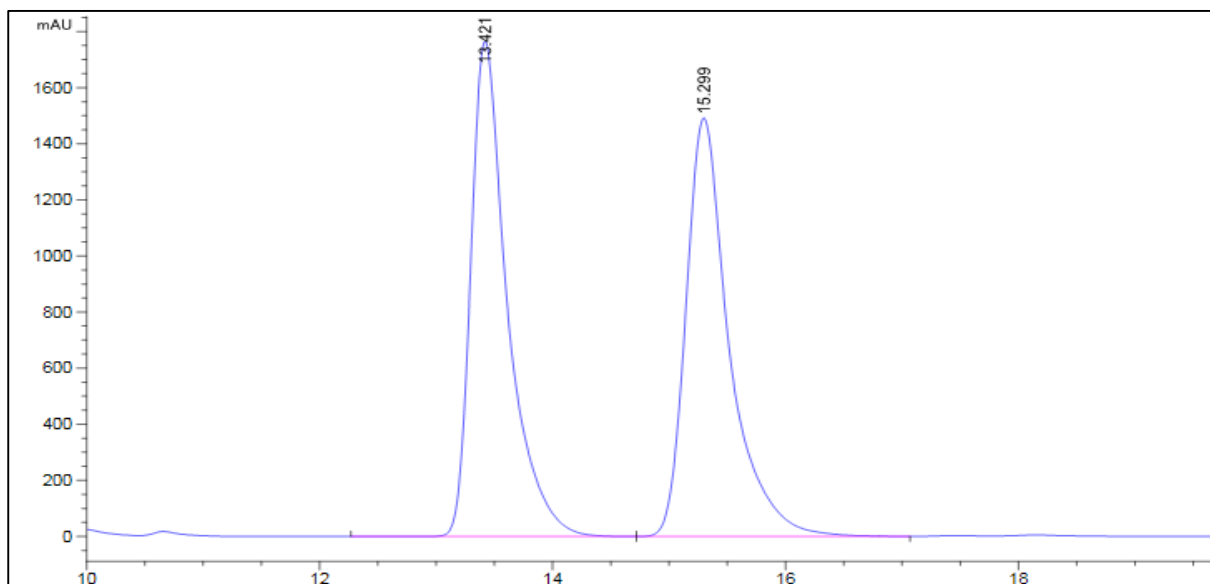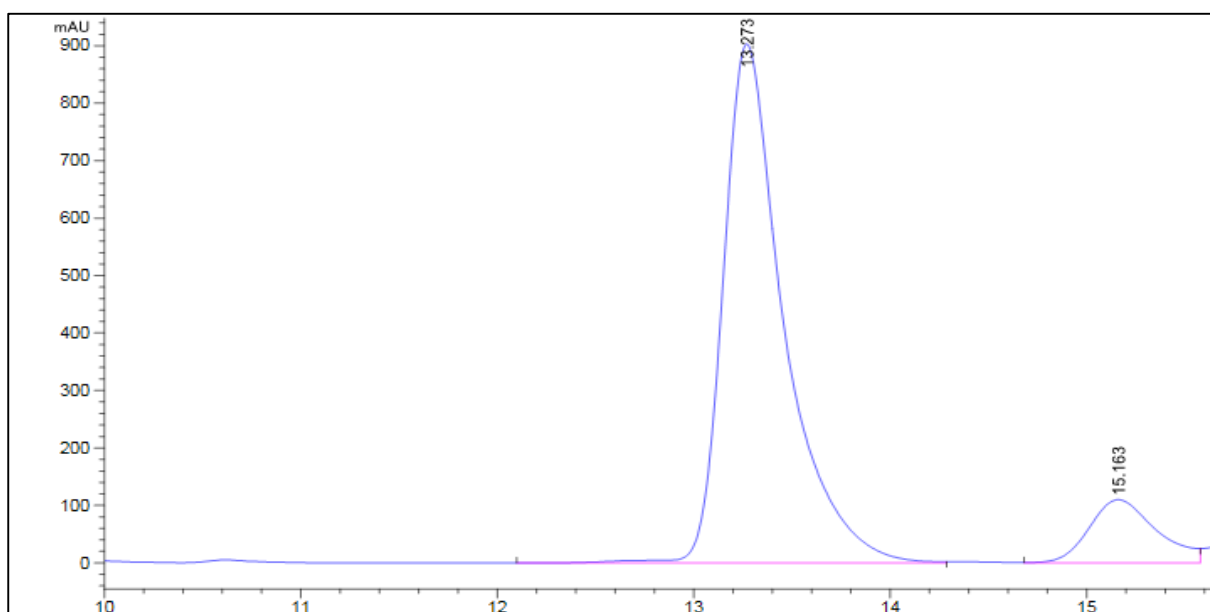

| Entry # | RetTime [min] | Width [min] | Area [mAU*s] | Height [mAU] | Area %  |
|---------|---------------|-------------|--------------|--------------|---------|
| 1       | 13.273        | 0.3141      | 1.935414     | 902.77246    | 88.1106 |
| 2       | 15.163        | 0.3571      | 2611.59253   | 109.95181    | 11.8894 |

HPLC Spectra of *N*-(3,5-bis(trifluoromethyl)phenyl)-3-methyl-2-(naphthalen-1-yl)benzamide (3n)

(The top one is racemic, and the bottom one is chiral)

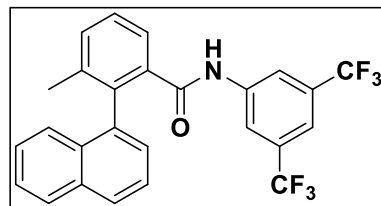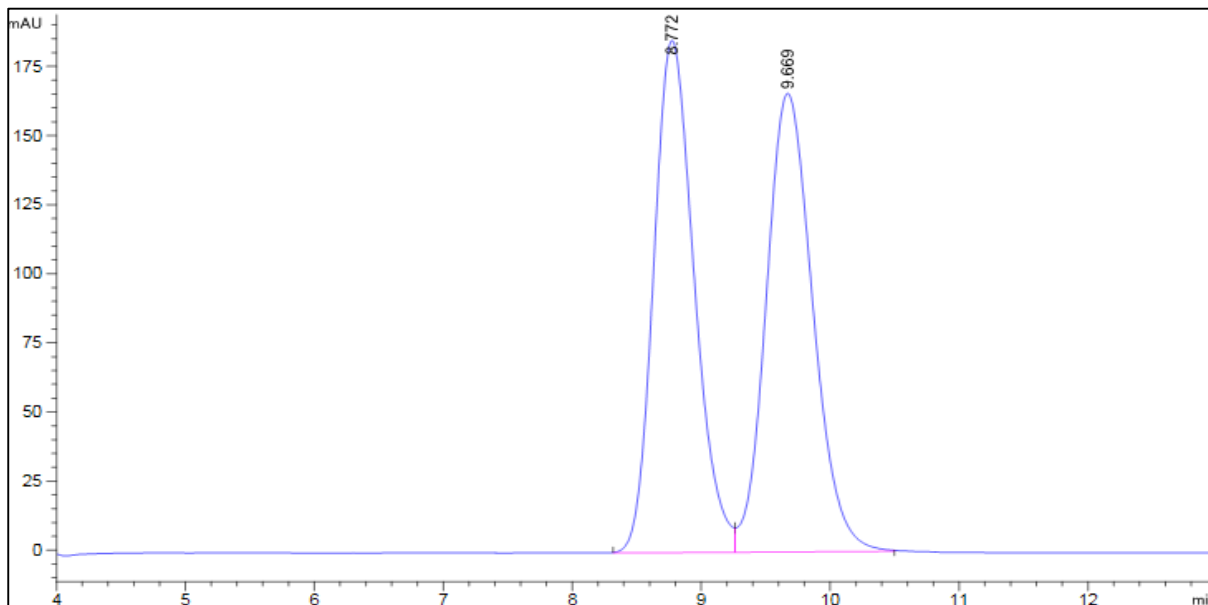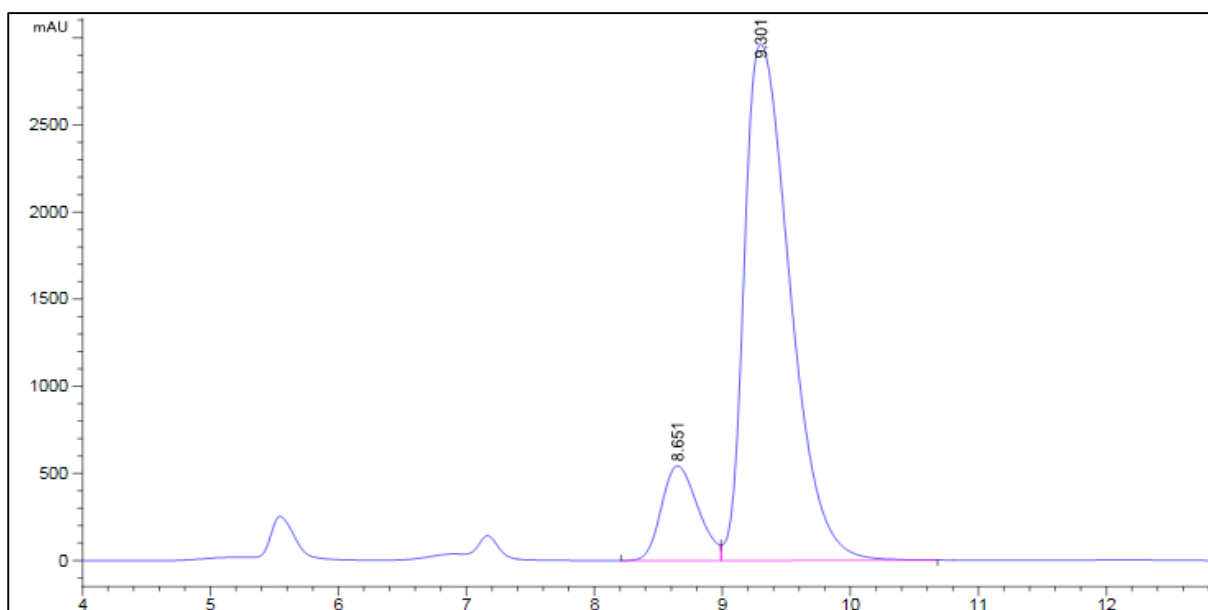

| Entry # | RetTime [min] | Width [min] | Area [mAU*s] | Height [mAU] | Area %  |
|---------|---------------|-------------|--------------|--------------|---------|
| 1       | 8.651         | 0.3095      | 1.077214     | 542.77826    | 12.7904 |
| 2       | 9.301         | 0.3852      | 7.34478e     | 2962.53540   | 87.2096 |

HPLC Spectra of ethyl 4-(3-methyl-2-(naphthalen-1-yl)benzamido)benzoate (3o)

(The top one is racemic, and the bottom one is chiral)

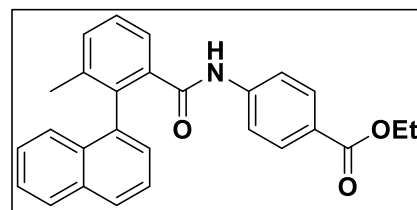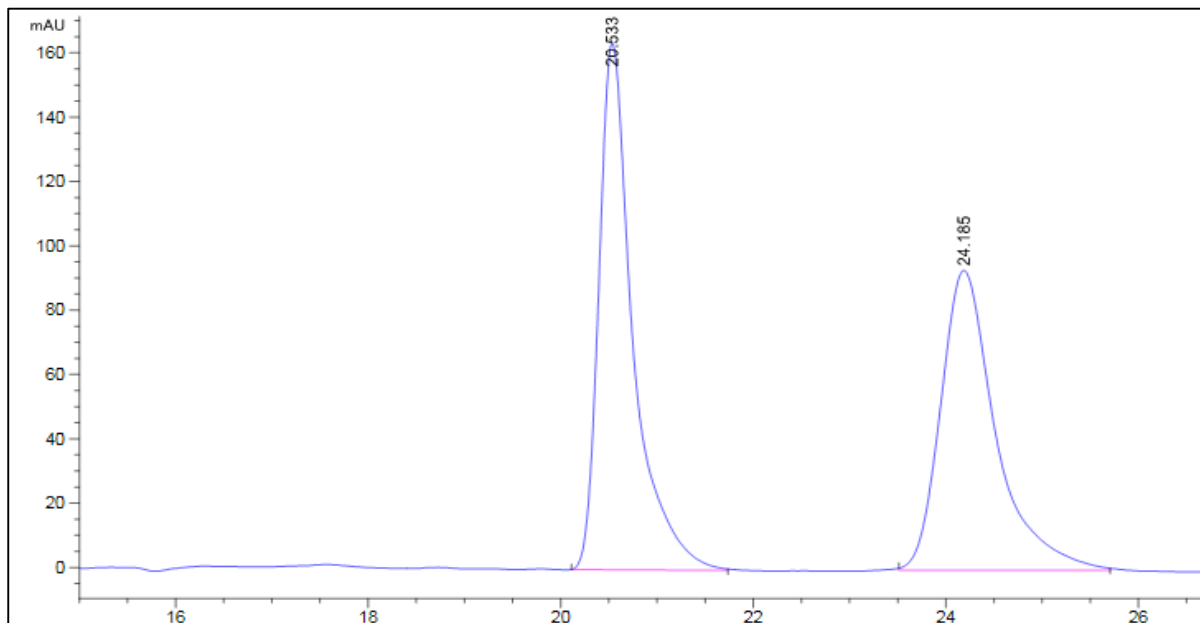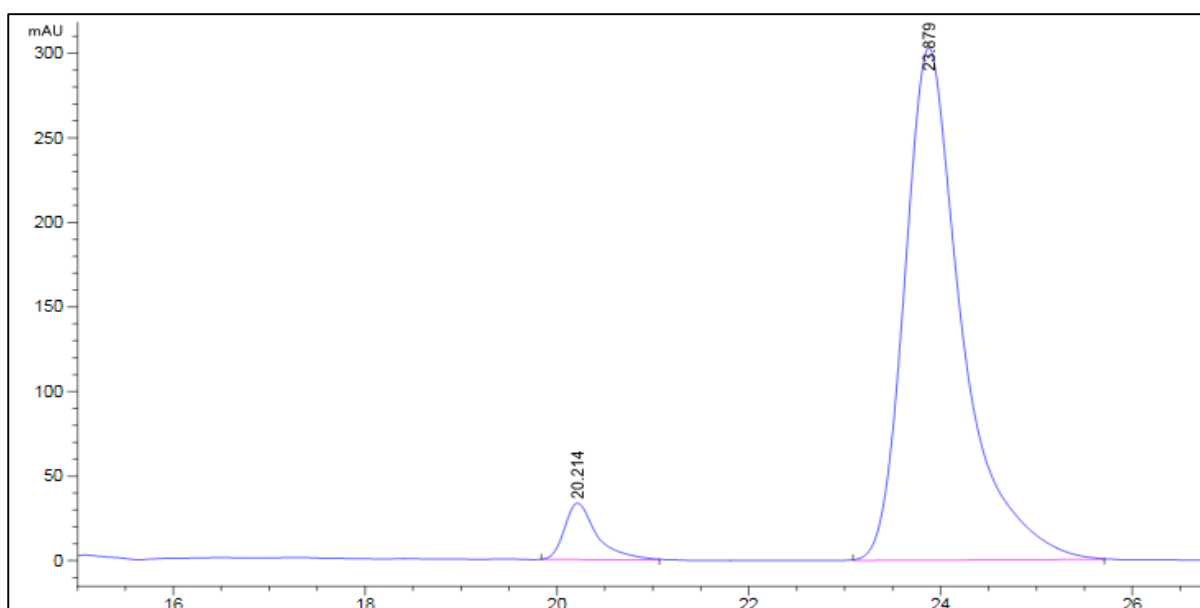

| Entry # | RetTime [min] | Width [min] | Area [mAU*s] | Height [mAU] | Area %  |
|---------|---------------|-------------|--------------|--------------|---------|
| 1       | 20.214        | 0.3471      | 779.74506    | 33.31474     | 5.8500  |
| 2       | 23.879        | 0.6114      | 1.25493e4    | 302.87259    | 94.1500 |



HPLC Spectra of 3-methyl-2-(4-methylnaphthalen-1-yl)-*N*-phenylbenzamide (3p)

(The top one is racemic, and the bottom one is chiral)

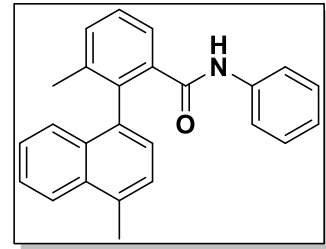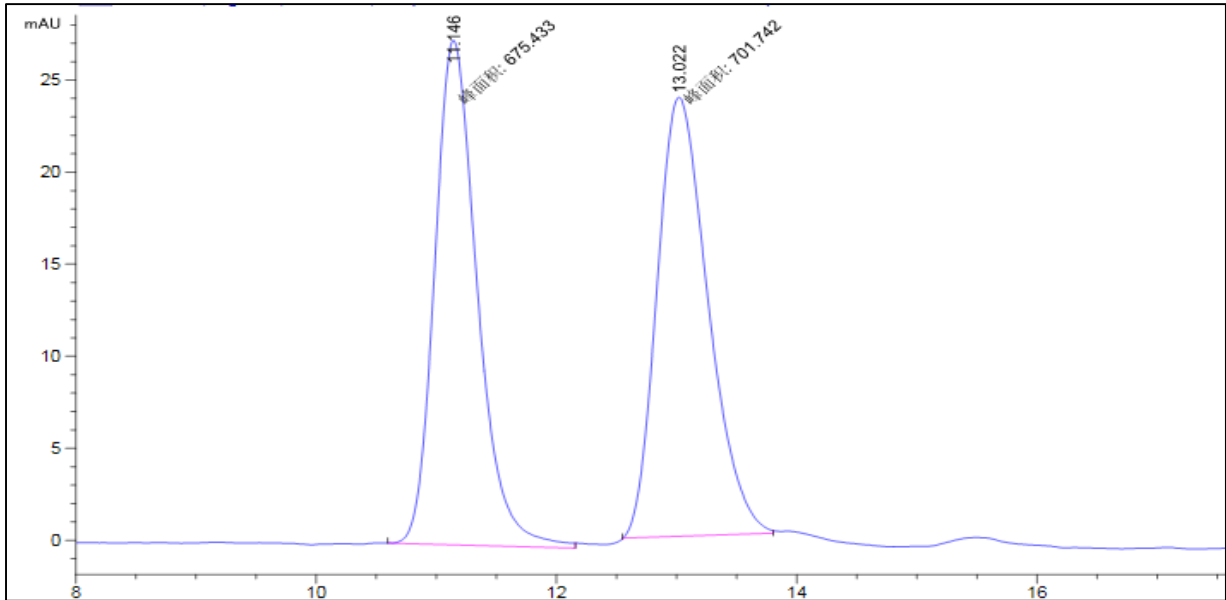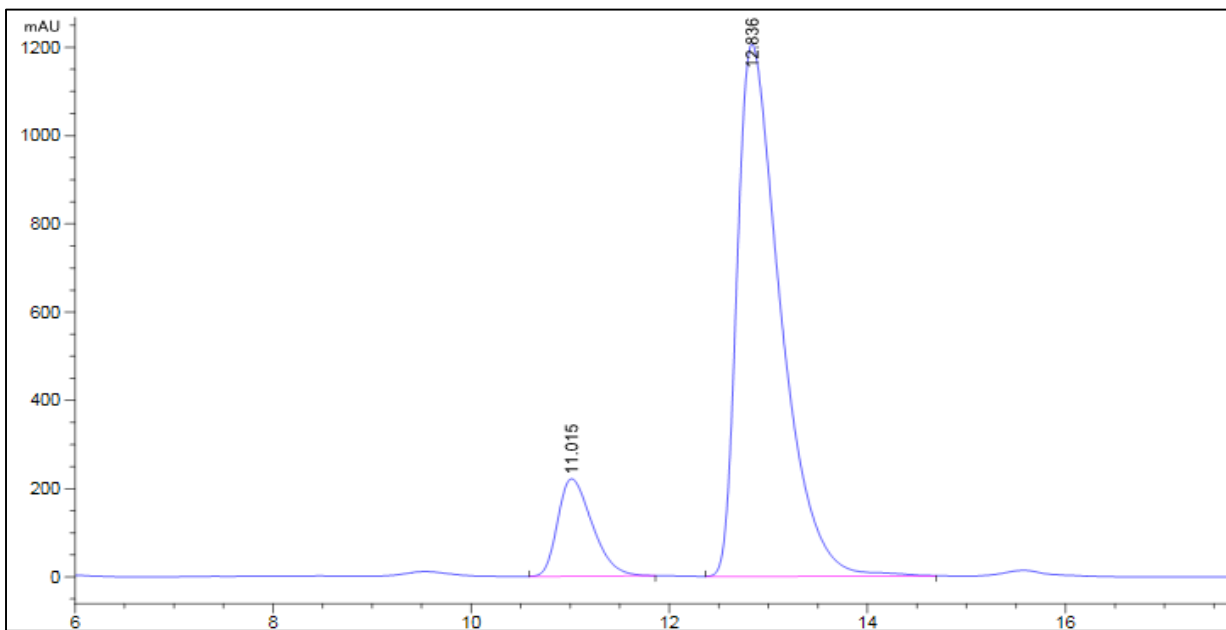

| Entry # | RetTime [min] | Width [min] | Area [mAU*s] | Height [mAU] | Area %  |
|---------|---------------|-------------|--------------|--------------|---------|
| 1       | 11.015        | 0.3730      | 5353.32275   | 220.65773    | 12.7540 |
| 2       | 12.836        | 0.4582      | 3.662024     | 1206.12109   | 87.2460 |

**HPLC Spectra of 4-methoxy-*N*-phenyl-1-(*o*-tolyl)-2-naphthamide (3q)**  
 (The top one is racemic, and the bottom one is chiral)

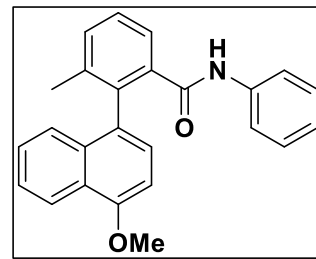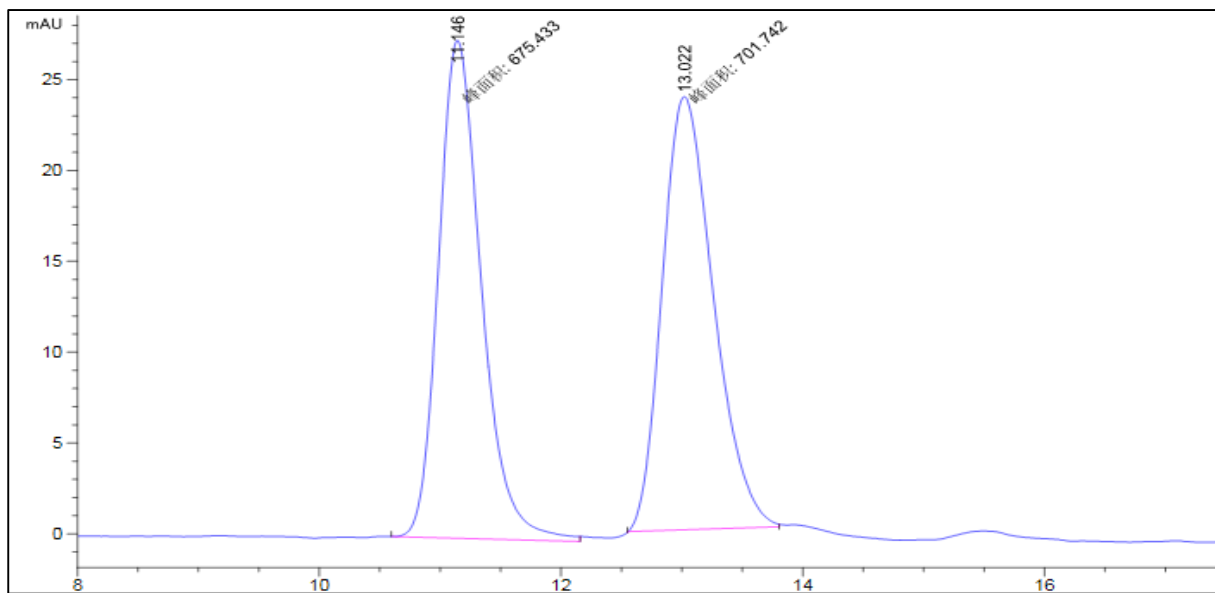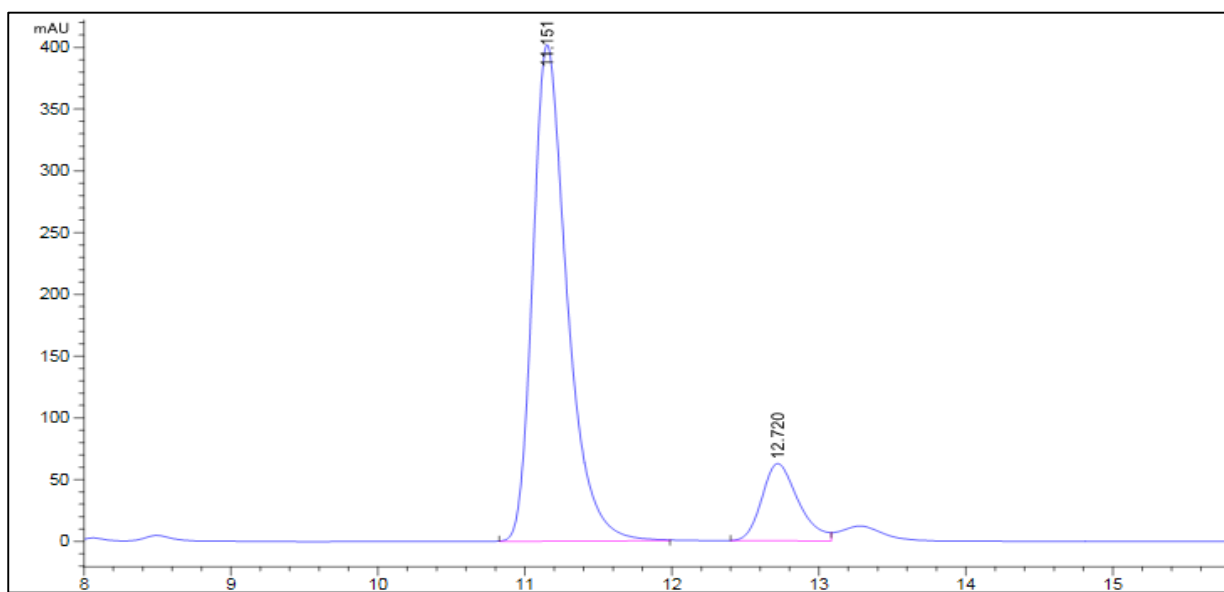

| Entry # | RetTime [min] | Width [min] | Area [mAU*s] | Height [mAU] | Area %  |
|---------|---------------|-------------|--------------|--------------|---------|
| 1       | 11.151        | 0.2449      | 6510.06934   | 402.02893    | 85.7853 |
| 2       | 12.720        | 0.2634      | 1078.72424   | 62.47613     | 14.2147 |

HPLC Spectra of 2-(4-(benzyloxy)naphthalen-1-yl)-3-methyl-N-phenylbenzamide (3r)

(The top one is racemic, and the bottom one is chiral)

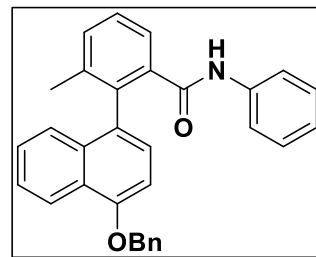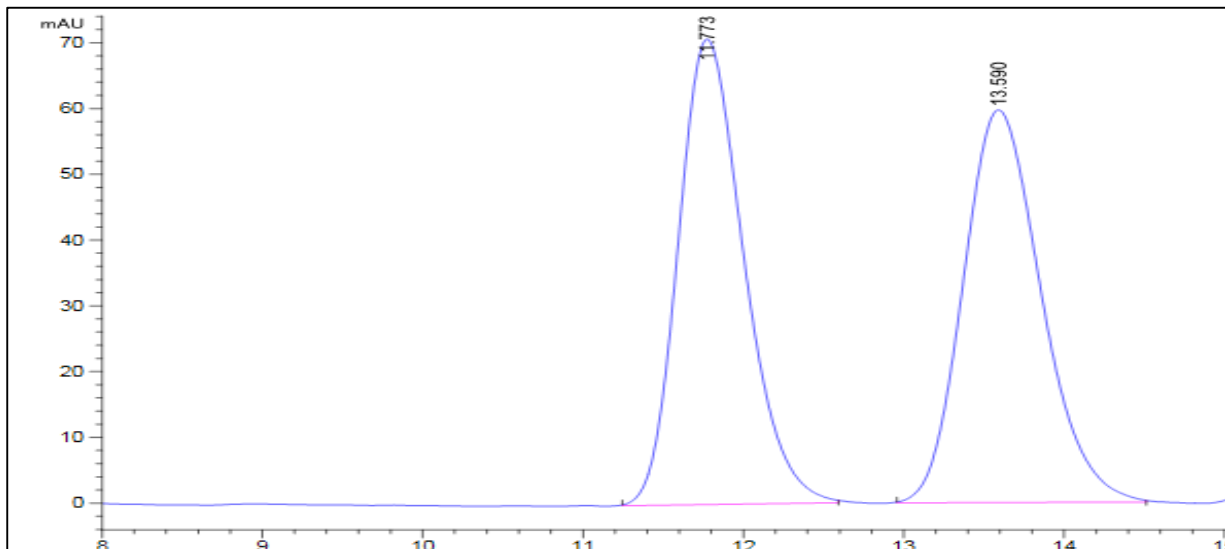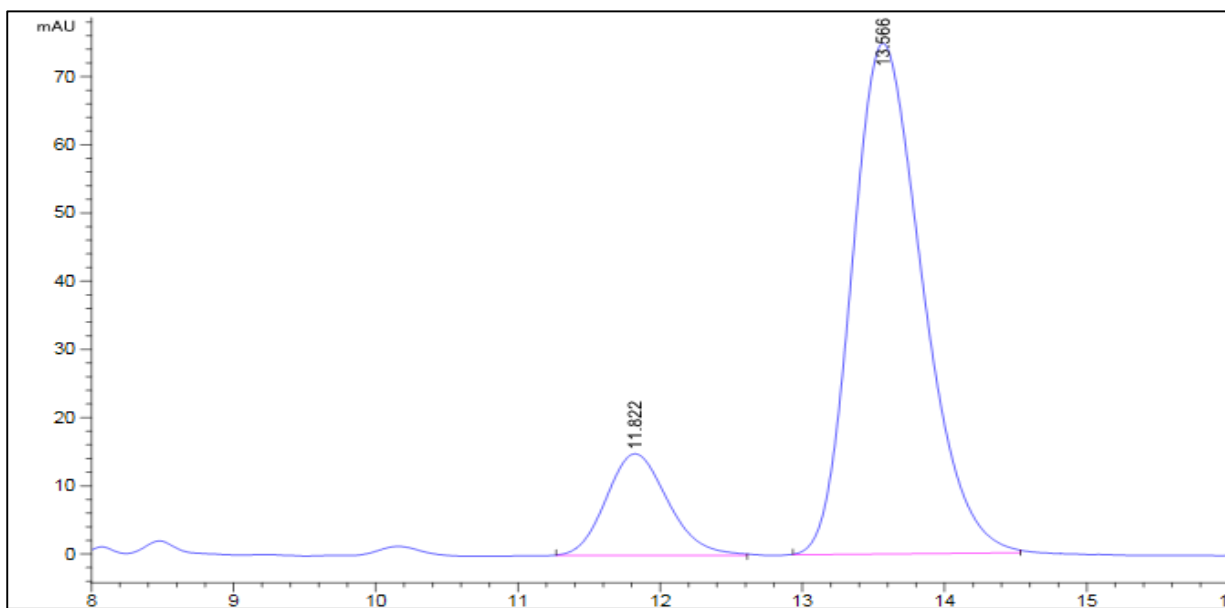

| Entry # | RetTime [min] | Width [min] | Area [mAU*s] | Height [mAU] | Area %  |
|---------|---------------|-------------|--------------|--------------|---------|
| 1       | 11.822        | 0.4706      | 450.67667    | 14.91067     | 14.9458 |
| 2       | 13.566        | 0.5336      | 2564.73096   | 74.88159     | 85.0542 |

### HPLC Spectra of *N*-isopropyl-3-methyl-2-(naphthalen-1-yl)aniline (5b)

(The top one is racemic, and the bottom one is chiral)

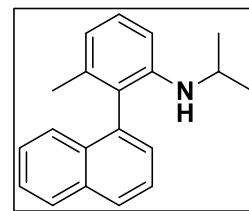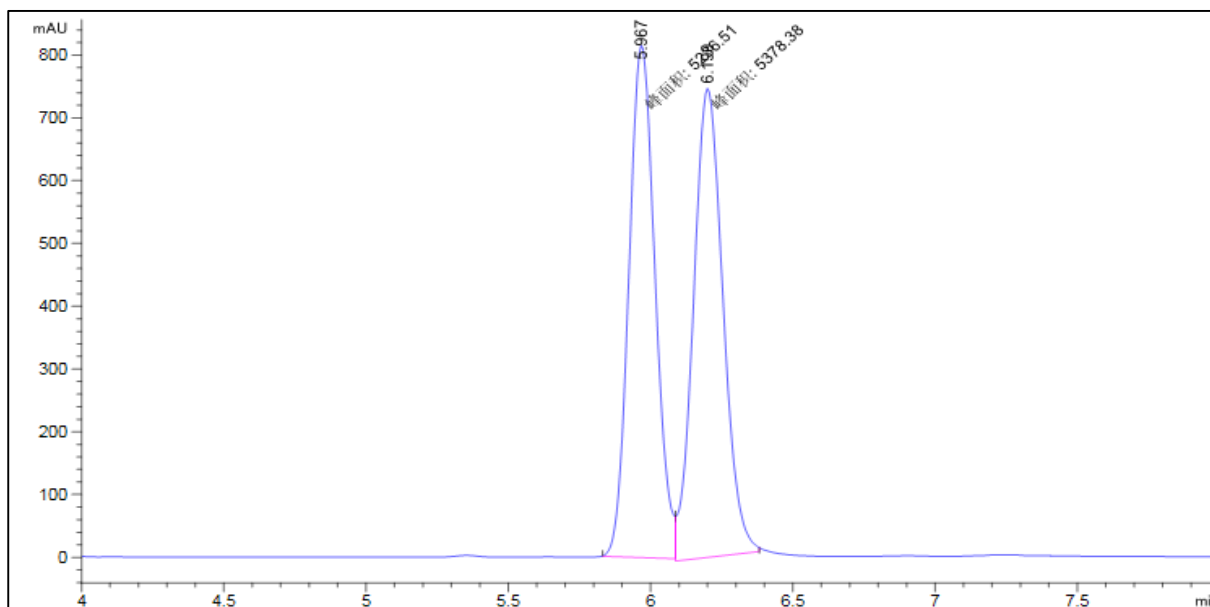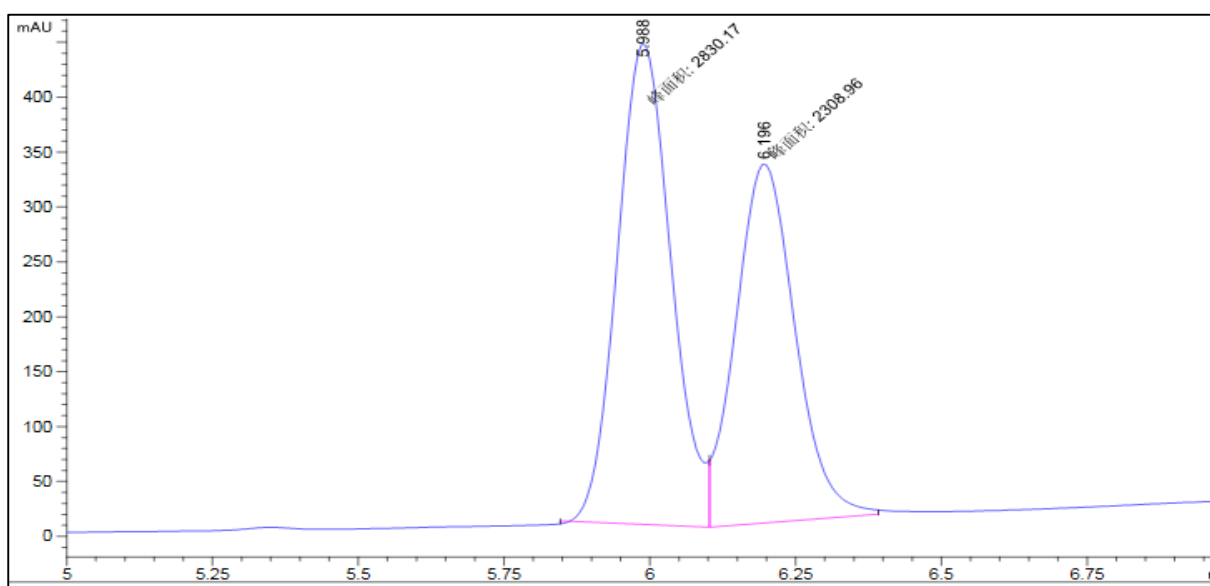

| Entry # | RetTime [min] | Width [min] | Area [mAU*s] | Height [mAU] | Area %  |
|---------|---------------|-------------|--------------|--------------|---------|
| 1       | 5.988         | 0.1075      | 2830.17041   | 438.96976    | 55.0710 |
| 2       | 6.196         | 0.1174      | 2308.96436   | 327.85175    | 44.9290 |

### HPLC Spectra of *N*-benzyl-3-methyl-2-(naphthalen-1-yl)aniline (5c)

(The top one is racemic, and the bottom one is chiral)

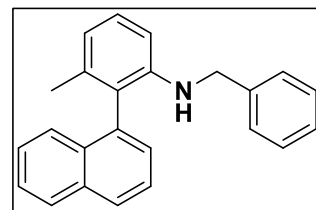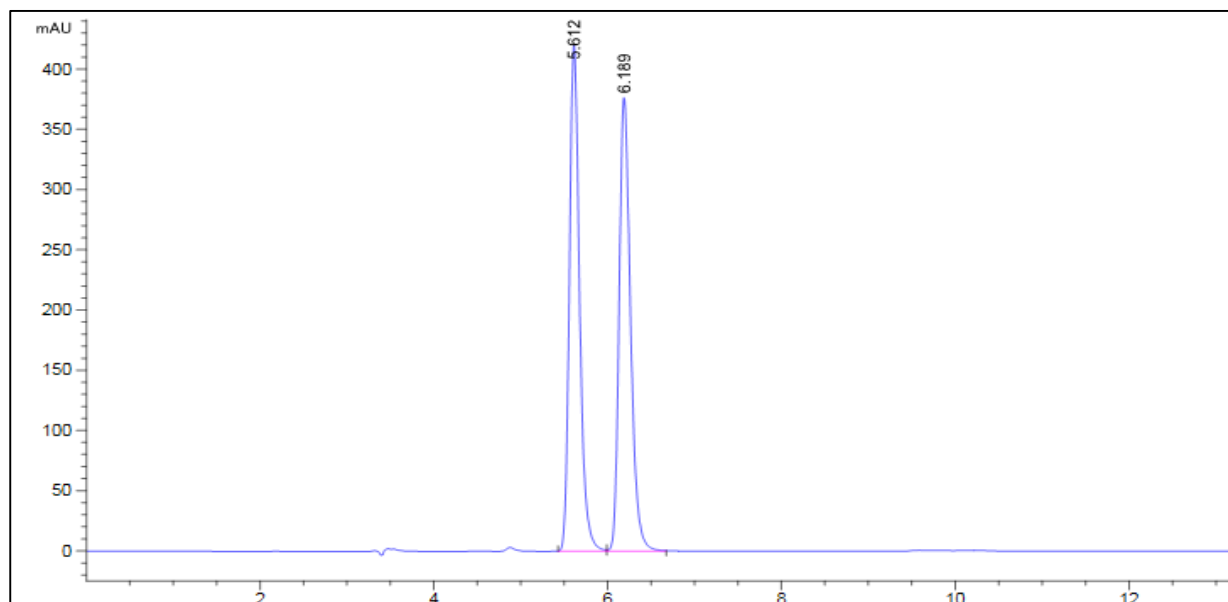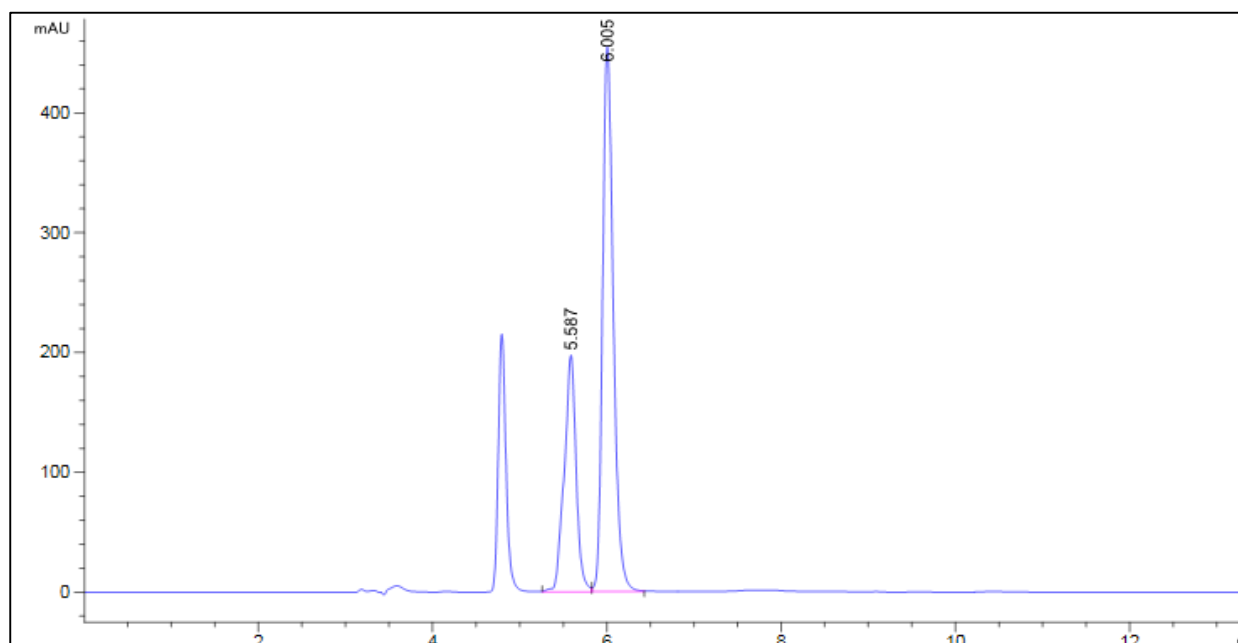

| Entry # | RetTime [min] | Width [min] | Area [mAU*s] | Height [mAU] | Area %  |
|---------|---------------|-------------|--------------|--------------|---------|
| 1       | 5.587         | 0.1368      | 1878.45886   | 197.77565    | 32.4563 |
| 2       | 6.005         | 0.1321      | 3909.20239   | 455.41733    | 67.5437 |

**HPLC Spectra of *N*-(3-methyl-2-(naphthalen-1-yl)phenyl)benzamide (5d)**  
 (The top one is racemic, and the bottom one is chiral)

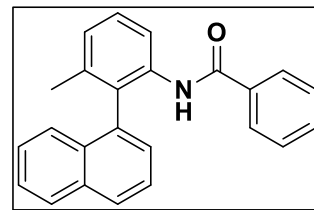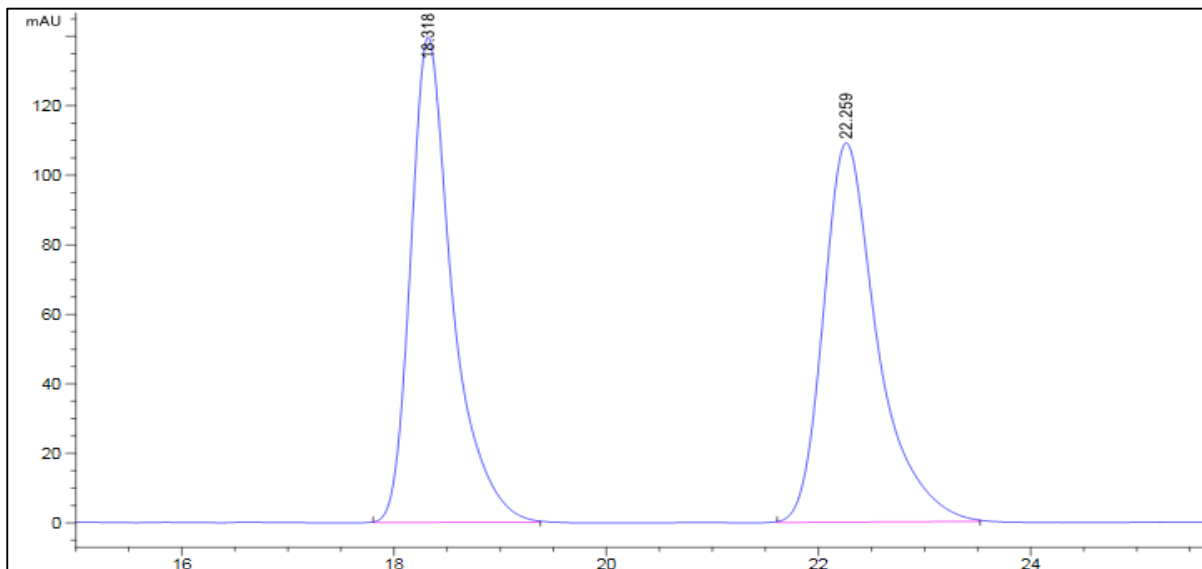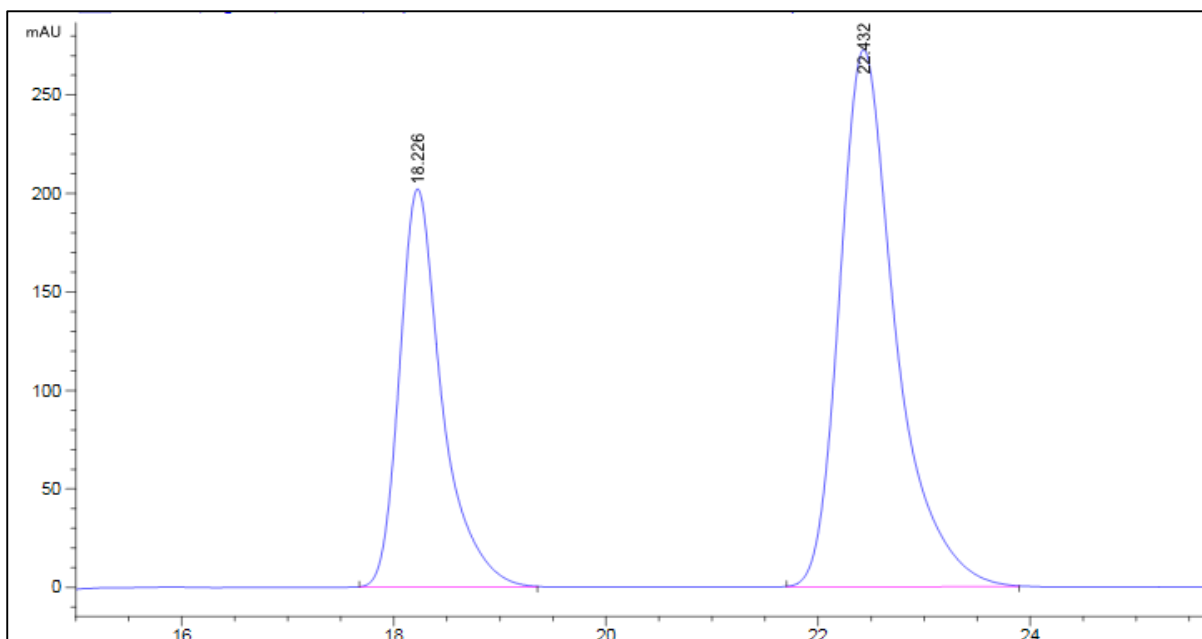

| Entry # | RetTime [min] | Width [min] | Area [mAU*s] | Height [mAU] | Area %  |
|---------|---------------|-------------|--------------|--------------|---------|
| 1       | 18.226        | 0.4180      | 5650.18506   | 202.18347    | 36.0583 |
| 2       | 22.432        | 0.5526      | 1.00194e4    | 272.70181    | 63.9417 |

### HPLC Spectra of methyl 3-methyl-2-(naphthalen-1-yl)benzoate (5e)

(The top one is racemic, and the bottom one is chiral)

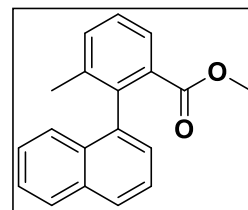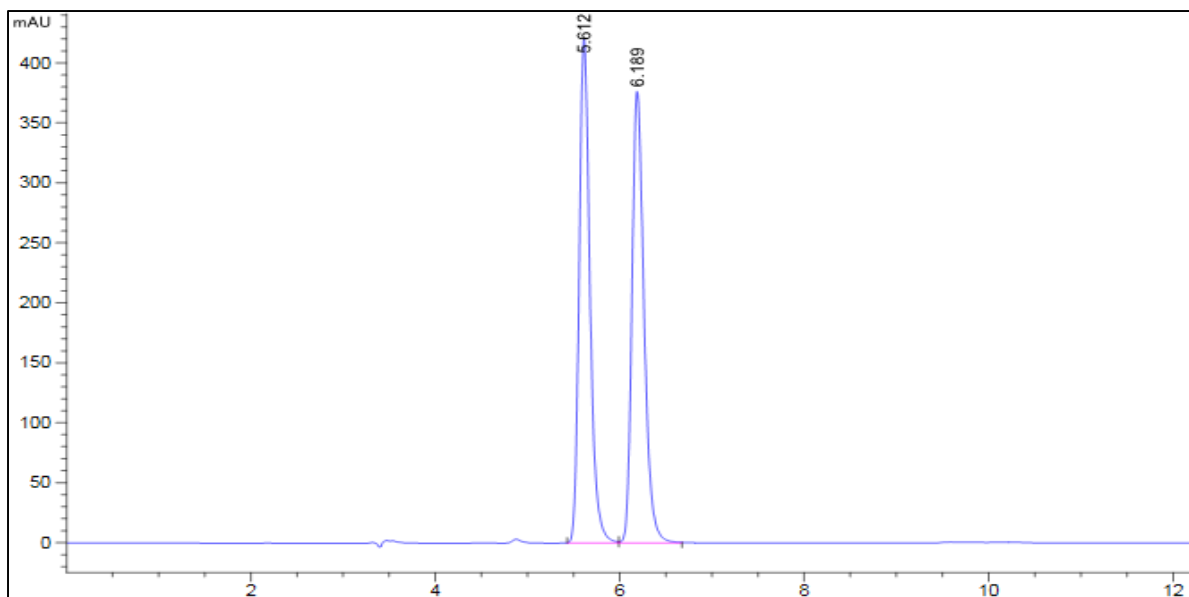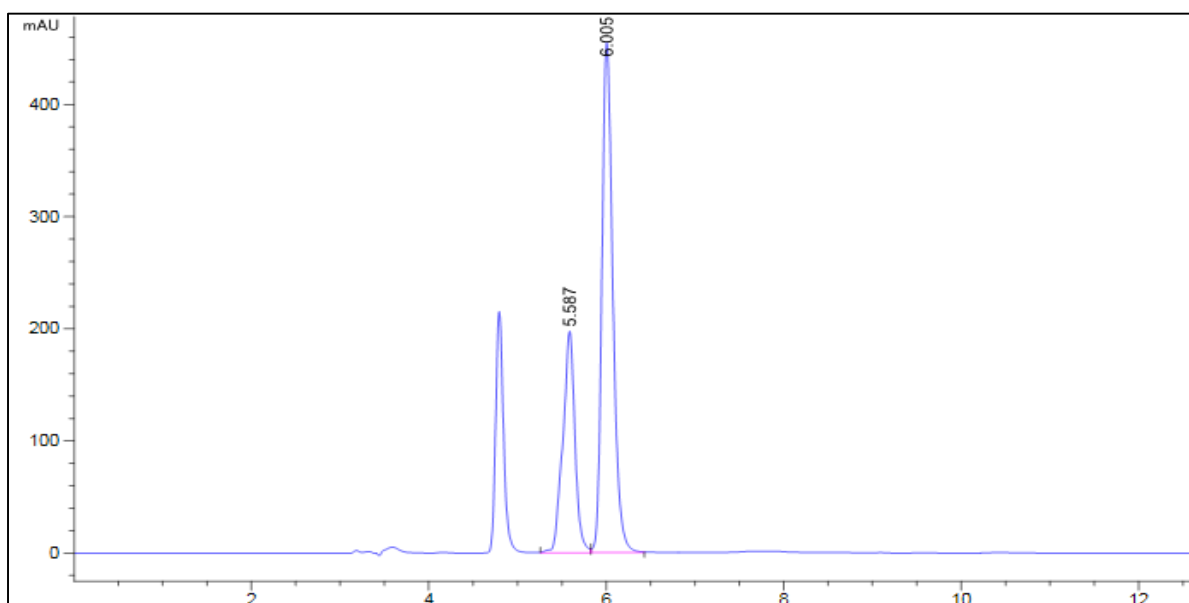

| Entry # | RetTime [min] | Width [min] | Area [mAU*s] | Height [mAU] | Area %  |
|---------|---------------|-------------|--------------|--------------|---------|
| 1       | 5.587         | 0.1368      | 1878.45886   | 197.77565    | 32.4563 |
| 2       | 6.005         | 0.1321      | 3909.20239   | 455.41733    | 67.5437 |

### HPLC Spectra of *tert*-butyl 3-methyl-2-(naphthalen-1-yl)benzoate (5f)

(The top one is racemic, and the bottom one is chiral)

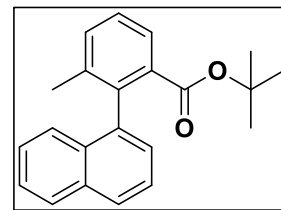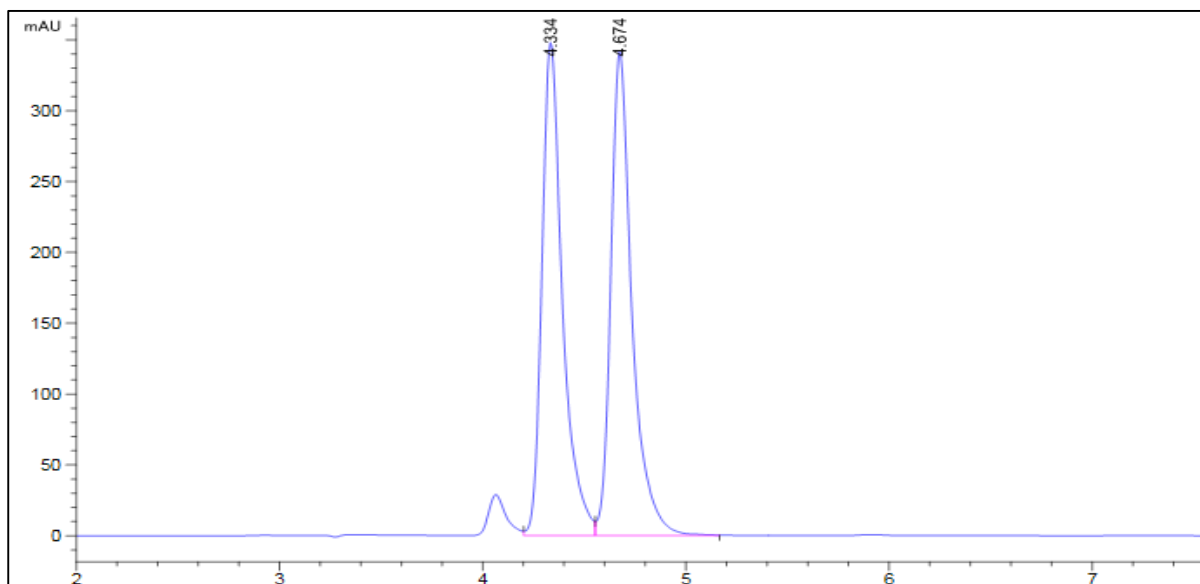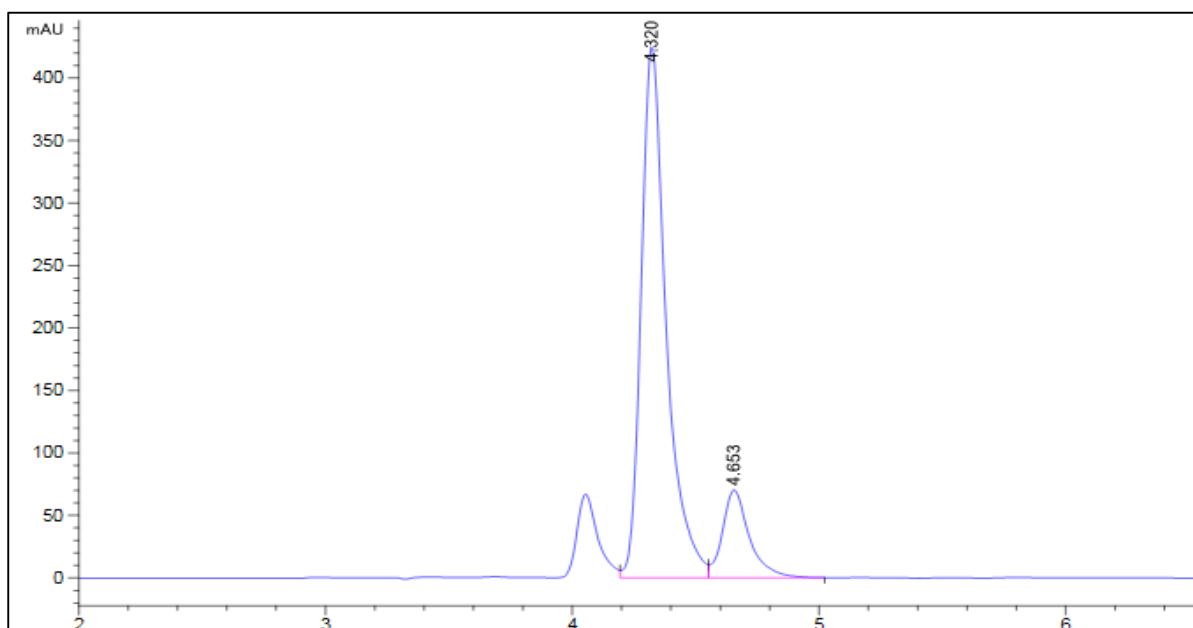

| Entry # | RetTime [min] | Width [min] | Area [mAU*s] | Height [mAU] | Area %  |
|---------|---------------|-------------|--------------|--------------|---------|
| 1       | 4.320         | 0.1044      | 3004.78467   | 425.55936    | 84.9588 |
| 2       | 4.653         | 0.1124      | 531.96991    | 70.23435     | 15.0412 |



### HPLC Spectra of 1-(2-methyl-6-nitrophenyl)naphthalene (5g)

(The top one is racemic, and the bottom one is chiral)

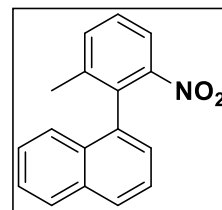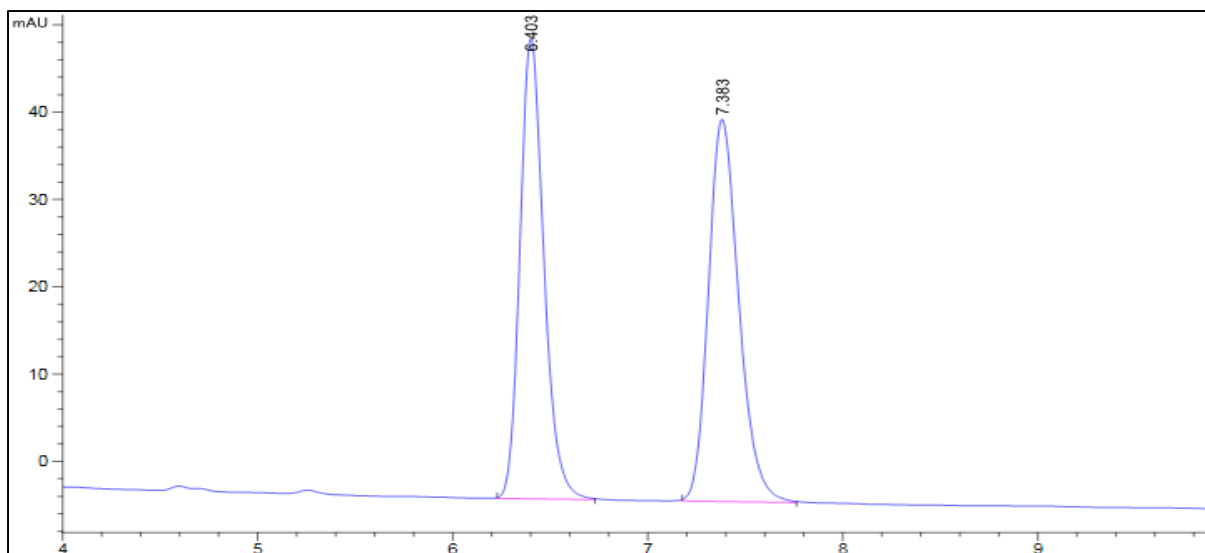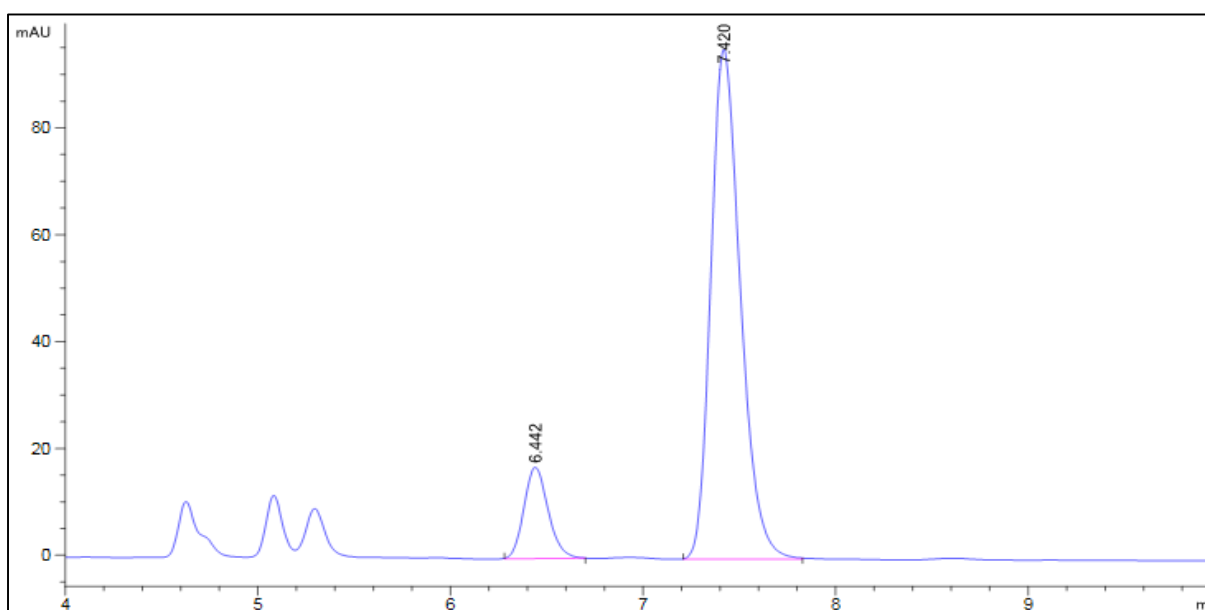

| Entry # | RetTime [min] | Width [min] | Area [mAU*s] | Height [mAU] | Area %  |
|---------|---------------|-------------|--------------|--------------|---------|
| 1       | 6.442         | 0.1358      | 149.11588    | 17.09181     | 12.7700 |
| 2       | 7.420         | 0.1625      | 1018.58496   | 95.43012     | 87.2300 |

**HPLC Spectra of 1-methyl-4-(2-methyl-6-nitrophenyl)naphthalene (5h)**  
 (The top one is racemic, and the bottom one is chiral)

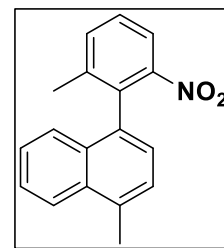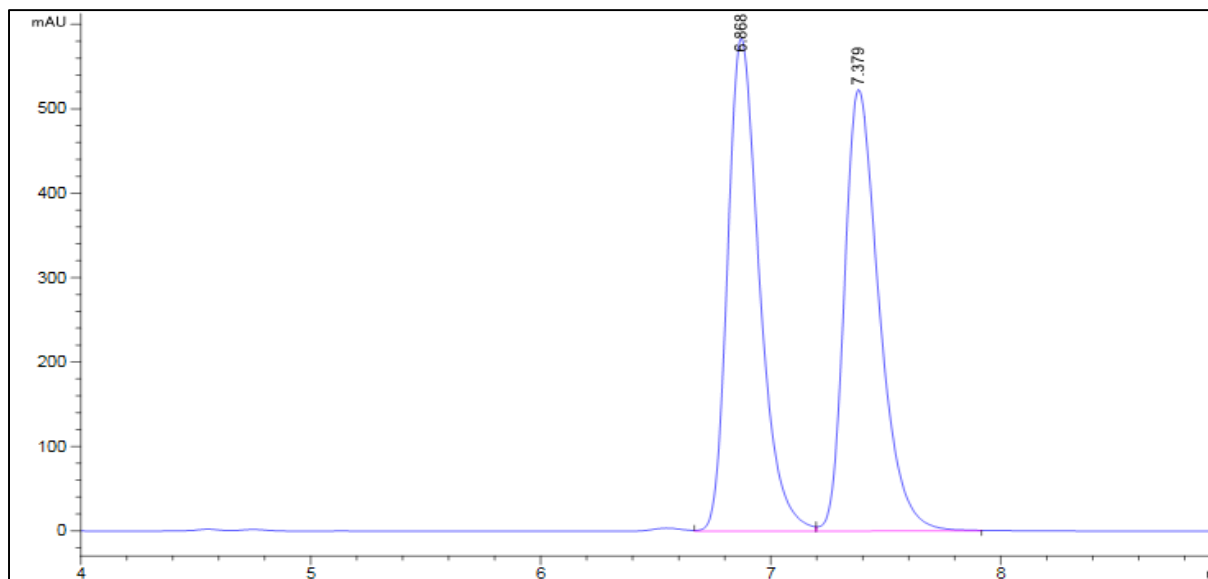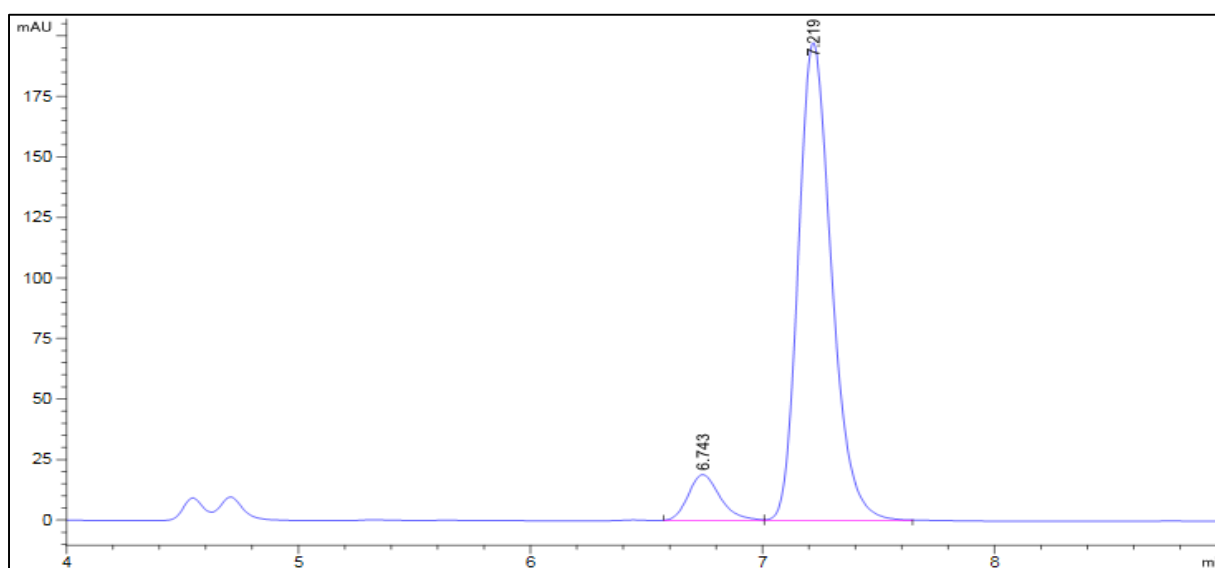

| Entry # | RetTime [min] | Width [min] | Area [mAU*s] | Height [mAU] | Area %  |
|---------|---------------|-------------|--------------|--------------|---------|
| 1       | 6.743         | 0.1454      | 180.80318    | 18.94144     | 8.4327  |
| 2       | 7.219         | 0.1541      | 1963.27869   | 197.36748    | 91.5673 |

### HPLC Spectra of 1-methoxy-4-(2-methyl-6-nitrophenyl)naphthalene (5i)

(The top one is racemic, and the bottom one is chiral)

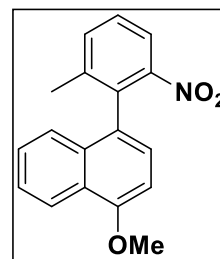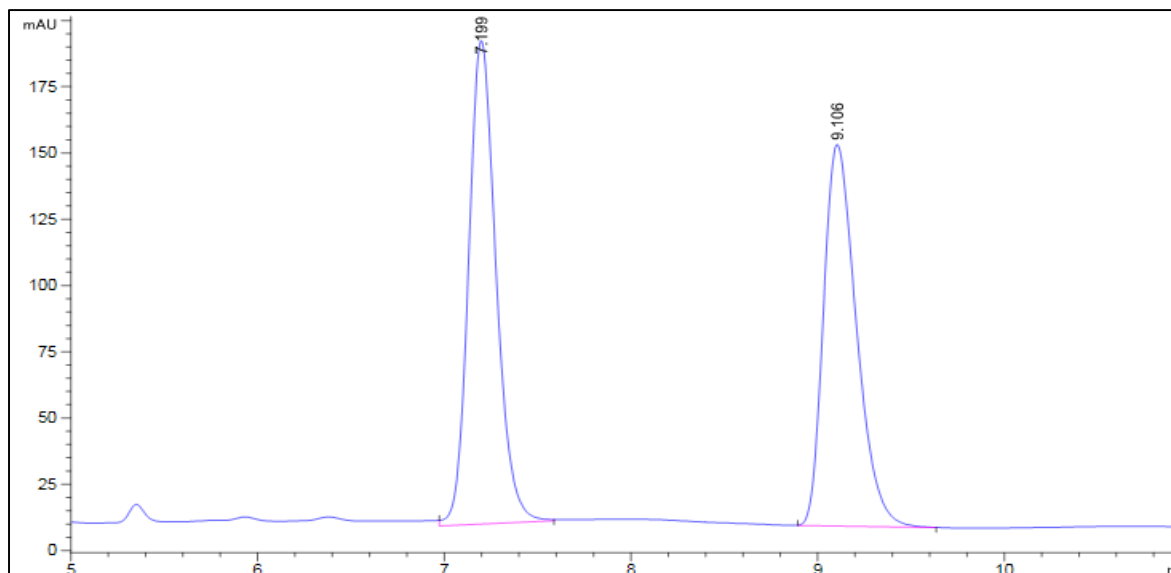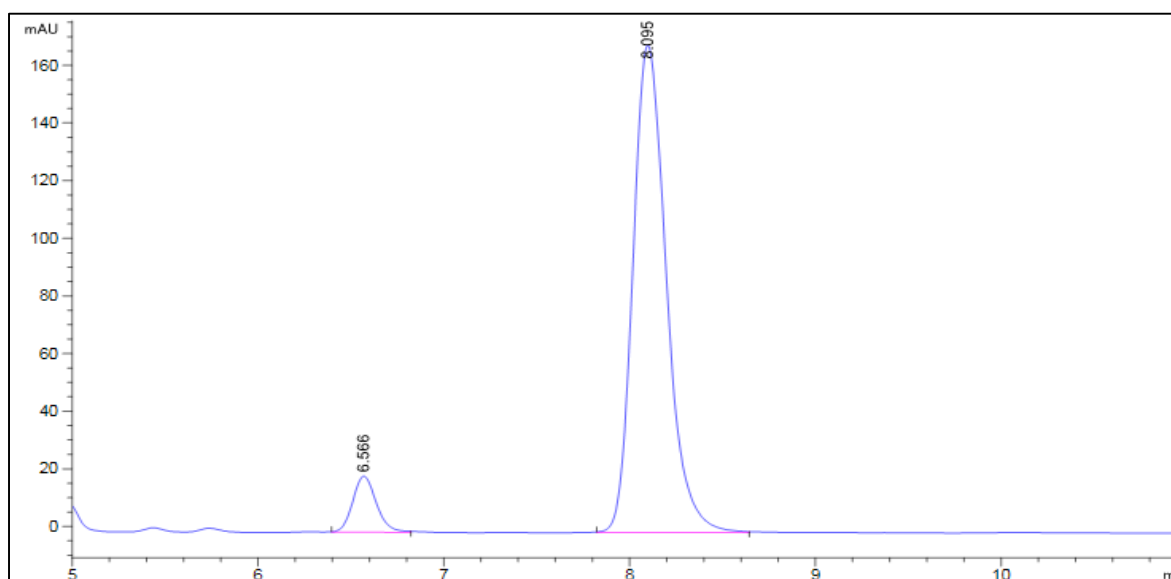

| Entry # | RetTime [min] | Width [min] | Area [mAU*s] | Height [mAU] | Area %  |
|---------|---------------|-------------|--------------|--------------|---------|
| 1       | 6.566         | 0.1351      | 171.92560    | 19.46371     | 7.5375  |
| 2       | 8.095         | 0.1955      | 2109.00220   | 169.15469    | 92.4625 |

**HPLC Spectra of 3-methoxy-2-(naphthalen-1-yl)-*N*-phenylbenzamide (3s)**  
 (The top one is racemic, and the bottom one is chiral)

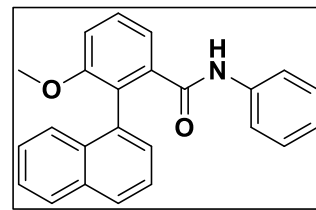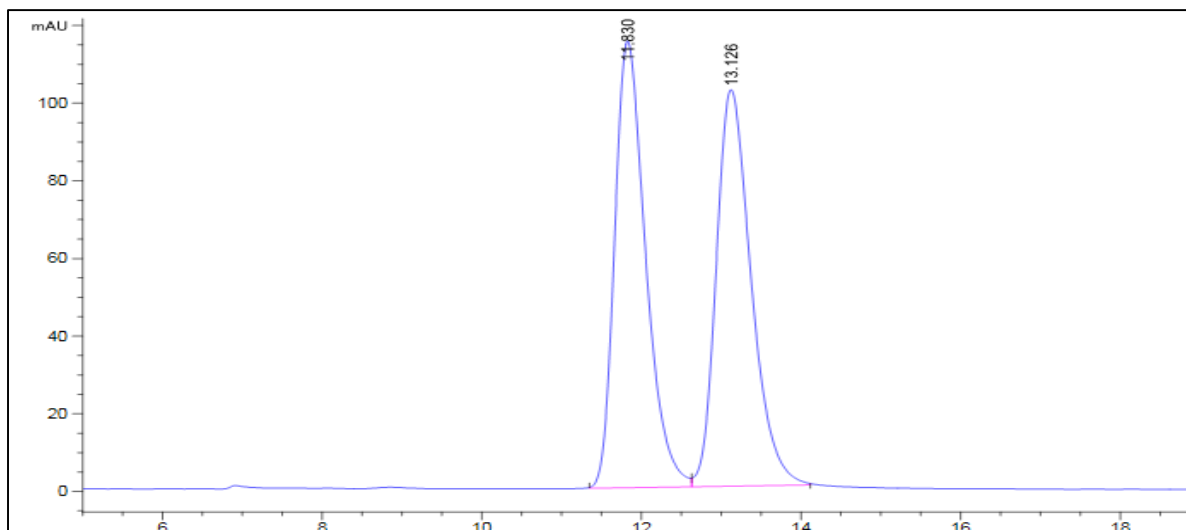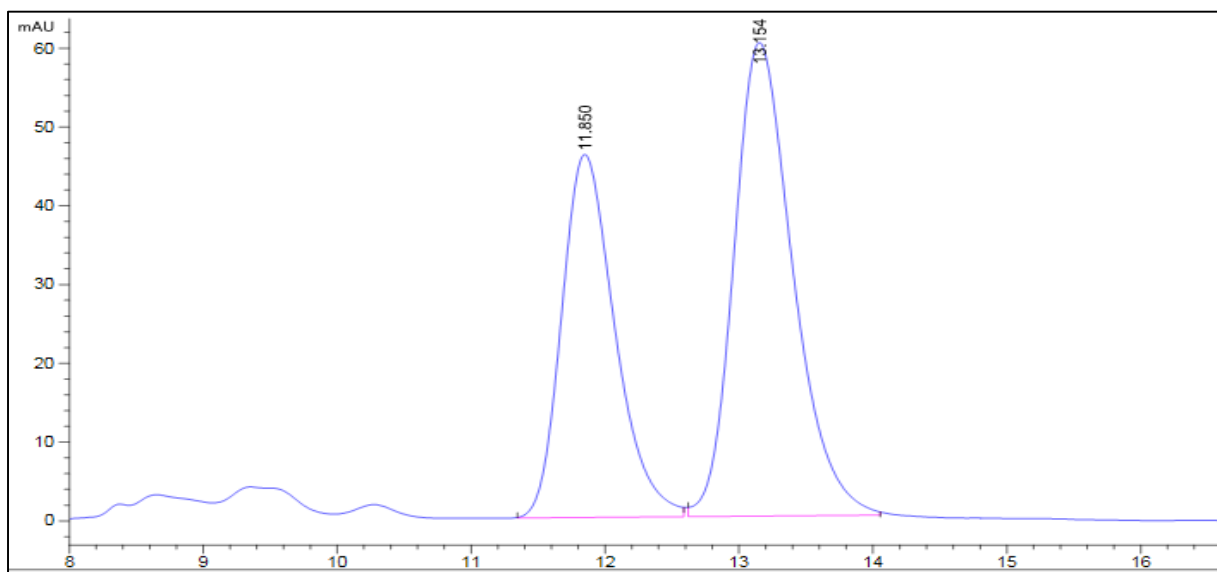

| Entry # | RetTime [min] | Width [min] | Area [mAU*s] | Height [mAU] | Area %  |
|---------|---------------|-------------|--------------|--------------|---------|
| 1       | 11.850        | 0.4242      | 1272.67139   | 46.08847     | 40.9130 |
| 2       | 13.154        | 0.4668      | 1838.00745   | 60.09356     | 59.0870 |

# HPLC Spectra of 3-(benzyloxy)-2-(naphthalen-1-yl)-*N*-phenylbenzamide (3t)

(The top one is racemic, and the bottom one is chiral)

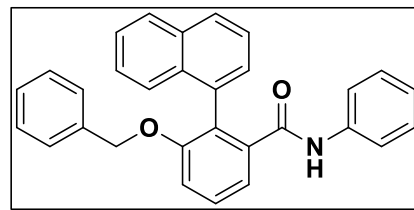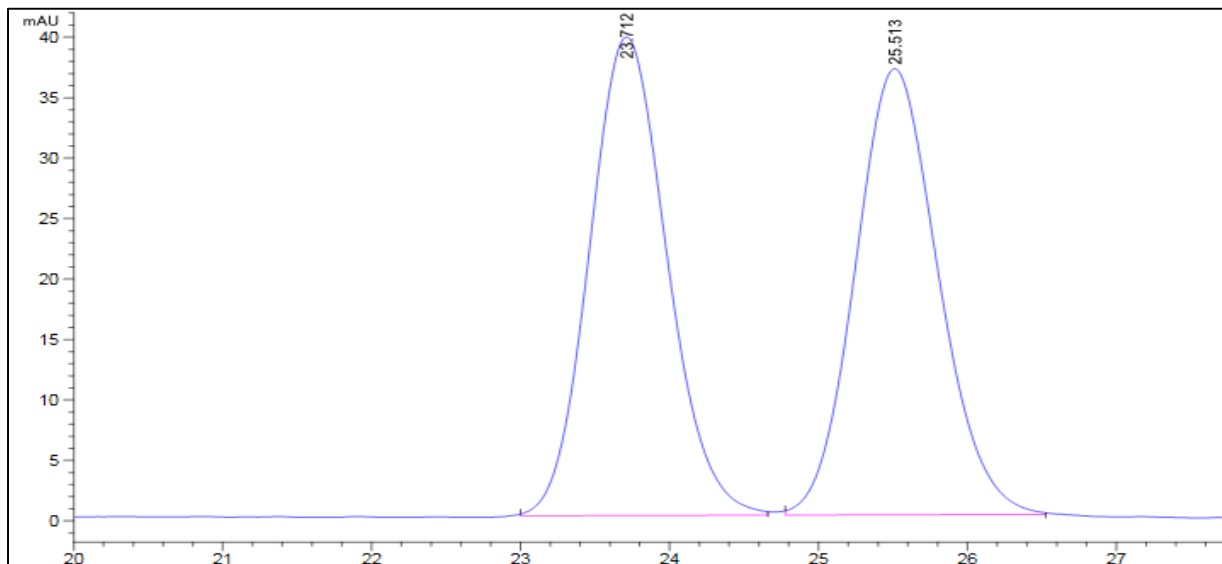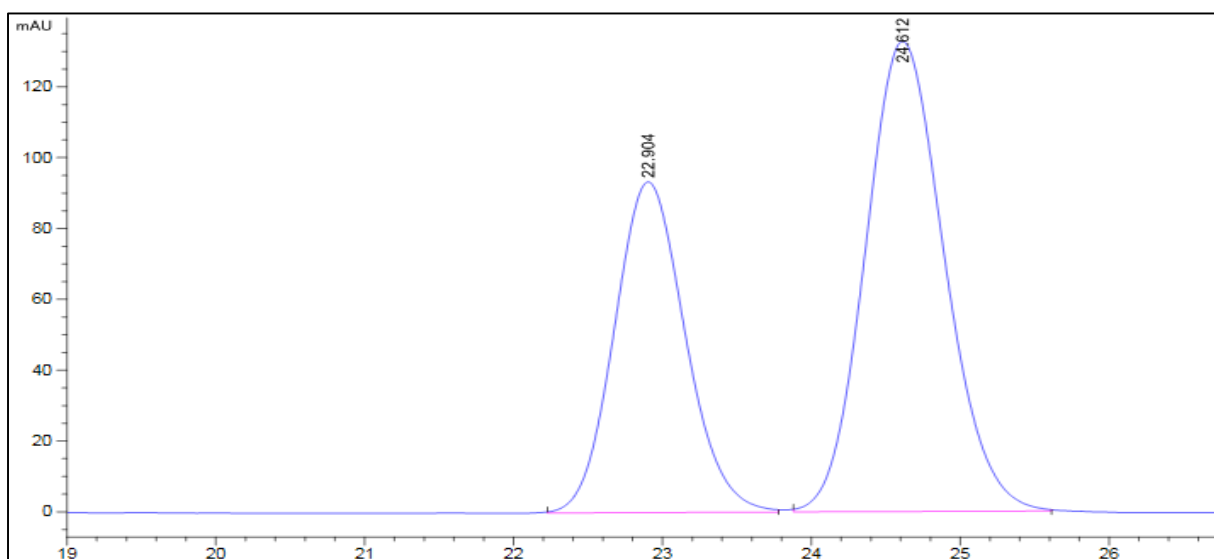

| Entry # | RetTime [min] | Width [min] | Area [mAU*s] | Height [mAU] | Area %  |
|---------|---------------|-------------|--------------|--------------|---------|
| 1       | 22.904        | 0.5138      | 3086.27539   | 93.33580     | 38.6796 |
| 2       | 24.612        | 0.5700      | 4892.80029   | 132.73547    | 61.3204 |

### HPLC Spectra of 2',6-dimethyl-N-phenyl-[1,1'-biphenyl]-2-carboxamide (3u)

(The top one is racemic, and the bottom one is chiral)

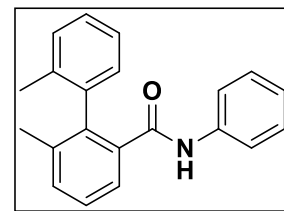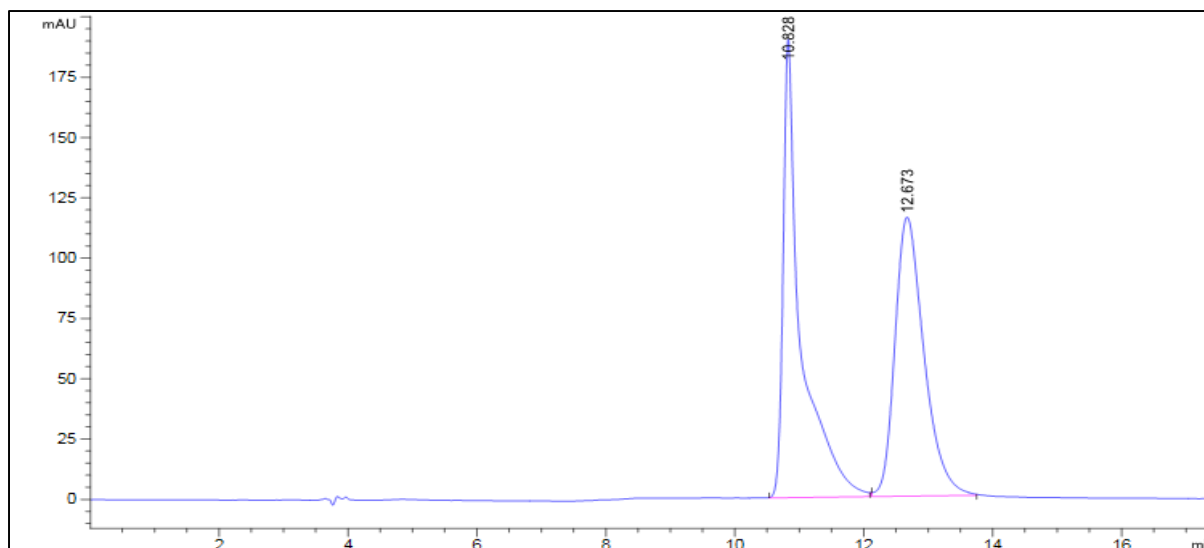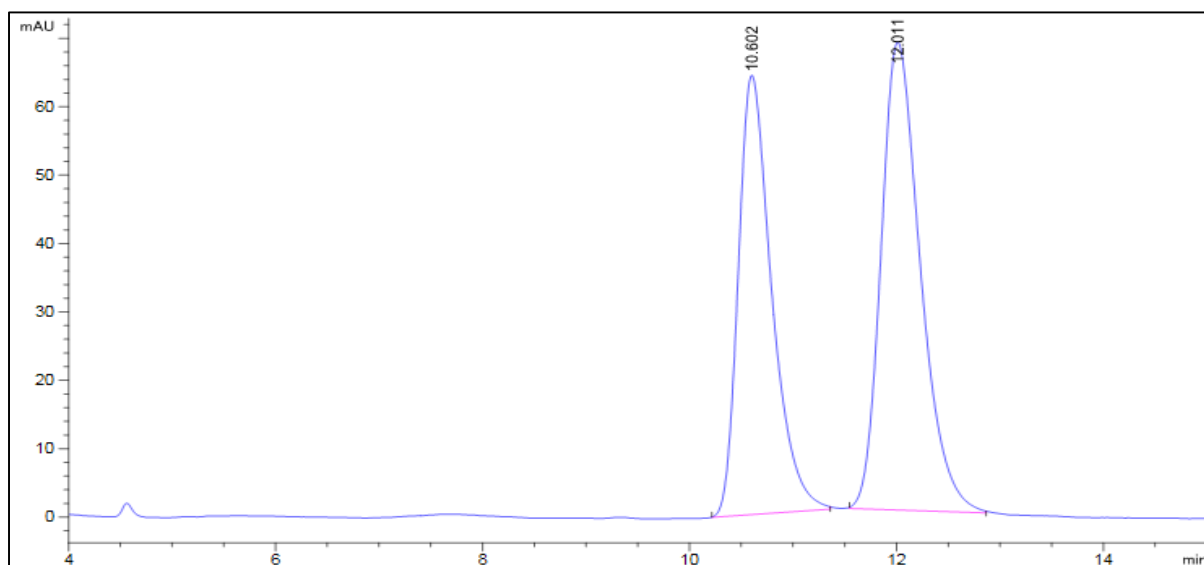

| Entry # | RetTime [min] | Width [min] | Area [mAU*s] | Height [mAU] | Area %  |
|---------|---------------|-------------|--------------|--------------|---------|
| 1       | 10.602        | 0.3395      | 1439.70154   | 64.22195     | 44.3652 |
| 2       | 12.011        | 0.4019      | 1805.41638   | 68.40852     | 55.6348 |

**HPLC Spectra of 2'-methoxy-6-methyl-N-phenyl-[1,1'-biphenyl]-2-carboxamide (3v)**

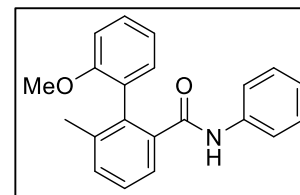

(The top one is racemic, and the bottom one is chiral)

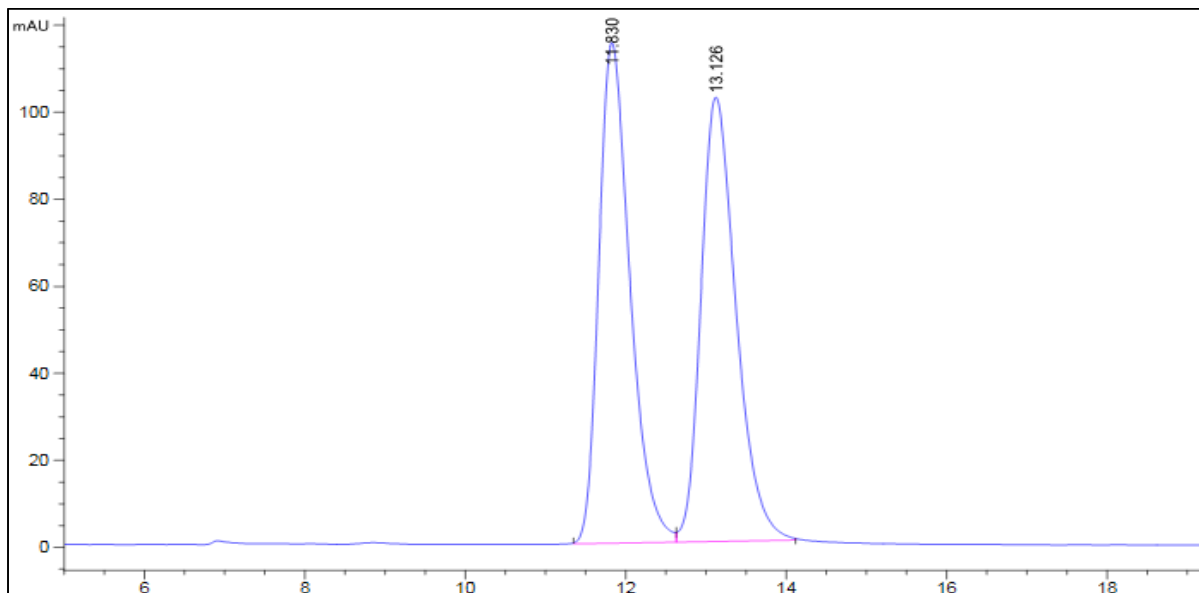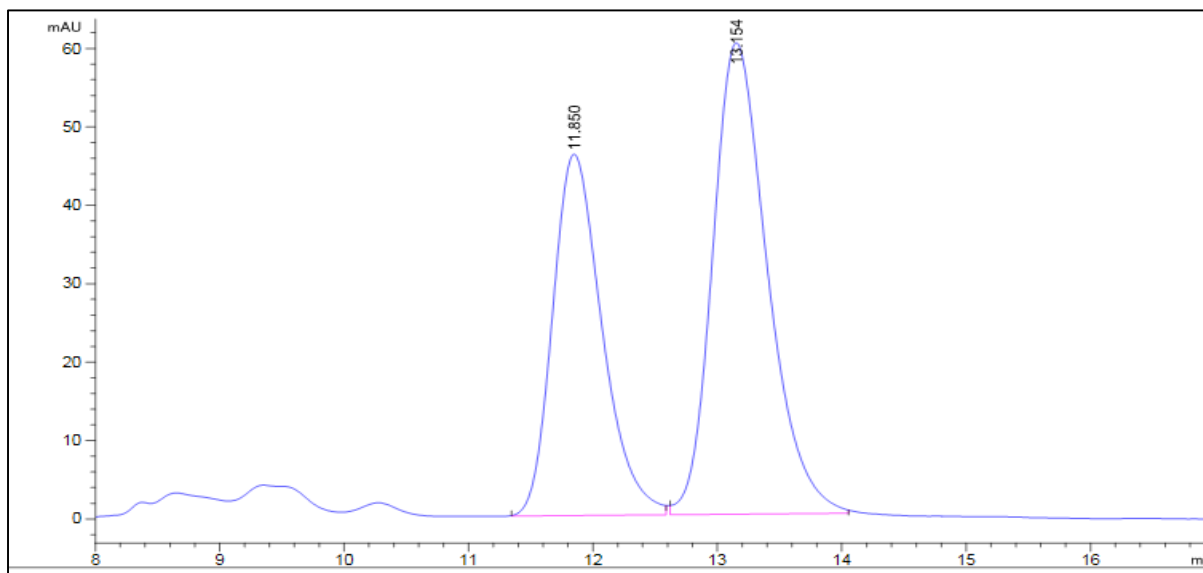

| Entry # | RetTime [min] | Width [min] | Area [mAU*s] | Height [mAU] | Area %  |
|---------|---------------|-------------|--------------|--------------|---------|
| 1       | 11.850        | 0.4242      | 1272.67139   | 46.08847     | 40.9130 |
| 2       | 13.154        | 0.4668      | 1838.00745   | 60.09356     | 59.0870 |
